# Supplementary material for: Stakeholder views of ethical guidance regarding prevention and care in HIV vaccine trials
Source: PubMed Central journal article supplement (PMC4104735; doi:10.1186/1472-6939-15-51), 2014-06-30
Supplement: 1472-6939-15-51-S1.pdf [file 1472-6939-15-51-S1.pdf]

## Questionnaire on UNAIDS guidelines

Hello. The following questionnaire will ask you about ethical standards extracted from UNAIDS-WHO (2007) *Ethical considerations in biomedical HIV prevention trials* and UNAIDS-AVAC (2007) *Good participatory practice guidelines for biomedical HIV prevention trials*. The first 10 standards are about prevention and the rest are about care.

Before you begin, please indicate the stakeholder group to which you belong by marking with an X

|                        |                          |
|------------------------|--------------------------|
| Site staff member      | <input type="checkbox"/> |
| CAB member             | <input type="checkbox"/> |
| REC member             | <input type="checkbox"/> |
| Regulatory member      | <input type="checkbox"/> |
| Sponsor                | <input type="checkbox"/> |
| Other (please specify) | <input type="checkbox"/> |

You may worry that we are testing how much you know about ethical standards. This is not the case. Rather, we hope to identify those areas where ethical standards may have to be clarified, disseminated better, or even changed.

For each ethical standard you will be asked to rate five things:

- How familiar you are with the ethical standard
- How easy you think it is to understand the ethical standard
- How easy you think it is or will be to implement the ethical standard
- How much the ethical standard protects participants
- How strongly you agree with the ethical standard

The relevant ethical standards are written in the left-hand column.

Next to each ethical standard are five rating boxes. Please carefully read the ethical standard and then choose a number between 1 and 5 for each of the five ratings before moving on to the next ethical standard.

### For example:

|                                                    |                                     |   |                                                     |                                     |   |                                                  |                                     |   |                                                 |                                     |   |                                                             |                                     |   |                                                |
|----------------------------------------------------|-------------------------------------|---|-----------------------------------------------------|-------------------------------------|---|--------------------------------------------------|-------------------------------------|---|-------------------------------------------------|-------------------------------------|---|-------------------------------------------------------------|-------------------------------------|---|------------------------------------------------|
| Trial participants should be treated with respect. | <input checked="" type="checkbox"/> | 5 | I am very familiar with this ethical standard       | <input type="checkbox"/>            | 5 | This ethical standard is very easy to understand | <input type="checkbox"/>            | 5 | This ethical standard is very easy to implement | <input type="checkbox"/>            | 5 | This ethical standard greatly protects trial participants   | <input type="checkbox"/>            | 5 | I strongly agree with this ethical standard    |
|                                                    | <input type="checkbox"/>            | 4 |                                                     | <input type="checkbox"/>            | 4 |                                                  | <input type="checkbox"/>            | 4 |                                                 | <input checked="" type="checkbox"/> | 4 |                                                             | <input checked="" type="checkbox"/> | 4 |                                                |
|                                                    | <input type="checkbox"/>            | 3 |                                                     | <input type="checkbox"/>            | 3 |                                                  | <input checked="" type="checkbox"/> | 3 |                                                 | <input type="checkbox"/>            | 3 |                                                             | <input type="checkbox"/>            | 3 |                                                |
|                                                    | <input type="checkbox"/>            | 2 | I am not at all familiar with this ethical standard | <input type="checkbox"/>            | 2 | This ethical standard is very hard to understand | <input type="checkbox"/>            | 2 | This ethical standard is very hard to implement | <input type="checkbox"/>            | 2 | This ethical standard minimally protects trial participants | <input type="checkbox"/>            | 2 | I strongly disagree with this ethical standard |
|                                                    | <input type="checkbox"/>            | 1 |                                                     | <input checked="" type="checkbox"/> | 1 |                                                  | <input type="checkbox"/>            | 1 |                                                 | <input type="checkbox"/>            | 1 |                                                             | <input type="checkbox"/>            | 1 |                                                |

|                                                                                                                                                                                |                                                                                                                                                                                                                                                                              |   |                                               |   |  |   |  |   |                                                     |   |  |                                                                                                                                                                                                                                                                              |   |                                                  |   |  |   |  |   |                                                  |   |  |                                                                                                                                                                                                                                                                            |   |                                                 |   |  |   |  |   |                                                 |   |  |                                                                                                                                                                                                                                                                                                  |   |                                                           |   |  |   |  |   |                                                             |   |  |                                                                                                                                                                                                                                                                       |   |                                             |   |  |   |  |   |                                                |   |  |
|--------------------------------------------------------------------------------------------------------------------------------------------------------------------------------|------------------------------------------------------------------------------------------------------------------------------------------------------------------------------------------------------------------------------------------------------------------------------|---|-----------------------------------------------|---|--|---|--|---|-----------------------------------------------------|---|--|------------------------------------------------------------------------------------------------------------------------------------------------------------------------------------------------------------------------------------------------------------------------------|---|--------------------------------------------------|---|--|---|--|---|--------------------------------------------------|---|--|----------------------------------------------------------------------------------------------------------------------------------------------------------------------------------------------------------------------------------------------------------------------------|---|-------------------------------------------------|---|--|---|--|---|-------------------------------------------------|---|--|--------------------------------------------------------------------------------------------------------------------------------------------------------------------------------------------------------------------------------------------------------------------------------------------------|---|-----------------------------------------------------------|---|--|---|--|---|-------------------------------------------------------------|---|--|-----------------------------------------------------------------------------------------------------------------------------------------------------------------------------------------------------------------------------------------------------------------------|---|---------------------------------------------|---|--|---|--|---|------------------------------------------------|---|--|
| 1. Trial participants should get access to all state of the art HIV prevention services.                                                                                       | <table border="1"> <tr><td>5</td><td>I am very familiar with this ethical standard</td></tr> <tr><td>4</td><td></td></tr> <tr><td>3</td><td></td></tr> <tr><td>2</td><td>I am not at all familiar with this ethical standard</td></tr> <tr><td>1</td><td></td></tr> </table> | 5 | I am very familiar with this ethical standard | 4 |  | 3 |  | 2 | I am not at all familiar with this ethical standard | 1 |  | <table border="1"> <tr><td>5</td><td>This ethical standard is very easy to understand</td></tr> <tr><td>4</td><td></td></tr> <tr><td>3</td><td></td></tr> <tr><td>2</td><td>This ethical standard is very hard to understand</td></tr> <tr><td>1</td><td></td></tr> </table> | 5 | This ethical standard is very easy to understand | 4 |  | 3 |  | 2 | This ethical standard is very hard to understand | 1 |  | <table border="1"> <tr><td>5</td><td>This ethical standard is very easy to implement</td></tr> <tr><td>4</td><td></td></tr> <tr><td>3</td><td></td></tr> <tr><td>2</td><td>This ethical standard is very hard to implement</td></tr> <tr><td>1</td><td></td></tr> </table> | 5 | This ethical standard is very easy to implement | 4 |  | 3 |  | 2 | This ethical standard is very hard to implement | 1 |  | <table border="1"> <tr><td>5</td><td>This ethical standard greatly protects trial participants</td></tr> <tr><td>4</td><td></td></tr> <tr><td>3</td><td></td></tr> <tr><td>2</td><td>This ethical standard minimally protects trial participants</td></tr> <tr><td>1</td><td></td></tr> </table> | 5 | This ethical standard greatly protects trial participants | 4 |  | 3 |  | 2 | This ethical standard minimally protects trial participants | 1 |  | <table border="1"> <tr><td>5</td><td>I strongly agree with this ethical standard</td></tr> <tr><td>4</td><td></td></tr> <tr><td>3</td><td></td></tr> <tr><td>2</td><td>I strongly disagree with this ethical standard</td></tr> <tr><td>1</td><td></td></tr> </table> | 5 | I strongly agree with this ethical standard | 4 |  | 3 |  | 2 | I strongly disagree with this ethical standard | 1 |  |
| 5                                                                                                                                                                              | I am very familiar with this ethical standard                                                                                                                                                                                                                                |   |                                               |   |  |   |  |   |                                                     |   |  |                                                                                                                                                                                                                                                                              |   |                                                  |   |  |   |  |   |                                                  |   |  |                                                                                                                                                                                                                                                                            |   |                                                 |   |  |   |  |   |                                                 |   |  |                                                                                                                                                                                                                                                                                                  |   |                                                           |   |  |   |  |   |                                                             |   |  |                                                                                                                                                                                                                                                                       |   |                                             |   |  |   |  |   |                                                |   |  |
| 4                                                                                                                                                                              |                                                                                                                                                                                                                                                                              |   |                                               |   |  |   |  |   |                                                     |   |  |                                                                                                                                                                                                                                                                              |   |                                                  |   |  |   |  |   |                                                  |   |  |                                                                                                                                                                                                                                                                            |   |                                                 |   |  |   |  |   |                                                 |   |  |                                                                                                                                                                                                                                                                                                  |   |                                                           |   |  |   |  |   |                                                             |   |  |                                                                                                                                                                                                                                                                       |   |                                             |   |  |   |  |   |                                                |   |  |
| 3                                                                                                                                                                              |                                                                                                                                                                                                                                                                              |   |                                               |   |  |   |  |   |                                                     |   |  |                                                                                                                                                                                                                                                                              |   |                                                  |   |  |   |  |   |                                                  |   |  |                                                                                                                                                                                                                                                                            |   |                                                 |   |  |   |  |   |                                                 |   |  |                                                                                                                                                                                                                                                                                                  |   |                                                           |   |  |   |  |   |                                                             |   |  |                                                                                                                                                                                                                                                                       |   |                                             |   |  |   |  |   |                                                |   |  |
| 2                                                                                                                                                                              | I am not at all familiar with this ethical standard                                                                                                                                                                                                                          |   |                                               |   |  |   |  |   |                                                     |   |  |                                                                                                                                                                                                                                                                              |   |                                                  |   |  |   |  |   |                                                  |   |  |                                                                                                                                                                                                                                                                            |   |                                                 |   |  |   |  |   |                                                 |   |  |                                                                                                                                                                                                                                                                                                  |   |                                                           |   |  |   |  |   |                                                             |   |  |                                                                                                                                                                                                                                                                       |   |                                             |   |  |   |  |   |                                                |   |  |
| 1                                                                                                                                                                              |                                                                                                                                                                                                                                                                              |   |                                               |   |  |   |  |   |                                                     |   |  |                                                                                                                                                                                                                                                                              |   |                                                  |   |  |   |  |   |                                                  |   |  |                                                                                                                                                                                                                                                                            |   |                                                 |   |  |   |  |   |                                                 |   |  |                                                                                                                                                                                                                                                                                                  |   |                                                           |   |  |   |  |   |                                                             |   |  |                                                                                                                                                                                                                                                                       |   |                                             |   |  |   |  |   |                                                |   |  |
| 5                                                                                                                                                                              | This ethical standard is very easy to understand                                                                                                                                                                                                                             |   |                                               |   |  |   |  |   |                                                     |   |  |                                                                                                                                                                                                                                                                              |   |                                                  |   |  |   |  |   |                                                  |   |  |                                                                                                                                                                                                                                                                            |   |                                                 |   |  |   |  |   |                                                 |   |  |                                                                                                                                                                                                                                                                                                  |   |                                                           |   |  |   |  |   |                                                             |   |  |                                                                                                                                                                                                                                                                       |   |                                             |   |  |   |  |   |                                                |   |  |
| 4                                                                                                                                                                              |                                                                                                                                                                                                                                                                              |   |                                               |   |  |   |  |   |                                                     |   |  |                                                                                                                                                                                                                                                                              |   |                                                  |   |  |   |  |   |                                                  |   |  |                                                                                                                                                                                                                                                                            |   |                                                 |   |  |   |  |   |                                                 |   |  |                                                                                                                                                                                                                                                                                                  |   |                                                           |   |  |   |  |   |                                                             |   |  |                                                                                                                                                                                                                                                                       |   |                                             |   |  |   |  |   |                                                |   |  |
| 3                                                                                                                                                                              |                                                                                                                                                                                                                                                                              |   |                                               |   |  |   |  |   |                                                     |   |  |                                                                                                                                                                                                                                                                              |   |                                                  |   |  |   |  |   |                                                  |   |  |                                                                                                                                                                                                                                                                            |   |                                                 |   |  |   |  |   |                                                 |   |  |                                                                                                                                                                                                                                                                                                  |   |                                                           |   |  |   |  |   |                                                             |   |  |                                                                                                                                                                                                                                                                       |   |                                             |   |  |   |  |   |                                                |   |  |
| 2                                                                                                                                                                              | This ethical standard is very hard to understand                                                                                                                                                                                                                             |   |                                               |   |  |   |  |   |                                                     |   |  |                                                                                                                                                                                                                                                                              |   |                                                  |   |  |   |  |   |                                                  |   |  |                                                                                                                                                                                                                                                                            |   |                                                 |   |  |   |  |   |                                                 |   |  |                                                                                                                                                                                                                                                                                                  |   |                                                           |   |  |   |  |   |                                                             |   |  |                                                                                                                                                                                                                                                                       |   |                                             |   |  |   |  |   |                                                |   |  |
| 1                                                                                                                                                                              |                                                                                                                                                                                                                                                                              |   |                                               |   |  |   |  |   |                                                     |   |  |                                                                                                                                                                                                                                                                              |   |                                                  |   |  |   |  |   |                                                  |   |  |                                                                                                                                                                                                                                                                            |   |                                                 |   |  |   |  |   |                                                 |   |  |                                                                                                                                                                                                                                                                                                  |   |                                                           |   |  |   |  |   |                                                             |   |  |                                                                                                                                                                                                                                                                       |   |                                             |   |  |   |  |   |                                                |   |  |
| 5                                                                                                                                                                              | This ethical standard is very easy to implement                                                                                                                                                                                                                              |   |                                               |   |  |   |  |   |                                                     |   |  |                                                                                                                                                                                                                                                                              |   |                                                  |   |  |   |  |   |                                                  |   |  |                                                                                                                                                                                                                                                                            |   |                                                 |   |  |   |  |   |                                                 |   |  |                                                                                                                                                                                                                                                                                                  |   |                                                           |   |  |   |  |   |                                                             |   |  |                                                                                                                                                                                                                                                                       |   |                                             |   |  |   |  |   |                                                |   |  |
| 4                                                                                                                                                                              |                                                                                                                                                                                                                                                                              |   |                                               |   |  |   |  |   |                                                     |   |  |                                                                                                                                                                                                                                                                              |   |                                                  |   |  |   |  |   |                                                  |   |  |                                                                                                                                                                                                                                                                            |   |                                                 |   |  |   |  |   |                                                 |   |  |                                                                                                                                                                                                                                                                                                  |   |                                                           |   |  |   |  |   |                                                             |   |  |                                                                                                                                                                                                                                                                       |   |                                             |   |  |   |  |   |                                                |   |  |
| 3                                                                                                                                                                              |                                                                                                                                                                                                                                                                              |   |                                               |   |  |   |  |   |                                                     |   |  |                                                                                                                                                                                                                                                                              |   |                                                  |   |  |   |  |   |                                                  |   |  |                                                                                                                                                                                                                                                                            |   |                                                 |   |  |   |  |   |                                                 |   |  |                                                                                                                                                                                                                                                                                                  |   |                                                           |   |  |   |  |   |                                                             |   |  |                                                                                                                                                                                                                                                                       |   |                                             |   |  |   |  |   |                                                |   |  |
| 2                                                                                                                                                                              | This ethical standard is very hard to implement                                                                                                                                                                                                                              |   |                                               |   |  |   |  |   |                                                     |   |  |                                                                                                                                                                                                                                                                              |   |                                                  |   |  |   |  |   |                                                  |   |  |                                                                                                                                                                                                                                                                            |   |                                                 |   |  |   |  |   |                                                 |   |  |                                                                                                                                                                                                                                                                                                  |   |                                                           |   |  |   |  |   |                                                             |   |  |                                                                                                                                                                                                                                                                       |   |                                             |   |  |   |  |   |                                                |   |  |
| 1                                                                                                                                                                              |                                                                                                                                                                                                                                                                              |   |                                               |   |  |   |  |   |                                                     |   |  |                                                                                                                                                                                                                                                                              |   |                                                  |   |  |   |  |   |                                                  |   |  |                                                                                                                                                                                                                                                                            |   |                                                 |   |  |   |  |   |                                                 |   |  |                                                                                                                                                                                                                                                                                                  |   |                                                           |   |  |   |  |   |                                                             |   |  |                                                                                                                                                                                                                                                                       |   |                                             |   |  |   |  |   |                                                |   |  |
| 5                                                                                                                                                                              | This ethical standard greatly protects trial participants                                                                                                                                                                                                                    |   |                                               |   |  |   |  |   |                                                     |   |  |                                                                                                                                                                                                                                                                              |   |                                                  |   |  |   |  |   |                                                  |   |  |                                                                                                                                                                                                                                                                            |   |                                                 |   |  |   |  |   |                                                 |   |  |                                                                                                                                                                                                                                                                                                  |   |                                                           |   |  |   |  |   |                                                             |   |  |                                                                                                                                                                                                                                                                       |   |                                             |   |  |   |  |   |                                                |   |  |
| 4                                                                                                                                                                              |                                                                                                                                                                                                                                                                              |   |                                               |   |  |   |  |   |                                                     |   |  |                                                                                                                                                                                                                                                                              |   |                                                  |   |  |   |  |   |                                                  |   |  |                                                                                                                                                                                                                                                                            |   |                                                 |   |  |   |  |   |                                                 |   |  |                                                                                                                                                                                                                                                                                                  |   |                                                           |   |  |   |  |   |                                                             |   |  |                                                                                                                                                                                                                                                                       |   |                                             |   |  |   |  |   |                                                |   |  |
| 3                                                                                                                                                                              |                                                                                                                                                                                                                                                                              |   |                                               |   |  |   |  |   |                                                     |   |  |                                                                                                                                                                                                                                                                              |   |                                                  |   |  |   |  |   |                                                  |   |  |                                                                                                                                                                                                                                                                            |   |                                                 |   |  |   |  |   |                                                 |   |  |                                                                                                                                                                                                                                                                                                  |   |                                                           |   |  |   |  |   |                                                             |   |  |                                                                                                                                                                                                                                                                       |   |                                             |   |  |   |  |   |                                                |   |  |
| 2                                                                                                                                                                              | This ethical standard minimally protects trial participants                                                                                                                                                                                                                  |   |                                               |   |  |   |  |   |                                                     |   |  |                                                                                                                                                                                                                                                                              |   |                                                  |   |  |   |  |   |                                                  |   |  |                                                                                                                                                                                                                                                                            |   |                                                 |   |  |   |  |   |                                                 |   |  |                                                                                                                                                                                                                                                                                                  |   |                                                           |   |  |   |  |   |                                                             |   |  |                                                                                                                                                                                                                                                                       |   |                                             |   |  |   |  |   |                                                |   |  |
| 1                                                                                                                                                                              |                                                                                                                                                                                                                                                                              |   |                                               |   |  |   |  |   |                                                     |   |  |                                                                                                                                                                                                                                                                              |   |                                                  |   |  |   |  |   |                                                  |   |  |                                                                                                                                                                                                                                                                            |   |                                                 |   |  |   |  |   |                                                 |   |  |                                                                                                                                                                                                                                                                                                  |   |                                                           |   |  |   |  |   |                                                             |   |  |                                                                                                                                                                                                                                                                       |   |                                             |   |  |   |  |   |                                                |   |  |
| 5                                                                                                                                                                              | I strongly agree with this ethical standard                                                                                                                                                                                                                                  |   |                                               |   |  |   |  |   |                                                     |   |  |                                                                                                                                                                                                                                                                              |   |                                                  |   |  |   |  |   |                                                  |   |  |                                                                                                                                                                                                                                                                            |   |                                                 |   |  |   |  |   |                                                 |   |  |                                                                                                                                                                                                                                                                                                  |   |                                                           |   |  |   |  |   |                                                             |   |  |                                                                                                                                                                                                                                                                       |   |                                             |   |  |   |  |   |                                                |   |  |
| 4                                                                                                                                                                              |                                                                                                                                                                                                                                                                              |   |                                               |   |  |   |  |   |                                                     |   |  |                                                                                                                                                                                                                                                                              |   |                                                  |   |  |   |  |   |                                                  |   |  |                                                                                                                                                                                                                                                                            |   |                                                 |   |  |   |  |   |                                                 |   |  |                                                                                                                                                                                                                                                                                                  |   |                                                           |   |  |   |  |   |                                                             |   |  |                                                                                                                                                                                                                                                                       |   |                                             |   |  |   |  |   |                                                |   |  |
| 3                                                                                                                                                                              |                                                                                                                                                                                                                                                                              |   |                                               |   |  |   |  |   |                                                     |   |  |                                                                                                                                                                                                                                                                              |   |                                                  |   |  |   |  |   |                                                  |   |  |                                                                                                                                                                                                                                                                            |   |                                                 |   |  |   |  |   |                                                 |   |  |                                                                                                                                                                                                                                                                                                  |   |                                                           |   |  |   |  |   |                                                             |   |  |                                                                                                                                                                                                                                                                       |   |                                             |   |  |   |  |   |                                                |   |  |
| 2                                                                                                                                                                              | I strongly disagree with this ethical standard                                                                                                                                                                                                                               |   |                                               |   |  |   |  |   |                                                     |   |  |                                                                                                                                                                                                                                                                              |   |                                                  |   |  |   |  |   |                                                  |   |  |                                                                                                                                                                                                                                                                            |   |                                                 |   |  |   |  |   |                                                 |   |  |                                                                                                                                                                                                                                                                                                  |   |                                                           |   |  |   |  |   |                                                             |   |  |                                                                                                                                                                                                                                                                       |   |                                             |   |  |   |  |   |                                                |   |  |
| 1                                                                                                                                                                              |                                                                                                                                                                                                                                                                              |   |                                               |   |  |   |  |   |                                                     |   |  |                                                                                                                                                                                                                                                                              |   |                                                  |   |  |   |  |   |                                                  |   |  |                                                                                                                                                                                                                                                                            |   |                                                 |   |  |   |  |   |                                                 |   |  |                                                                                                                                                                                                                                                                                                  |   |                                                           |   |  |   |  |   |                                                             |   |  |                                                                                                                                                                                                                                                                       |   |                                             |   |  |   |  |   |                                                |   |  |
| 2. New prevention methods should be added to the prevention package as they are validated or approved by relevant authorities.                                                 | <table border="1"> <tr><td>5</td><td>I am very familiar with this ethical standard</td></tr> <tr><td>4</td><td></td></tr> <tr><td>3</td><td></td></tr> <tr><td>2</td><td>I am not at all familiar with this ethical standard</td></tr> <tr><td>1</td><td></td></tr> </table> | 5 | I am very familiar with this ethical standard | 4 |  | 3 |  | 2 | I am not at all familiar with this ethical standard | 1 |  | <table border="1"> <tr><td>5</td><td>This ethical standard is very easy to understand</td></tr> <tr><td>4</td><td></td></tr> <tr><td>3</td><td></td></tr> <tr><td>2</td><td>This ethical standard is very hard to understand</td></tr> <tr><td>1</td><td></td></tr> </table> | 5 | This ethical standard is very easy to understand | 4 |  | 3 |  | 2 | This ethical standard is very hard to understand | 1 |  | <table border="1"> <tr><td>5</td><td>This ethical standard is very easy to implement</td></tr> <tr><td>4</td><td></td></tr> <tr><td>3</td><td></td></tr> <tr><td>2</td><td>This ethical standard is very hard to implement</td></tr> <tr><td>1</td><td></td></tr> </table> | 5 | This ethical standard is very easy to implement | 4 |  | 3 |  | 2 | This ethical standard is very hard to implement | 1 |  | <table border="1"> <tr><td>5</td><td>This ethical standard greatly protects trial participants</td></tr> <tr><td>4</td><td></td></tr> <tr><td>3</td><td></td></tr> <tr><td>2</td><td>This ethical standard minimally protects trial participants</td></tr> <tr><td>1</td><td></td></tr> </table> | 5 | This ethical standard greatly protects trial participants | 4 |  | 3 |  | 2 | This ethical standard minimally protects trial participants | 1 |  | <table border="1"> <tr><td>5</td><td>I strongly agree with this ethical standard</td></tr> <tr><td>4</td><td></td></tr> <tr><td>3</td><td></td></tr> <tr><td>2</td><td>I strongly disagree with this ethical standard</td></tr> <tr><td>1</td><td></td></tr> </table> | 5 | I strongly agree with this ethical standard | 4 |  | 3 |  | 2 | I strongly disagree with this ethical standard | 1 |  |
| 5                                                                                                                                                                              | I am very familiar with this ethical standard                                                                                                                                                                                                                                |   |                                               |   |  |   |  |   |                                                     |   |  |                                                                                                                                                                                                                                                                              |   |                                                  |   |  |   |  |   |                                                  |   |  |                                                                                                                                                                                                                                                                            |   |                                                 |   |  |   |  |   |                                                 |   |  |                                                                                                                                                                                                                                                                                                  |   |                                                           |   |  |   |  |   |                                                             |   |  |                                                                                                                                                                                                                                                                       |   |                                             |   |  |   |  |   |                                                |   |  |
| 4                                                                                                                                                                              |                                                                                                                                                                                                                                                                              |   |                                               |   |  |   |  |   |                                                     |   |  |                                                                                                                                                                                                                                                                              |   |                                                  |   |  |   |  |   |                                                  |   |  |                                                                                                                                                                                                                                                                            |   |                                                 |   |  |   |  |   |                                                 |   |  |                                                                                                                                                                                                                                                                                                  |   |                                                           |   |  |   |  |   |                                                             |   |  |                                                                                                                                                                                                                                                                       |   |                                             |   |  |   |  |   |                                                |   |  |
| 3                                                                                                                                                                              |                                                                                                                                                                                                                                                                              |   |                                               |   |  |   |  |   |                                                     |   |  |                                                                                                                                                                                                                                                                              |   |                                                  |   |  |   |  |   |                                                  |   |  |                                                                                                                                                                                                                                                                            |   |                                                 |   |  |   |  |   |                                                 |   |  |                                                                                                                                                                                                                                                                                                  |   |                                                           |   |  |   |  |   |                                                             |   |  |                                                                                                                                                                                                                                                                       |   |                                             |   |  |   |  |   |                                                |   |  |
| 2                                                                                                                                                                              | I am not at all familiar with this ethical standard                                                                                                                                                                                                                          |   |                                               |   |  |   |  |   |                                                     |   |  |                                                                                                                                                                                                                                                                              |   |                                                  |   |  |   |  |   |                                                  |   |  |                                                                                                                                                                                                                                                                            |   |                                                 |   |  |   |  |   |                                                 |   |  |                                                                                                                                                                                                                                                                                                  |   |                                                           |   |  |   |  |   |                                                             |   |  |                                                                                                                                                                                                                                                                       |   |                                             |   |  |   |  |   |                                                |   |  |
| 1                                                                                                                                                                              |                                                                                                                                                                                                                                                                              |   |                                               |   |  |   |  |   |                                                     |   |  |                                                                                                                                                                                                                                                                              |   |                                                  |   |  |   |  |   |                                                  |   |  |                                                                                                                                                                                                                                                                            |   |                                                 |   |  |   |  |   |                                                 |   |  |                                                                                                                                                                                                                                                                                                  |   |                                                           |   |  |   |  |   |                                                             |   |  |                                                                                                                                                                                                                                                                       |   |                                             |   |  |   |  |   |                                                |   |  |
| 5                                                                                                                                                                              | This ethical standard is very easy to understand                                                                                                                                                                                                                             |   |                                               |   |  |   |  |   |                                                     |   |  |                                                                                                                                                                                                                                                                              |   |                                                  |   |  |   |  |   |                                                  |   |  |                                                                                                                                                                                                                                                                            |   |                                                 |   |  |   |  |   |                                                 |   |  |                                                                                                                                                                                                                                                                                                  |   |                                                           |   |  |   |  |   |                                                             |   |  |                                                                                                                                                                                                                                                                       |   |                                             |   |  |   |  |   |                                                |   |  |
| 4                                                                                                                                                                              |                                                                                                                                                                                                                                                                              |   |                                               |   |  |   |  |   |                                                     |   |  |                                                                                                                                                                                                                                                                              |   |                                                  |   |  |   |  |   |                                                  |   |  |                                                                                                                                                                                                                                                                            |   |                                                 |   |  |   |  |   |                                                 |   |  |                                                                                                                                                                                                                                                                                                  |   |                                                           |   |  |   |  |   |                                                             |   |  |                                                                                                                                                                                                                                                                       |   |                                             |   |  |   |  |   |                                                |   |  |
| 3                                                                                                                                                                              |                                                                                                                                                                                                                                                                              |   |                                               |   |  |   |  |   |                                                     |   |  |                                                                                                                                                                                                                                                                              |   |                                                  |   |  |   |  |   |                                                  |   |  |                                                                                                                                                                                                                                                                            |   |                                                 |   |  |   |  |   |                                                 |   |  |                                                                                                                                                                                                                                                                                                  |   |                                                           |   |  |   |  |   |                                                             |   |  |                                                                                                                                                                                                                                                                       |   |                                             |   |  |   |  |   |                                                |   |  |
| 2                                                                                                                                                                              | This ethical standard is very hard to understand                                                                                                                                                                                                                             |   |                                               |   |  |   |  |   |                                                     |   |  |                                                                                                                                                                                                                                                                              |   |                                                  |   |  |   |  |   |                                                  |   |  |                                                                                                                                                                                                                                                                            |   |                                                 |   |  |   |  |   |                                                 |   |  |                                                                                                                                                                                                                                                                                                  |   |                                                           |   |  |   |  |   |                                                             |   |  |                                                                                                                                                                                                                                                                       |   |                                             |   |  |   |  |   |                                                |   |  |
| 1                                                                                                                                                                              |                                                                                                                                                                                                                                                                              |   |                                               |   |  |   |  |   |                                                     |   |  |                                                                                                                                                                                                                                                                              |   |                                                  |   |  |   |  |   |                                                  |   |  |                                                                                                                                                                                                                                                                            |   |                                                 |   |  |   |  |   |                                                 |   |  |                                                                                                                                                                                                                                                                                                  |   |                                                           |   |  |   |  |   |                                                             |   |  |                                                                                                                                                                                                                                                                       |   |                                             |   |  |   |  |   |                                                |   |  |
| 5                                                                                                                                                                              | This ethical standard is very easy to implement                                                                                                                                                                                                                              |   |                                               |   |  |   |  |   |                                                     |   |  |                                                                                                                                                                                                                                                                              |   |                                                  |   |  |   |  |   |                                                  |   |  |                                                                                                                                                                                                                                                                            |   |                                                 |   |  |   |  |   |                                                 |   |  |                                                                                                                                                                                                                                                                                                  |   |                                                           |   |  |   |  |   |                                                             |   |  |                                                                                                                                                                                                                                                                       |   |                                             |   |  |   |  |   |                                                |   |  |
| 4                                                                                                                                                                              |                                                                                                                                                                                                                                                                              |   |                                               |   |  |   |  |   |                                                     |   |  |                                                                                                                                                                                                                                                                              |   |                                                  |   |  |   |  |   |                                                  |   |  |                                                                                                                                                                                                                                                                            |   |                                                 |   |  |   |  |   |                                                 |   |  |                                                                                                                                                                                                                                                                                                  |   |                                                           |   |  |   |  |   |                                                             |   |  |                                                                                                                                                                                                                                                                       |   |                                             |   |  |   |  |   |                                                |   |  |
| 3                                                                                                                                                                              |                                                                                                                                                                                                                                                                              |   |                                               |   |  |   |  |   |                                                     |   |  |                                                                                                                                                                                                                                                                              |   |                                                  |   |  |   |  |   |                                                  |   |  |                                                                                                                                                                                                                                                                            |   |                                                 |   |  |   |  |   |                                                 |   |  |                                                                                                                                                                                                                                                                                                  |   |                                                           |   |  |   |  |   |                                                             |   |  |                                                                                                                                                                                                                                                                       |   |                                             |   |  |   |  |   |                                                |   |  |
| 2                                                                                                                                                                              | This ethical standard is very hard to implement                                                                                                                                                                                                                              |   |                                               |   |  |   |  |   |                                                     |   |  |                                                                                                                                                                                                                                                                              |   |                                                  |   |  |   |  |   |                                                  |   |  |                                                                                                                                                                                                                                                                            |   |                                                 |   |  |   |  |   |                                                 |   |  |                                                                                                                                                                                                                                                                                                  |   |                                                           |   |  |   |  |   |                                                             |   |  |                                                                                                                                                                                                                                                                       |   |                                             |   |  |   |  |   |                                                |   |  |
| 1                                                                                                                                                                              |                                                                                                                                                                                                                                                                              |   |                                               |   |  |   |  |   |                                                     |   |  |                                                                                                                                                                                                                                                                              |   |                                                  |   |  |   |  |   |                                                  |   |  |                                                                                                                                                                                                                                                                            |   |                                                 |   |  |   |  |   |                                                 |   |  |                                                                                                                                                                                                                                                                                                  |   |                                                           |   |  |   |  |   |                                                             |   |  |                                                                                                                                                                                                                                                                       |   |                                             |   |  |   |  |   |                                                |   |  |
| 5                                                                                                                                                                              | This ethical standard greatly protects trial participants                                                                                                                                                                                                                    |   |                                               |   |  |   |  |   |                                                     |   |  |                                                                                                                                                                                                                                                                              |   |                                                  |   |  |   |  |   |                                                  |   |  |                                                                                                                                                                                                                                                                            |   |                                                 |   |  |   |  |   |                                                 |   |  |                                                                                                                                                                                                                                                                                                  |   |                                                           |   |  |   |  |   |                                                             |   |  |                                                                                                                                                                                                                                                                       |   |                                             |   |  |   |  |   |                                                |   |  |
| 4                                                                                                                                                                              |                                                                                                                                                                                                                                                                              |   |                                               |   |  |   |  |   |                                                     |   |  |                                                                                                                                                                                                                                                                              |   |                                                  |   |  |   |  |   |                                                  |   |  |                                                                                                                                                                                                                                                                            |   |                                                 |   |  |   |  |   |                                                 |   |  |                                                                                                                                                                                                                                                                                                  |   |                                                           |   |  |   |  |   |                                                             |   |  |                                                                                                                                                                                                                                                                       |   |                                             |   |  |   |  |   |                                                |   |  |
| 3                                                                                                                                                                              |                                                                                                                                                                                                                                                                              |   |                                               |   |  |   |  |   |                                                     |   |  |                                                                                                                                                                                                                                                                              |   |                                                  |   |  |   |  |   |                                                  |   |  |                                                                                                                                                                                                                                                                            |   |                                                 |   |  |   |  |   |                                                 |   |  |                                                                                                                                                                                                                                                                                                  |   |                                                           |   |  |   |  |   |                                                             |   |  |                                                                                                                                                                                                                                                                       |   |                                             |   |  |   |  |   |                                                |   |  |
| 2                                                                                                                                                                              | This ethical standard minimally protects trial participants                                                                                                                                                                                                                  |   |                                               |   |  |   |  |   |                                                     |   |  |                                                                                                                                                                                                                                                                              |   |                                                  |   |  |   |  |   |                                                  |   |  |                                                                                                                                                                                                                                                                            |   |                                                 |   |  |   |  |   |                                                 |   |  |                                                                                                                                                                                                                                                                                                  |   |                                                           |   |  |   |  |   |                                                             |   |  |                                                                                                                                                                                                                                                                       |   |                                             |   |  |   |  |   |                                                |   |  |
| 1                                                                                                                                                                              |                                                                                                                                                                                                                                                                              |   |                                               |   |  |   |  |   |                                                     |   |  |                                                                                                                                                                                                                                                                              |   |                                                  |   |  |   |  |   |                                                  |   |  |                                                                                                                                                                                                                                                                            |   |                                                 |   |  |   |  |   |                                                 |   |  |                                                                                                                                                                                                                                                                                                  |   |                                                           |   |  |   |  |   |                                                             |   |  |                                                                                                                                                                                                                                                                       |   |                                             |   |  |   |  |   |                                                |   |  |
| 5                                                                                                                                                                              | I strongly agree with this ethical standard                                                                                                                                                                                                                                  |   |                                               |   |  |   |  |   |                                                     |   |  |                                                                                                                                                                                                                                                                              |   |                                                  |   |  |   |  |   |                                                  |   |  |                                                                                                                                                                                                                                                                            |   |                                                 |   |  |   |  |   |                                                 |   |  |                                                                                                                                                                                                                                                                                                  |   |                                                           |   |  |   |  |   |                                                             |   |  |                                                                                                                                                                                                                                                                       |   |                                             |   |  |   |  |   |                                                |   |  |
| 4                                                                                                                                                                              |                                                                                                                                                                                                                                                                              |   |                                               |   |  |   |  |   |                                                     |   |  |                                                                                                                                                                                                                                                                              |   |                                                  |   |  |   |  |   |                                                  |   |  |                                                                                                                                                                                                                                                                            |   |                                                 |   |  |   |  |   |                                                 |   |  |                                                                                                                                                                                                                                                                                                  |   |                                                           |   |  |   |  |   |                                                             |   |  |                                                                                                                                                                                                                                                                       |   |                                             |   |  |   |  |   |                                                |   |  |
| 3                                                                                                                                                                              |                                                                                                                                                                                                                                                                              |   |                                               |   |  |   |  |   |                                                     |   |  |                                                                                                                                                                                                                                                                              |   |                                                  |   |  |   |  |   |                                                  |   |  |                                                                                                                                                                                                                                                                            |   |                                                 |   |  |   |  |   |                                                 |   |  |                                                                                                                                                                                                                                                                                                  |   |                                                           |   |  |   |  |   |                                                             |   |  |                                                                                                                                                                                                                                                                       |   |                                             |   |  |   |  |   |                                                |   |  |
| 2                                                                                                                                                                              | I strongly disagree with this ethical standard                                                                                                                                                                                                                               |   |                                               |   |  |   |  |   |                                                     |   |  |                                                                                                                                                                                                                                                                              |   |                                                  |   |  |   |  |   |                                                  |   |  |                                                                                                                                                                                                                                                                            |   |                                                 |   |  |   |  |   |                                                 |   |  |                                                                                                                                                                                                                                                                                                  |   |                                                           |   |  |   |  |   |                                                             |   |  |                                                                                                                                                                                                                                                                       |   |                                             |   |  |   |  |   |                                                |   |  |
| 1                                                                                                                                                                              |                                                                                                                                                                                                                                                                              |   |                                               |   |  |   |  |   |                                                     |   |  |                                                                                                                                                                                                                                                                              |   |                                                  |   |  |   |  |   |                                                  |   |  |                                                                                                                                                                                                                                                                            |   |                                                 |   |  |   |  |   |                                                 |   |  |                                                                                                                                                                                                                                                                                                  |   |                                                           |   |  |   |  |   |                                                             |   |  |                                                                                                                                                                                                                                                                       |   |                                             |   |  |   |  |   |                                                |   |  |
| 3. New prevention methods should be added to the prevention package based on consultation among all stakeholders.                                                              | <table border="1"> <tr><td>5</td><td>I am very familiar with this ethical standard</td></tr> <tr><td>4</td><td></td></tr> <tr><td>3</td><td></td></tr> <tr><td>2</td><td>I am not at all familiar with this ethical standard</td></tr> <tr><td>1</td><td></td></tr> </table> | 5 | I am very familiar with this ethical standard | 4 |  | 3 |  | 2 | I am not at all familiar with this ethical standard | 1 |  | <table border="1"> <tr><td>5</td><td>This ethical standard is very easy to understand</td></tr> <tr><td>4</td><td></td></tr> <tr><td>3</td><td></td></tr> <tr><td>2</td><td>This ethical standard is very hard to understand</td></tr> <tr><td>1</td><td></td></tr> </table> | 5 | This ethical standard is very easy to understand | 4 |  | 3 |  | 2 | This ethical standard is very hard to understand | 1 |  | <table border="1"> <tr><td>5</td><td>This ethical standard is very easy to implement</td></tr> <tr><td>4</td><td></td></tr> <tr><td>3</td><td></td></tr> <tr><td>2</td><td>This ethical standard is very hard to implement</td></tr> <tr><td>1</td><td></td></tr> </table> | 5 | This ethical standard is very easy to implement | 4 |  | 3 |  | 2 | This ethical standard is very hard to implement | 1 |  | <table border="1"> <tr><td>5</td><td>This ethical standard greatly protects trial participants</td></tr> <tr><td>4</td><td></td></tr> <tr><td>3</td><td></td></tr> <tr><td>2</td><td>This ethical standard minimally protects trial participants</td></tr> <tr><td>1</td><td></td></tr> </table> | 5 | This ethical standard greatly protects trial participants | 4 |  | 3 |  | 2 | This ethical standard minimally protects trial participants | 1 |  | <table border="1"> <tr><td>5</td><td>I strongly agree with this ethical standard</td></tr> <tr><td>4</td><td></td></tr> <tr><td>3</td><td></td></tr> <tr><td>2</td><td>I strongly disagree with this ethical standard</td></tr> <tr><td>1</td><td></td></tr> </table> | 5 | I strongly agree with this ethical standard | 4 |  | 3 |  | 2 | I strongly disagree with this ethical standard | 1 |  |
| 5                                                                                                                                                                              | I am very familiar with this ethical standard                                                                                                                                                                                                                                |   |                                               |   |  |   |  |   |                                                     |   |  |                                                                                                                                                                                                                                                                              |   |                                                  |   |  |   |  |   |                                                  |   |  |                                                                                                                                                                                                                                                                            |   |                                                 |   |  |   |  |   |                                                 |   |  |                                                                                                                                                                                                                                                                                                  |   |                                                           |   |  |   |  |   |                                                             |   |  |                                                                                                                                                                                                                                                                       |   |                                             |   |  |   |  |   |                                                |   |  |
| 4                                                                                                                                                                              |                                                                                                                                                                                                                                                                              |   |                                               |   |  |   |  |   |                                                     |   |  |                                                                                                                                                                                                                                                                              |   |                                                  |   |  |   |  |   |                                                  |   |  |                                                                                                                                                                                                                                                                            |   |                                                 |   |  |   |  |   |                                                 |   |  |                                                                                                                                                                                                                                                                                                  |   |                                                           |   |  |   |  |   |                                                             |   |  |                                                                                                                                                                                                                                                                       |   |                                             |   |  |   |  |   |                                                |   |  |
| 3                                                                                                                                                                              |                                                                                                                                                                                                                                                                              |   |                                               |   |  |   |  |   |                                                     |   |  |                                                                                                                                                                                                                                                                              |   |                                                  |   |  |   |  |   |                                                  |   |  |                                                                                                                                                                                                                                                                            |   |                                                 |   |  |   |  |   |                                                 |   |  |                                                                                                                                                                                                                                                                                                  |   |                                                           |   |  |   |  |   |                                                             |   |  |                                                                                                                                                                                                                                                                       |   |                                             |   |  |   |  |   |                                                |   |  |
| 2                                                                                                                                                                              | I am not at all familiar with this ethical standard                                                                                                                                                                                                                          |   |                                               |   |  |   |  |   |                                                     |   |  |                                                                                                                                                                                                                                                                              |   |                                                  |   |  |   |  |   |                                                  |   |  |                                                                                                                                                                                                                                                                            |   |                                                 |   |  |   |  |   |                                                 |   |  |                                                                                                                                                                                                                                                                                                  |   |                                                           |   |  |   |  |   |                                                             |   |  |                                                                                                                                                                                                                                                                       |   |                                             |   |  |   |  |   |                                                |   |  |
| 1                                                                                                                                                                              |                                                                                                                                                                                                                                                                              |   |                                               |   |  |   |  |   |                                                     |   |  |                                                                                                                                                                                                                                                                              |   |                                                  |   |  |   |  |   |                                                  |   |  |                                                                                                                                                                                                                                                                            |   |                                                 |   |  |   |  |   |                                                 |   |  |                                                                                                                                                                                                                                                                                                  |   |                                                           |   |  |   |  |   |                                                             |   |  |                                                                                                                                                                                                                                                                       |   |                                             |   |  |   |  |   |                                                |   |  |
| 5                                                                                                                                                                              | This ethical standard is very easy to understand                                                                                                                                                                                                                             |   |                                               |   |  |   |  |   |                                                     |   |  |                                                                                                                                                                                                                                                                              |   |                                                  |   |  |   |  |   |                                                  |   |  |                                                                                                                                                                                                                                                                            |   |                                                 |   |  |   |  |   |                                                 |   |  |                                                                                                                                                                                                                                                                                                  |   |                                                           |   |  |   |  |   |                                                             |   |  |                                                                                                                                                                                                                                                                       |   |                                             |   |  |   |  |   |                                                |   |  |
| 4                                                                                                                                                                              |                                                                                                                                                                                                                                                                              |   |                                               |   |  |   |  |   |                                                     |   |  |                                                                                                                                                                                                                                                                              |   |                                                  |   |  |   |  |   |                                                  |   |  |                                                                                                                                                                                                                                                                            |   |                                                 |   |  |   |  |   |                                                 |   |  |                                                                                                                                                                                                                                                                                                  |   |                                                           |   |  |   |  |   |                                                             |   |  |                                                                                                                                                                                                                                                                       |   |                                             |   |  |   |  |   |                                                |   |  |
| 3                                                                                                                                                                              |                                                                                                                                                                                                                                                                              |   |                                               |   |  |   |  |   |                                                     |   |  |                                                                                                                                                                                                                                                                              |   |                                                  |   |  |   |  |   |                                                  |   |  |                                                                                                                                                                                                                                                                            |   |                                                 |   |  |   |  |   |                                                 |   |  |                                                                                                                                                                                                                                                                                                  |   |                                                           |   |  |   |  |   |                                                             |   |  |                                                                                                                                                                                                                                                                       |   |                                             |   |  |   |  |   |                                                |   |  |
| 2                                                                                                                                                                              | This ethical standard is very hard to understand                                                                                                                                                                                                                             |   |                                               |   |  |   |  |   |                                                     |   |  |                                                                                                                                                                                                                                                                              |   |                                                  |   |  |   |  |   |                                                  |   |  |                                                                                                                                                                                                                                                                            |   |                                                 |   |  |   |  |   |                                                 |   |  |                                                                                                                                                                                                                                                                                                  |   |                                                           |   |  |   |  |   |                                                             |   |  |                                                                                                                                                                                                                                                                       |   |                                             |   |  |   |  |   |                                                |   |  |
| 1                                                                                                                                                                              |                                                                                                                                                                                                                                                                              |   |                                               |   |  |   |  |   |                                                     |   |  |                                                                                                                                                                                                                                                                              |   |                                                  |   |  |   |  |   |                                                  |   |  |                                                                                                                                                                                                                                                                            |   |                                                 |   |  |   |  |   |                                                 |   |  |                                                                                                                                                                                                                                                                                                  |   |                                                           |   |  |   |  |   |                                                             |   |  |                                                                                                                                                                                                                                                                       |   |                                             |   |  |   |  |   |                                                |   |  |
| 5                                                                                                                                                                              | This ethical standard is very easy to implement                                                                                                                                                                                                                              |   |                                               |   |  |   |  |   |                                                     |   |  |                                                                                                                                                                                                                                                                              |   |                                                  |   |  |   |  |   |                                                  |   |  |                                                                                                                                                                                                                                                                            |   |                                                 |   |  |   |  |   |                                                 |   |  |                                                                                                                                                                                                                                                                                                  |   |                                                           |   |  |   |  |   |                                                             |   |  |                                                                                                                                                                                                                                                                       |   |                                             |   |  |   |  |   |                                                |   |  |
| 4                                                                                                                                                                              |                                                                                                                                                                                                                                                                              |   |                                               |   |  |   |  |   |                                                     |   |  |                                                                                                                                                                                                                                                                              |   |                                                  |   |  |   |  |   |                                                  |   |  |                                                                                                                                                                                                                                                                            |   |                                                 |   |  |   |  |   |                                                 |   |  |                                                                                                                                                                                                                                                                                                  |   |                                                           |   |  |   |  |   |                                                             |   |  |                                                                                                                                                                                                                                                                       |   |                                             |   |  |   |  |   |                                                |   |  |
| 3                                                                                                                                                                              |                                                                                                                                                                                                                                                                              |   |                                               |   |  |   |  |   |                                                     |   |  |                                                                                                                                                                                                                                                                              |   |                                                  |   |  |   |  |   |                                                  |   |  |                                                                                                                                                                                                                                                                            |   |                                                 |   |  |   |  |   |                                                 |   |  |                                                                                                                                                                                                                                                                                                  |   |                                                           |   |  |   |  |   |                                                             |   |  |                                                                                                                                                                                                                                                                       |   |                                             |   |  |   |  |   |                                                |   |  |
| 2                                                                                                                                                                              | This ethical standard is very hard to implement                                                                                                                                                                                                                              |   |                                               |   |  |   |  |   |                                                     |   |  |                                                                                                                                                                                                                                                                              |   |                                                  |   |  |   |  |   |                                                  |   |  |                                                                                                                                                                                                                                                                            |   |                                                 |   |  |   |  |   |                                                 |   |  |                                                                                                                                                                                                                                                                                                  |   |                                                           |   |  |   |  |   |                                                             |   |  |                                                                                                                                                                                                                                                                       |   |                                             |   |  |   |  |   |                                                |   |  |
| 1                                                                                                                                                                              |                                                                                                                                                                                                                                                                              |   |                                               |   |  |   |  |   |                                                     |   |  |                                                                                                                                                                                                                                                                              |   |                                                  |   |  |   |  |   |                                                  |   |  |                                                                                                                                                                                                                                                                            |   |                                                 |   |  |   |  |   |                                                 |   |  |                                                                                                                                                                                                                                                                                                  |   |                                                           |   |  |   |  |   |                                                             |   |  |                                                                                                                                                                                                                                                                       |   |                                             |   |  |   |  |   |                                                |   |  |
| 5                                                                                                                                                                              | This ethical standard greatly protects trial participants                                                                                                                                                                                                                    |   |                                               |   |  |   |  |   |                                                     |   |  |                                                                                                                                                                                                                                                                              |   |                                                  |   |  |   |  |   |                                                  |   |  |                                                                                                                                                                                                                                                                            |   |                                                 |   |  |   |  |   |                                                 |   |  |                                                                                                                                                                                                                                                                                                  |   |                                                           |   |  |   |  |   |                                                             |   |  |                                                                                                                                                                                                                                                                       |   |                                             |   |  |   |  |   |                                                |   |  |
| 4                                                                                                                                                                              |                                                                                                                                                                                                                                                                              |   |                                               |   |  |   |  |   |                                                     |   |  |                                                                                                                                                                                                                                                                              |   |                                                  |   |  |   |  |   |                                                  |   |  |                                                                                                                                                                                                                                                                            |   |                                                 |   |  |   |  |   |                                                 |   |  |                                                                                                                                                                                                                                                                                                  |   |                                                           |   |  |   |  |   |                                                             |   |  |                                                                                                                                                                                                                                                                       |   |                                             |   |  |   |  |   |                                                |   |  |
| 3                                                                                                                                                                              |                                                                                                                                                                                                                                                                              |   |                                               |   |  |   |  |   |                                                     |   |  |                                                                                                                                                                                                                                                                              |   |                                                  |   |  |   |  |   |                                                  |   |  |                                                                                                                                                                                                                                                                            |   |                                                 |   |  |   |  |   |                                                 |   |  |                                                                                                                                                                                                                                                                                                  |   |                                                           |   |  |   |  |   |                                                             |   |  |                                                                                                                                                                                                                                                                       |   |                                             |   |  |   |  |   |                                                |   |  |
| 2                                                                                                                                                                              | This ethical standard minimally protects trial participants                                                                                                                                                                                                                  |   |                                               |   |  |   |  |   |                                                     |   |  |                                                                                                                                                                                                                                                                              |   |                                                  |   |  |   |  |   |                                                  |   |  |                                                                                                                                                                                                                                                                            |   |                                                 |   |  |   |  |   |                                                 |   |  |                                                                                                                                                                                                                                                                                                  |   |                                                           |   |  |   |  |   |                                                             |   |  |                                                                                                                                                                                                                                                                       |   |                                             |   |  |   |  |   |                                                |   |  |
| 1                                                                                                                                                                              |                                                                                                                                                                                                                                                                              |   |                                               |   |  |   |  |   |                                                     |   |  |                                                                                                                                                                                                                                                                              |   |                                                  |   |  |   |  |   |                                                  |   |  |                                                                                                                                                                                                                                                                            |   |                                                 |   |  |   |  |   |                                                 |   |  |                                                                                                                                                                                                                                                                                                  |   |                                                           |   |  |   |  |   |                                                             |   |  |                                                                                                                                                                                                                                                                       |   |                                             |   |  |   |  |   |                                                |   |  |
| 5                                                                                                                                                                              | I strongly agree with this ethical standard                                                                                                                                                                                                                                  |   |                                               |   |  |   |  |   |                                                     |   |  |                                                                                                                                                                                                                                                                              |   |                                                  |   |  |   |  |   |                                                  |   |  |                                                                                                                                                                                                                                                                            |   |                                                 |   |  |   |  |   |                                                 |   |  |                                                                                                                                                                                                                                                                                                  |   |                                                           |   |  |   |  |   |                                                             |   |  |                                                                                                                                                                                                                                                                       |   |                                             |   |  |   |  |   |                                                |   |  |
| 4                                                                                                                                                                              |                                                                                                                                                                                                                                                                              |   |                                               |   |  |   |  |   |                                                     |   |  |                                                                                                                                                                                                                                                                              |   |                                                  |   |  |   |  |   |                                                  |   |  |                                                                                                                                                                                                                                                                            |   |                                                 |   |  |   |  |   |                                                 |   |  |                                                                                                                                                                                                                                                                                                  |   |                                                           |   |  |   |  |   |                                                             |   |  |                                                                                                                                                                                                                                                                       |   |                                             |   |  |   |  |   |                                                |   |  |
| 3                                                                                                                                                                              |                                                                                                                                                                                                                                                                              |   |                                               |   |  |   |  |   |                                                     |   |  |                                                                                                                                                                                                                                                                              |   |                                                  |   |  |   |  |   |                                                  |   |  |                                                                                                                                                                                                                                                                            |   |                                                 |   |  |   |  |   |                                                 |   |  |                                                                                                                                                                                                                                                                                                  |   |                                                           |   |  |   |  |   |                                                             |   |  |                                                                                                                                                                                                                                                                       |   |                                             |   |  |   |  |   |                                                |   |  |
| 2                                                                                                                                                                              | I strongly disagree with this ethical standard                                                                                                                                                                                                                               |   |                                               |   |  |   |  |   |                                                     |   |  |                                                                                                                                                                                                                                                                              |   |                                                  |   |  |   |  |   |                                                  |   |  |                                                                                                                                                                                                                                                                            |   |                                                 |   |  |   |  |   |                                                 |   |  |                                                                                                                                                                                                                                                                                                  |   |                                                           |   |  |   |  |   |                                                             |   |  |                                                                                                                                                                                                                                                                       |   |                                             |   |  |   |  |   |                                                |   |  |
| 1                                                                                                                                                                              |                                                                                                                                                                                                                                                                              |   |                                               |   |  |   |  |   |                                                     |   |  |                                                                                                                                                                                                                                                                              |   |                                                  |   |  |   |  |   |                                                  |   |  |                                                                                                                                                                                                                                                                            |   |                                                 |   |  |   |  |   |                                                 |   |  |                                                                                                                                                                                                                                                                                                  |   |                                                           |   |  |   |  |   |                                                             |   |  |                                                                                                                                                                                                                                                                       |   |                                             |   |  |   |  |   |                                                |   |  |
| 4. The protocol should describe how stakeholders will negotiate adding new methods to the risk reduction package.                                                              | <table border="1"> <tr><td>5</td><td>I am very familiar with this ethical standard</td></tr> <tr><td>4</td><td></td></tr> <tr><td>3</td><td></td></tr> <tr><td>2</td><td>I am not at all familiar with this ethical standard</td></tr> <tr><td>1</td><td></td></tr> </table> | 5 | I am very familiar with this ethical standard | 4 |  | 3 |  | 2 | I am not at all familiar with this ethical standard | 1 |  | <table border="1"> <tr><td>5</td><td>This ethical standard is very easy to understand</td></tr> <tr><td>4</td><td></td></tr> <tr><td>3</td><td></td></tr> <tr><td>2</td><td>This ethical standard is very hard to understand</td></tr> <tr><td>1</td><td></td></tr> </table> | 5 | This ethical standard is very easy to understand | 4 |  | 3 |  | 2 | This ethical standard is very hard to understand | 1 |  | <table border="1"> <tr><td>5</td><td>This ethical standard is very easy to implement</td></tr> <tr><td>4</td><td></td></tr> <tr><td>3</td><td></td></tr> <tr><td>2</td><td>This ethical standard is very hard to implement</td></tr> <tr><td>1</td><td></td></tr> </table> | 5 | This ethical standard is very easy to implement | 4 |  | 3 |  | 2 | This ethical standard is very hard to implement | 1 |  | <table border="1"> <tr><td>5</td><td>This ethical standard greatly protects trial participants</td></tr> <tr><td>4</td><td></td></tr> <tr><td>3</td><td></td></tr> <tr><td>2</td><td>This ethical standard minimally protects trial participants</td></tr> <tr><td>1</td><td></td></tr> </table> | 5 | This ethical standard greatly protects trial participants | 4 |  | 3 |  | 2 | This ethical standard minimally protects trial participants | 1 |  | <table border="1"> <tr><td>5</td><td>I strongly agree with this ethical standard</td></tr> <tr><td>4</td><td></td></tr> <tr><td>3</td><td></td></tr> <tr><td>2</td><td>I strongly disagree with this ethical standard</td></tr> <tr><td>1</td><td></td></tr> </table> | 5 | I strongly agree with this ethical standard | 4 |  | 3 |  | 2 | I strongly disagree with this ethical standard | 1 |  |
| 5                                                                                                                                                                              | I am very familiar with this ethical standard                                                                                                                                                                                                                                |   |                                               |   |  |   |  |   |                                                     |   |  |                                                                                                                                                                                                                                                                              |   |                                                  |   |  |   |  |   |                                                  |   |  |                                                                                                                                                                                                                                                                            |   |                                                 |   |  |   |  |   |                                                 |   |  |                                                                                                                                                                                                                                                                                                  |   |                                                           |   |  |   |  |   |                                                             |   |  |                                                                                                                                                                                                                                                                       |   |                                             |   |  |   |  |   |                                                |   |  |
| 4                                                                                                                                                                              |                                                                                                                                                                                                                                                                              |   |                                               |   |  |   |  |   |                                                     |   |  |                                                                                                                                                                                                                                                                              |   |                                                  |   |  |   |  |   |                                                  |   |  |                                                                                                                                                                                                                                                                            |   |                                                 |   |  |   |  |   |                                                 |   |  |                                                                                                                                                                                                                                                                                                  |   |                                                           |   |  |   |  |   |                                                             |   |  |                                                                                                                                                                                                                                                                       |   |                                             |   |  |   |  |   |                                                |   |  |
| 3                                                                                                                                                                              |                                                                                                                                                                                                                                                                              |   |                                               |   |  |   |  |   |                                                     |   |  |                                                                                                                                                                                                                                                                              |   |                                                  |   |  |   |  |   |                                                  |   |  |                                                                                                                                                                                                                                                                            |   |                                                 |   |  |   |  |   |                                                 |   |  |                                                                                                                                                                                                                                                                                                  |   |                                                           |   |  |   |  |   |                                                             |   |  |                                                                                                                                                                                                                                                                       |   |                                             |   |  |   |  |   |                                                |   |  |
| 2                                                                                                                                                                              | I am not at all familiar with this ethical standard                                                                                                                                                                                                                          |   |                                               |   |  |   |  |   |                                                     |   |  |                                                                                                                                                                                                                                                                              |   |                                                  |   |  |   |  |   |                                                  |   |  |                                                                                                                                                                                                                                                                            |   |                                                 |   |  |   |  |   |                                                 |   |  |                                                                                                                                                                                                                                                                                                  |   |                                                           |   |  |   |  |   |                                                             |   |  |                                                                                                                                                                                                                                                                       |   |                                             |   |  |   |  |   |                                                |   |  |
| 1                                                                                                                                                                              |                                                                                                                                                                                                                                                                              |   |                                               |   |  |   |  |   |                                                     |   |  |                                                                                                                                                                                                                                                                              |   |                                                  |   |  |   |  |   |                                                  |   |  |                                                                                                                                                                                                                                                                            |   |                                                 |   |  |   |  |   |                                                 |   |  |                                                                                                                                                                                                                                                                                                  |   |                                                           |   |  |   |  |   |                                                             |   |  |                                                                                                                                                                                                                                                                       |   |                                             |   |  |   |  |   |                                                |   |  |
| 5                                                                                                                                                                              | This ethical standard is very easy to understand                                                                                                                                                                                                                             |   |                                               |   |  |   |  |   |                                                     |   |  |                                                                                                                                                                                                                                                                              |   |                                                  |   |  |   |  |   |                                                  |   |  |                                                                                                                                                                                                                                                                            |   |                                                 |   |  |   |  |   |                                                 |   |  |                                                                                                                                                                                                                                                                                                  |   |                                                           |   |  |   |  |   |                                                             |   |  |                                                                                                                                                                                                                                                                       |   |                                             |   |  |   |  |   |                                                |   |  |
| 4                                                                                                                                                                              |                                                                                                                                                                                                                                                                              |   |                                               |   |  |   |  |   |                                                     |   |  |                                                                                                                                                                                                                                                                              |   |                                                  |   |  |   |  |   |                                                  |   |  |                                                                                                                                                                                                                                                                            |   |                                                 |   |  |   |  |   |                                                 |   |  |                                                                                                                                                                                                                                                                                                  |   |                                                           |   |  |   |  |   |                                                             |   |  |                                                                                                                                                                                                                                                                       |   |                                             |   |  |   |  |   |                                                |   |  |
| 3                                                                                                                                                                              |                                                                                                                                                                                                                                                                              |   |                                               |   |  |   |  |   |                                                     |   |  |                                                                                                                                                                                                                                                                              |   |                                                  |   |  |   |  |   |                                                  |   |  |                                                                                                                                                                                                                                                                            |   |                                                 |   |  |   |  |   |                                                 |   |  |                                                                                                                                                                                                                                                                                                  |   |                                                           |   |  |   |  |   |                                                             |   |  |                                                                                                                                                                                                                                                                       |   |                                             |   |  |   |  |   |                                                |   |  |
| 2                                                                                                                                                                              | This ethical standard is very hard to understand                                                                                                                                                                                                                             |   |                                               |   |  |   |  |   |                                                     |   |  |                                                                                                                                                                                                                                                                              |   |                                                  |   |  |   |  |   |                                                  |   |  |                                                                                                                                                                                                                                                                            |   |                                                 |   |  |   |  |   |                                                 |   |  |                                                                                                                                                                                                                                                                                                  |   |                                                           |   |  |   |  |   |                                                             |   |  |                                                                                                                                                                                                                                                                       |   |                                             |   |  |   |  |   |                                                |   |  |
| 1                                                                                                                                                                              |                                                                                                                                                                                                                                                                              |   |                                               |   |  |   |  |   |                                                     |   |  |                                                                                                                                                                                                                                                                              |   |                                                  |   |  |   |  |   |                                                  |   |  |                                                                                                                                                                                                                                                                            |   |                                                 |   |  |   |  |   |                                                 |   |  |                                                                                                                                                                                                                                                                                                  |   |                                                           |   |  |   |  |   |                                                             |   |  |                                                                                                                                                                                                                                                                       |   |                                             |   |  |   |  |   |                                                |   |  |
| 5                                                                                                                                                                              | This ethical standard is very easy to implement                                                                                                                                                                                                                              |   |                                               |   |  |   |  |   |                                                     |   |  |                                                                                                                                                                                                                                                                              |   |                                                  |   |  |   |  |   |                                                  |   |  |                                                                                                                                                                                                                                                                            |   |                                                 |   |  |   |  |   |                                                 |   |  |                                                                                                                                                                                                                                                                                                  |   |                                                           |   |  |   |  |   |                                                             |   |  |                                                                                                                                                                                                                                                                       |   |                                             |   |  |   |  |   |                                                |   |  |
| 4                                                                                                                                                                              |                                                                                                                                                                                                                                                                              |   |                                               |   |  |   |  |   |                                                     |   |  |                                                                                                                                                                                                                                                                              |   |                                                  |   |  |   |  |   |                                                  |   |  |                                                                                                                                                                                                                                                                            |   |                                                 |   |  |   |  |   |                                                 |   |  |                                                                                                                                                                                                                                                                                                  |   |                                                           |   |  |   |  |   |                                                             |   |  |                                                                                                                                                                                                                                                                       |   |                                             |   |  |   |  |   |                                                |   |  |
| 3                                                                                                                                                                              |                                                                                                                                                                                                                                                                              |   |                                               |   |  |   |  |   |                                                     |   |  |                                                                                                                                                                                                                                                                              |   |                                                  |   |  |   |  |   |                                                  |   |  |                                                                                                                                                                                                                                                                            |   |                                                 |   |  |   |  |   |                                                 |   |  |                                                                                                                                                                                                                                                                                                  |   |                                                           |   |  |   |  |   |                                                             |   |  |                                                                                                                                                                                                                                                                       |   |                                             |   |  |   |  |   |                                                |   |  |
| 2                                                                                                                                                                              | This ethical standard is very hard to implement                                                                                                                                                                                                                              |   |                                               |   |  |   |  |   |                                                     |   |  |                                                                                                                                                                                                                                                                              |   |                                                  |   |  |   |  |   |                                                  |   |  |                                                                                                                                                                                                                                                                            |   |                                                 |   |  |   |  |   |                                                 |   |  |                                                                                                                                                                                                                                                                                                  |   |                                                           |   |  |   |  |   |                                                             |   |  |                                                                                                                                                                                                                                                                       |   |                                             |   |  |   |  |   |                                                |   |  |
| 1                                                                                                                                                                              |                                                                                                                                                                                                                                                                              |   |                                               |   |  |   |  |   |                                                     |   |  |                                                                                                                                                                                                                                                                              |   |                                                  |   |  |   |  |   |                                                  |   |  |                                                                                                                                                                                                                                                                            |   |                                                 |   |  |   |  |   |                                                 |   |  |                                                                                                                                                                                                                                                                                                  |   |                                                           |   |  |   |  |   |                                                             |   |  |                                                                                                                                                                                                                                                                       |   |                                             |   |  |   |  |   |                                                |   |  |
| 5                                                                                                                                                                              | This ethical standard greatly protects trial participants                                                                                                                                                                                                                    |   |                                               |   |  |   |  |   |                                                     |   |  |                                                                                                                                                                                                                                                                              |   |                                                  |   |  |   |  |   |                                                  |   |  |                                                                                                                                                                                                                                                                            |   |                                                 |   |  |   |  |   |                                                 |   |  |                                                                                                                                                                                                                                                                                                  |   |                                                           |   |  |   |  |   |                                                             |   |  |                                                                                                                                                                                                                                                                       |   |                                             |   |  |   |  |   |                                                |   |  |
| 4                                                                                                                                                                              |                                                                                                                                                                                                                                                                              |   |                                               |   |  |   |  |   |                                                     |   |  |                                                                                                                                                                                                                                                                              |   |                                                  |   |  |   |  |   |                                                  |   |  |                                                                                                                                                                                                                                                                            |   |                                                 |   |  |   |  |   |                                                 |   |  |                                                                                                                                                                                                                                                                                                  |   |                                                           |   |  |   |  |   |                                                             |   |  |                                                                                                                                                                                                                                                                       |   |                                             |   |  |   |  |   |                                                |   |  |
| 3                                                                                                                                                                              |                                                                                                                                                                                                                                                                              |   |                                               |   |  |   |  |   |                                                     |   |  |                                                                                                                                                                                                                                                                              |   |                                                  |   |  |   |  |   |                                                  |   |  |                                                                                                                                                                                                                                                                            |   |                                                 |   |  |   |  |   |                                                 |   |  |                                                                                                                                                                                                                                                                                                  |   |                                                           |   |  |   |  |   |                                                             |   |  |                                                                                                                                                                                                                                                                       |   |                                             |   |  |   |  |   |                                                |   |  |
| 2                                                                                                                                                                              | This ethical standard minimally protects trial participants                                                                                                                                                                                                                  |   |                                               |   |  |   |  |   |                                                     |   |  |                                                                                                                                                                                                                                                                              |   |                                                  |   |  |   |  |   |                                                  |   |  |                                                                                                                                                                                                                                                                            |   |                                                 |   |  |   |  |   |                                                 |   |  |                                                                                                                                                                                                                                                                                                  |   |                                                           |   |  |   |  |   |                                                             |   |  |                                                                                                                                                                                                                                                                       |   |                                             |   |  |   |  |   |                                                |   |  |
| 1                                                                                                                                                                              |                                                                                                                                                                                                                                                                              |   |                                               |   |  |   |  |   |                                                     |   |  |                                                                                                                                                                                                                                                                              |   |                                                  |   |  |   |  |   |                                                  |   |  |                                                                                                                                                                                                                                                                            |   |                                                 |   |  |   |  |   |                                                 |   |  |                                                                                                                                                                                                                                                                                                  |   |                                                           |   |  |   |  |   |                                                             |   |  |                                                                                                                                                                                                                                                                       |   |                                             |   |  |   |  |   |                                                |   |  |
| 5                                                                                                                                                                              | I strongly agree with this ethical standard                                                                                                                                                                                                                                  |   |                                               |   |  |   |  |   |                                                     |   |  |                                                                                                                                                                                                                                                                              |   |                                                  |   |  |   |  |   |                                                  |   |  |                                                                                                                                                                                                                                                                            |   |                                                 |   |  |   |  |   |                                                 |   |  |                                                                                                                                                                                                                                                                                                  |   |                                                           |   |  |   |  |   |                                                             |   |  |                                                                                                                                                                                                                                                                       |   |                                             |   |  |   |  |   |                                                |   |  |
| 4                                                                                                                                                                              |                                                                                                                                                                                                                                                                              |   |                                               |   |  |   |  |   |                                                     |   |  |                                                                                                                                                                                                                                                                              |   |                                                  |   |  |   |  |   |                                                  |   |  |                                                                                                                                                                                                                                                                            |   |                                                 |   |  |   |  |   |                                                 |   |  |                                                                                                                                                                                                                                                                                                  |   |                                                           |   |  |   |  |   |                                                             |   |  |                                                                                                                                                                                                                                                                       |   |                                             |   |  |   |  |   |                                                |   |  |
| 3                                                                                                                                                                              |                                                                                                                                                                                                                                                                              |   |                                               |   |  |   |  |   |                                                     |   |  |                                                                                                                                                                                                                                                                              |   |                                                  |   |  |   |  |   |                                                  |   |  |                                                                                                                                                                                                                                                                            |   |                                                 |   |  |   |  |   |                                                 |   |  |                                                                                                                                                                                                                                                                                                  |   |                                                           |   |  |   |  |   |                                                             |   |  |                                                                                                                                                                                                                                                                       |   |                                             |   |  |   |  |   |                                                |   |  |
| 2                                                                                                                                                                              | I strongly disagree with this ethical standard                                                                                                                                                                                                                               |   |                                               |   |  |   |  |   |                                                     |   |  |                                                                                                                                                                                                                                                                              |   |                                                  |   |  |   |  |   |                                                  |   |  |                                                                                                                                                                                                                                                                            |   |                                                 |   |  |   |  |   |                                                 |   |  |                                                                                                                                                                                                                                                                                                  |   |                                                           |   |  |   |  |   |                                                             |   |  |                                                                                                                                                                                                                                                                       |   |                                             |   |  |   |  |   |                                                |   |  |
| 1                                                                                                                                                                              |                                                                                                                                                                                                                                                                              |   |                                               |   |  |   |  |   |                                                     |   |  |                                                                                                                                                                                                                                                                              |   |                                                  |   |  |   |  |   |                                                  |   |  |                                                                                                                                                                                                                                                                            |   |                                                 |   |  |   |  |   |                                                 |   |  |                                                                                                                                                                                                                                                                                                  |   |                                                           |   |  |   |  |   |                                                             |   |  |                                                                                                                                                                                                                                                                       |   |                                             |   |  |   |  |   |                                                |   |  |
| 5. Trials should not be conducted when agreements have not been reached among all stakeholders regarding the standard of prevention.                                           | <table border="1"> <tr><td>5</td><td>I am very familiar with this ethical standard</td></tr> <tr><td>4</td><td></td></tr> <tr><td>3</td><td></td></tr> <tr><td>2</td><td>I am not at all familiar with this ethical standard</td></tr> <tr><td>1</td><td></td></tr> </table> | 5 | I am very familiar with this ethical standard | 4 |  | 3 |  | 2 | I am not at all familiar with this ethical standard | 1 |  | <table border="1"> <tr><td>5</td><td>This ethical standard is very easy to understand</td></tr> <tr><td>4</td><td></td></tr> <tr><td>3</td><td></td></tr> <tr><td>2</td><td>This ethical standard is very hard to understand</td></tr> <tr><td>1</td><td></td></tr> </table> | 5 | This ethical standard is very easy to understand | 4 |  | 3 |  | 2 | This ethical standard is very hard to understand | 1 |  | <table border="1"> <tr><td>5</td><td>This ethical standard is very easy to implement</td></tr> <tr><td>4</td><td></td></tr> <tr><td>3</td><td></td></tr> <tr><td>2</td><td>This ethical standard is very hard to implement</td></tr> <tr><td>1</td><td></td></tr> </table> | 5 | This ethical standard is very easy to implement | 4 |  | 3 |  | 2 | This ethical standard is very hard to implement | 1 |  | <table border="1"> <tr><td>5</td><td>This ethical standard greatly protects trial participants</td></tr> <tr><td>4</td><td></td></tr> <tr><td>3</td><td></td></tr> <tr><td>2</td><td>This ethical standard minimally protects trial participants</td></tr> <tr><td>1</td><td></td></tr> </table> | 5 | This ethical standard greatly protects trial participants | 4 |  | 3 |  | 2 | This ethical standard minimally protects trial participants | 1 |  | <table border="1"> <tr><td>5</td><td>I strongly agree with this ethical standard</td></tr> <tr><td>4</td><td></td></tr> <tr><td>3</td><td></td></tr> <tr><td>2</td><td>I strongly disagree with this ethical standard</td></tr> <tr><td>1</td><td></td></tr> </table> | 5 | I strongly agree with this ethical standard | 4 |  | 3 |  | 2 | I strongly disagree with this ethical standard | 1 |  |
| 5                                                                                                                                                                              | I am very familiar with this ethical standard                                                                                                                                                                                                                                |   |                                               |   |  |   |  |   |                                                     |   |  |                                                                                                                                                                                                                                                                              |   |                                                  |   |  |   |  |   |                                                  |   |  |                                                                                                                                                                                                                                                                            |   |                                                 |   |  |   |  |   |                                                 |   |  |                                                                                                                                                                                                                                                                                                  |   |                                                           |   |  |   |  |   |                                                             |   |  |                                                                                                                                                                                                                                                                       |   |                                             |   |  |   |  |   |                                                |   |  |
| 4                                                                                                                                                                              |                                                                                                                                                                                                                                                                              |   |                                               |   |  |   |  |   |                                                     |   |  |                                                                                                                                                                                                                                                                              |   |                                                  |   |  |   |  |   |                                                  |   |  |                                                                                                                                                                                                                                                                            |   |                                                 |   |  |   |  |   |                                                 |   |  |                                                                                                                                                                                                                                                                                                  |   |                                                           |   |  |   |  |   |                                                             |   |  |                                                                                                                                                                                                                                                                       |   |                                             |   |  |   |  |   |                                                |   |  |
| 3                                                                                                                                                                              |                                                                                                                                                                                                                                                                              |   |                                               |   |  |   |  |   |                                                     |   |  |                                                                                                                                                                                                                                                                              |   |                                                  |   |  |   |  |   |                                                  |   |  |                                                                                                                                                                                                                                                                            |   |                                                 |   |  |   |  |   |                                                 |   |  |                                                                                                                                                                                                                                                                                                  |   |                                                           |   |  |   |  |   |                                                             |   |  |                                                                                                                                                                                                                                                                       |   |                                             |   |  |   |  |   |                                                |   |  |
| 2                                                                                                                                                                              | I am not at all familiar with this ethical standard                                                                                                                                                                                                                          |   |                                               |   |  |   |  |   |                                                     |   |  |                                                                                                                                                                                                                                                                              |   |                                                  |   |  |   |  |   |                                                  |   |  |                                                                                                                                                                                                                                                                            |   |                                                 |   |  |   |  |   |                                                 |   |  |                                                                                                                                                                                                                                                                                                  |   |                                                           |   |  |   |  |   |                                                             |   |  |                                                                                                                                                                                                                                                                       |   |                                             |   |  |   |  |   |                                                |   |  |
| 1                                                                                                                                                                              |                                                                                                                                                                                                                                                                              |   |                                               |   |  |   |  |   |                                                     |   |  |                                                                                                                                                                                                                                                                              |   |                                                  |   |  |   |  |   |                                                  |   |  |                                                                                                                                                                                                                                                                            |   |                                                 |   |  |   |  |   |                                                 |   |  |                                                                                                                                                                                                                                                                                                  |   |                                                           |   |  |   |  |   |                                                             |   |  |                                                                                                                                                                                                                                                                       |   |                                             |   |  |   |  |   |                                                |   |  |
| 5                                                                                                                                                                              | This ethical standard is very easy to understand                                                                                                                                                                                                                             |   |                                               |   |  |   |  |   |                                                     |   |  |                                                                                                                                                                                                                                                                              |   |                                                  |   |  |   |  |   |                                                  |   |  |                                                                                                                                                                                                                                                                            |   |                                                 |   |  |   |  |   |                                                 |   |  |                                                                                                                                                                                                                                                                                                  |   |                                                           |   |  |   |  |   |                                                             |   |  |                                                                                                                                                                                                                                                                       |   |                                             |   |  |   |  |   |                                                |   |  |
| 4                                                                                                                                                                              |                                                                                                                                                                                                                                                                              |   |                                               |   |  |   |  |   |                                                     |   |  |                                                                                                                                                                                                                                                                              |   |                                                  |   |  |   |  |   |                                                  |   |  |                                                                                                                                                                                                                                                                            |   |                                                 |   |  |   |  |   |                                                 |   |  |                                                                                                                                                                                                                                                                                                  |   |                                                           |   |  |   |  |   |                                                             |   |  |                                                                                                                                                                                                                                                                       |   |                                             |   |  |   |  |   |                                                |   |  |
| 3                                                                                                                                                                              |                                                                                                                                                                                                                                                                              |   |                                               |   |  |   |  |   |                                                     |   |  |                                                                                                                                                                                                                                                                              |   |                                                  |   |  |   |  |   |                                                  |   |  |                                                                                                                                                                                                                                                                            |   |                                                 |   |  |   |  |   |                                                 |   |  |                                                                                                                                                                                                                                                                                                  |   |                                                           |   |  |   |  |   |                                                             |   |  |                                                                                                                                                                                                                                                                       |   |                                             |   |  |   |  |   |                                                |   |  |
| 2                                                                                                                                                                              | This ethical standard is very hard to understand                                                                                                                                                                                                                             |   |                                               |   |  |   |  |   |                                                     |   |  |                                                                                                                                                                                                                                                                              |   |                                                  |   |  |   |  |   |                                                  |   |  |                                                                                                                                                                                                                                                                            |   |                                                 |   |  |   |  |   |                                                 |   |  |                                                                                                                                                                                                                                                                                                  |   |                                                           |   |  |   |  |   |                                                             |   |  |                                                                                                                                                                                                                                                                       |   |                                             |   |  |   |  |   |                                                |   |  |
| 1                                                                                                                                                                              |                                                                                                                                                                                                                                                                              |   |                                               |   |  |   |  |   |                                                     |   |  |                                                                                                                                                                                                                                                                              |   |                                                  |   |  |   |  |   |                                                  |   |  |                                                                                                                                                                                                                                                                            |   |                                                 |   |  |   |  |   |                                                 |   |  |                                                                                                                                                                                                                                                                                                  |   |                                                           |   |  |   |  |   |                                                             |   |  |                                                                                                                                                                                                                                                                       |   |                                             |   |  |   |  |   |                                                |   |  |
| 5                                                                                                                                                                              | This ethical standard is very easy to implement                                                                                                                                                                                                                              |   |                                               |   |  |   |  |   |                                                     |   |  |                                                                                                                                                                                                                                                                              |   |                                                  |   |  |   |  |   |                                                  |   |  |                                                                                                                                                                                                                                                                            |   |                                                 |   |  |   |  |   |                                                 |   |  |                                                                                                                                                                                                                                                                                                  |   |                                                           |   |  |   |  |   |                                                             |   |  |                                                                                                                                                                                                                                                                       |   |                                             |   |  |   |  |   |                                                |   |  |
| 4                                                                                                                                                                              |                                                                                                                                                                                                                                                                              |   |                                               |   |  |   |  |   |                                                     |   |  |                                                                                                                                                                                                                                                                              |   |                                                  |   |  |   |  |   |                                                  |   |  |                                                                                                                                                                                                                                                                            |   |                                                 |   |  |   |  |   |                                                 |   |  |                                                                                                                                                                                                                                                                                                  |   |                                                           |   |  |   |  |   |                                                             |   |  |                                                                                                                                                                                                                                                                       |   |                                             |   |  |   |  |   |                                                |   |  |
| 3                                                                                                                                                                              |                                                                                                                                                                                                                                                                              |   |                                               |   |  |   |  |   |                                                     |   |  |                                                                                                                                                                                                                                                                              |   |                                                  |   |  |   |  |   |                                                  |   |  |                                                                                                                                                                                                                                                                            |   |                                                 |   |  |   |  |   |                                                 |   |  |                                                                                                                                                                                                                                                                                                  |   |                                                           |   |  |   |  |   |                                                             |   |  |                                                                                                                                                                                                                                                                       |   |                                             |   |  |   |  |   |                                                |   |  |
| 2                                                                                                                                                                              | This ethical standard is very hard to implement                                                                                                                                                                                                                              |   |                                               |   |  |   |  |   |                                                     |   |  |                                                                                                                                                                                                                                                                              |   |                                                  |   |  |   |  |   |                                                  |   |  |                                                                                                                                                                                                                                                                            |   |                                                 |   |  |   |  |   |                                                 |   |  |                                                                                                                                                                                                                                                                                                  |   |                                                           |   |  |   |  |   |                                                             |   |  |                                                                                                                                                                                                                                                                       |   |                                             |   |  |   |  |   |                                                |   |  |
| 1                                                                                                                                                                              |                                                                                                                                                                                                                                                                              |   |                                               |   |  |   |  |   |                                                     |   |  |                                                                                                                                                                                                                                                                              |   |                                                  |   |  |   |  |   |                                                  |   |  |                                                                                                                                                                                                                                                                            |   |                                                 |   |  |   |  |   |                                                 |   |  |                                                                                                                                                                                                                                                                                                  |   |                                                           |   |  |   |  |   |                                                             |   |  |                                                                                                                                                                                                                                                                       |   |                                             |   |  |   |  |   |                                                |   |  |
| 5                                                                                                                                                                              | This ethical standard greatly protects trial participants                                                                                                                                                                                                                    |   |                                               |   |  |   |  |   |                                                     |   |  |                                                                                                                                                                                                                                                                              |   |                                                  |   |  |   |  |   |                                                  |   |  |                                                                                                                                                                                                                                                                            |   |                                                 |   |  |   |  |   |                                                 |   |  |                                                                                                                                                                                                                                                                                                  |   |                                                           |   |  |   |  |   |                                                             |   |  |                                                                                                                                                                                                                                                                       |   |                                             |   |  |   |  |   |                                                |   |  |
| 4                                                                                                                                                                              |                                                                                                                                                                                                                                                                              |   |                                               |   |  |   |  |   |                                                     |   |  |                                                                                                                                                                                                                                                                              |   |                                                  |   |  |   |  |   |                                                  |   |  |                                                                                                                                                                                                                                                                            |   |                                                 |   |  |   |  |   |                                                 |   |  |                                                                                                                                                                                                                                                                                                  |   |                                                           |   |  |   |  |   |                                                             |   |  |                                                                                                                                                                                                                                                                       |   |                                             |   |  |   |  |   |                                                |   |  |
| 3                                                                                                                                                                              |                                                                                                                                                                                                                                                                              |   |                                               |   |  |   |  |   |                                                     |   |  |                                                                                                                                                                                                                                                                              |   |                                                  |   |  |   |  |   |                                                  |   |  |                                                                                                                                                                                                                                                                            |   |                                                 |   |  |   |  |   |                                                 |   |  |                                                                                                                                                                                                                                                                                                  |   |                                                           |   |  |   |  |   |                                                             |   |  |                                                                                                                                                                                                                                                                       |   |                                             |   |  |   |  |   |                                                |   |  |
| 2                                                                                                                                                                              | This ethical standard minimally protects trial participants                                                                                                                                                                                                                  |   |                                               |   |  |   |  |   |                                                     |   |  |                                                                                                                                                                                                                                                                              |   |                                                  |   |  |   |  |   |                                                  |   |  |                                                                                                                                                                                                                                                                            |   |                                                 |   |  |   |  |   |                                                 |   |  |                                                                                                                                                                                                                                                                                                  |   |                                                           |   |  |   |  |   |                                                             |   |  |                                                                                                                                                                                                                                                                       |   |                                             |   |  |   |  |   |                                                |   |  |
| 1                                                                                                                                                                              |                                                                                                                                                                                                                                                                              |   |                                               |   |  |   |  |   |                                                     |   |  |                                                                                                                                                                                                                                                                              |   |                                                  |   |  |   |  |   |                                                  |   |  |                                                                                                                                                                                                                                                                            |   |                                                 |   |  |   |  |   |                                                 |   |  |                                                                                                                                                                                                                                                                                                  |   |                                                           |   |  |   |  |   |                                                             |   |  |                                                                                                                                                                                                                                                                       |   |                                             |   |  |   |  |   |                                                |   |  |
| 5                                                                                                                                                                              | I strongly agree with this ethical standard                                                                                                                                                                                                                                  |   |                                               |   |  |   |  |   |                                                     |   |  |                                                                                                                                                                                                                                                                              |   |                                                  |   |  |   |  |   |                                                  |   |  |                                                                                                                                                                                                                                                                            |   |                                                 |   |  |   |  |   |                                                 |   |  |                                                                                                                                                                                                                                                                                                  |   |                                                           |   |  |   |  |   |                                                             |   |  |                                                                                                                                                                                                                                                                       |   |                                             |   |  |   |  |   |                                                |   |  |
| 4                                                                                                                                                                              |                                                                                                                                                                                                                                                                              |   |                                               |   |  |   |  |   |                                                     |   |  |                                                                                                                                                                                                                                                                              |   |                                                  |   |  |   |  |   |                                                  |   |  |                                                                                                                                                                                                                                                                            |   |                                                 |   |  |   |  |   |                                                 |   |  |                                                                                                                                                                                                                                                                                                  |   |                                                           |   |  |   |  |   |                                                             |   |  |                                                                                                                                                                                                                                                                       |   |                                             |   |  |   |  |   |                                                |   |  |
| 3                                                                                                                                                                              |                                                                                                                                                                                                                                                                              |   |                                               |   |  |   |  |   |                                                     |   |  |                                                                                                                                                                                                                                                                              |   |                                                  |   |  |   |  |   |                                                  |   |  |                                                                                                                                                                                                                                                                            |   |                                                 |   |  |   |  |   |                                                 |   |  |                                                                                                                                                                                                                                                                                                  |   |                                                           |   |  |   |  |   |                                                             |   |  |                                                                                                                                                                                                                                                                       |   |                                             |   |  |   |  |   |                                                |   |  |
| 2                                                                                                                                                                              | I strongly disagree with this ethical standard                                                                                                                                                                                                                               |   |                                               |   |  |   |  |   |                                                     |   |  |                                                                                                                                                                                                                                                                              |   |                                                  |   |  |   |  |   |                                                  |   |  |                                                                                                                                                                                                                                                                            |   |                                                 |   |  |   |  |   |                                                 |   |  |                                                                                                                                                                                                                                                                                                  |   |                                                           |   |  |   |  |   |                                                             |   |  |                                                                                                                                                                                                                                                                       |   |                                             |   |  |   |  |   |                                                |   |  |
| 1                                                                                                                                                                              |                                                                                                                                                                                                                                                                              |   |                                               |   |  |   |  |   |                                                     |   |  |                                                                                                                                                                                                                                                                              |   |                                                  |   |  |   |  |   |                                                  |   |  |                                                                                                                                                                                                                                                                            |   |                                                 |   |  |   |  |   |                                                 |   |  |                                                                                                                                                                                                                                                                                                  |   |                                                           |   |  |   |  |   |                                                             |   |  |                                                                                                                                                                                                                                                                       |   |                                             |   |  |   |  |   |                                                |   |  |
| 6. Communities should be meaningfully involved in determining the type, scope, and duration of HIV prevention services that will be available to participants and communities. | <table border="1"> <tr><td>5</td><td>I am very familiar with this ethical standard</td></tr> <tr><td>4</td><td></td></tr> <tr><td>3</td><td></td></tr> <tr><td>2</td><td>I am not at all familiar with this ethical standard</td></tr> <tr><td>1</td><td></td></tr> </table> | 5 | I am very familiar with this ethical standard | 4 |  | 3 |  | 2 | I am not at all familiar with this ethical standard | 1 |  | <table border="1"> <tr><td>5</td><td>This ethical standard is very easy to understand</td></tr> <tr><td>4</td><td></td></tr> <tr><td>3</td><td></td></tr> <tr><td>2</td><td>This ethical standard is very hard to understand</td></tr> <tr><td>1</td><td></td></tr> </table> | 5 | This ethical standard is very easy to understand | 4 |  | 3 |  | 2 | This ethical standard is very hard to understand | 1 |  | <table border="1"> <tr><td>5</td><td>This ethical standard is very easy to implement</td></tr> <tr><td>4</td><td></td></tr> <tr><td>3</td><td></td></tr> <tr><td>2</td><td>This ethical standard is very hard to implement</td></tr> <tr><td>1</td><td></td></tr> </table> | 5 | This ethical standard is very easy to implement | 4 |  | 3 |  | 2 | This ethical standard is very hard to implement | 1 |  | <table border="1"> <tr><td>5</td><td>This ethical standard greatly protects trial participants</td></tr> <tr><td>4</td><td></td></tr> <tr><td>3</td><td></td></tr> <tr><td>2</td><td>This ethical standard minimally protects trial participants</td></tr> <tr><td>1</td><td></td></tr> </table> | 5 | This ethical standard greatly protects trial participants | 4 |  | 3 |  | 2 | This ethical standard minimally protects trial participants | 1 |  | <table border="1"> <tr><td>5</td><td>I strongly agree with this ethical standard</td></tr> <tr><td>4</td><td></td></tr> <tr><td>3</td><td></td></tr> <tr><td>2</td><td>I strongly disagree with this ethical standard</td></tr> <tr><td>1</td><td></td></tr> </table> | 5 | I strongly agree with this ethical standard | 4 |  | 3 |  | 2 | I strongly disagree with this ethical standard | 1 |  |
| 5                                                                                                                                                                              | I am very familiar with this ethical standard                                                                                                                                                                                                                                |   |                                               |   |  |   |  |   |                                                     |   |  |                                                                                                                                                                                                                                                                              |   |                                                  |   |  |   |  |   |                                                  |   |  |                                                                                                                                                                                                                                                                            |   |                                                 |   |  |   |  |   |                                                 |   |  |                                                                                                                                                                                                                                                                                                  |   |                                                           |   |  |   |  |   |                                                             |   |  |                                                                                                                                                                                                                                                                       |   |                                             |   |  |   |  |   |                                                |   |  |
| 4                                                                                                                                                                              |                                                                                                                                                                                                                                                                              |   |                                               |   |  |   |  |   |                                                     |   |  |                                                                                                                                                                                                                                                                              |   |                                                  |   |  |   |  |   |                                                  |   |  |                                                                                                                                                                                                                                                                            |   |                                                 |   |  |   |  |   |                                                 |   |  |                                                                                                                                                                                                                                                                                                  |   |                                                           |   |  |   |  |   |                                                             |   |  |                                                                                                                                                                                                                                                                       |   |                                             |   |  |   |  |   |                                                |   |  |
| 3                                                                                                                                                                              |                                                                                                                                                                                                                                                                              |   |                                               |   |  |   |  |   |                                                     |   |  |                                                                                                                                                                                                                                                                              |   |                                                  |   |  |   |  |   |                                                  |   |  |                                                                                                                                                                                                                                                                            |   |                                                 |   |  |   |  |   |                                                 |   |  |                                                                                                                                                                                                                                                                                                  |   |                                                           |   |  |   |  |   |                                                             |   |  |                                                                                                                                                                                                                                                                       |   |                                             |   |  |   |  |   |                                                |   |  |
| 2                                                                                                                                                                              | I am not at all familiar with this ethical standard                                                                                                                                                                                                                          |   |                                               |   |  |   |  |   |                                                     |   |  |                                                                                                                                                                                                                                                                              |   |                                                  |   |  |   |  |   |                                                  |   |  |                                                                                                                                                                                                                                                                            |   |                                                 |   |  |   |  |   |                                                 |   |  |                                                                                                                                                                                                                                                                                                  |   |                                                           |   |  |   |  |   |                                                             |   |  |                                                                                                                                                                                                                                                                       |   |                                             |   |  |   |  |   |                                                |   |  |
| 1                                                                                                                                                                              |                                                                                                                                                                                                                                                                              |   |                                               |   |  |   |  |   |                                                     |   |  |                                                                                                                                                                                                                                                                              |   |                                                  |   |  |   |  |   |                                                  |   |  |                                                                                                                                                                                                                                                                            |   |                                                 |   |  |   |  |   |                                                 |   |  |                                                                                                                                                                                                                                                                                                  |   |                                                           |   |  |   |  |   |                                                             |   |  |                                                                                                                                                                                                                                                                       |   |                                             |   |  |   |  |   |                                                |   |  |
| 5                                                                                                                                                                              | This ethical standard is very easy to understand                                                                                                                                                                                                                             |   |                                               |   |  |   |  |   |                                                     |   |  |                                                                                                                                                                                                                                                                              |   |                                                  |   |  |   |  |   |                                                  |   |  |                                                                                                                                                                                                                                                                            |   |                                                 |   |  |   |  |   |                                                 |   |  |                                                                                                                                                                                                                                                                                                  |   |                                                           |   |  |   |  |   |                                                             |   |  |                                                                                                                                                                                                                                                                       |   |                                             |   |  |   |  |   |                                                |   |  |
| 4                                                                                                                                                                              |                                                                                                                                                                                                                                                                              |   |                                               |   |  |   |  |   |                                                     |   |  |                                                                                                                                                                                                                                                                              |   |                                                  |   |  |   |  |   |                                                  |   |  |                                                                                                                                                                                                                                                                            |   |                                                 |   |  |   |  |   |                                                 |   |  |                                                                                                                                                                                                                                                                                                  |   |                                                           |   |  |   |  |   |                                                             |   |  |                                                                                                                                                                                                                                                                       |   |                                             |   |  |   |  |   |                                                |   |  |
| 3                                                                                                                                                                              |                                                                                                                                                                                                                                                                              |   |                                               |   |  |   |  |   |                                                     |   |  |                                                                                                                                                                                                                                                                              |   |                                                  |   |  |   |  |   |                                                  |   |  |                                                                                                                                                                                                                                                                            |   |                                                 |   |  |   |  |   |                                                 |   |  |                                                                                                                                                                                                                                                                                                  |   |                                                           |   |  |   |  |   |                                                             |   |  |                                                                                                                                                                                                                                                                       |   |                                             |   |  |   |  |   |                                                |   |  |
| 2                                                                                                                                                                              | This ethical standard is very hard to understand                                                                                                                                                                                                                             |   |                                               |   |  |   |  |   |                                                     |   |  |                                                                                                                                                                                                                                                                              |   |                                                  |   |  |   |  |   |                                                  |   |  |                                                                                                                                                                                                                                                                            |   |                                                 |   |  |   |  |   |                                                 |   |  |                                                                                                                                                                                                                                                                                                  |   |                                                           |   |  |   |  |   |                                                             |   |  |                                                                                                                                                                                                                                                                       |   |                                             |   |  |   |  |   |                                                |   |  |
| 1                                                                                                                                                                              |                                                                                                                                                                                                                                                                              |   |                                               |   |  |   |  |   |                                                     |   |  |                                                                                                                                                                                                                                                                              |   |                                                  |   |  |   |  |   |                                                  |   |  |                                                                                                                                                                                                                                                                            |   |                                                 |   |  |   |  |   |                                                 |   |  |                                                                                                                                                                                                                                                                                                  |   |                                                           |   |  |   |  |   |                                                             |   |  |                                                                                                                                                                                                                                                                       |   |                                             |   |  |   |  |   |                                                |   |  |
| 5                                                                                                                                                                              | This ethical standard is very easy to implement                                                                                                                                                                                                                              |   |                                               |   |  |   |  |   |                                                     |   |  |                                                                                                                                                                                                                                                                              |   |                                                  |   |  |   |  |   |                                                  |   |  |                                                                                                                                                                                                                                                                            |   |                                                 |   |  |   |  |   |                                                 |   |  |                                                                                                                                                                                                                                                                                                  |   |                                                           |   |  |   |  |   |                                                             |   |  |                                                                                                                                                                                                                                                                       |   |                                             |   |  |   |  |   |                                                |   |  |
| 4                                                                                                                                                                              |                                                                                                                                                                                                                                                                              |   |                                               |   |  |   |  |   |                                                     |   |  |                                                                                                                                                                                                                                                                              |   |                                                  |   |  |   |  |   |                                                  |   |  |                                                                                                                                                                                                                                                                            |   |                                                 |   |  |   |  |   |                                                 |   |  |                                                                                                                                                                                                                                                                                                  |   |                                                           |   |  |   |  |   |                                                             |   |  |                                                                                                                                                                                                                                                                       |   |                                             |   |  |   |  |   |                                                |   |  |
| 3                                                                                                                                                                              |                                                                                                                                                                                                                                                                              |   |                                               |   |  |   |  |   |                                                     |   |  |                                                                                                                                                                                                                                                                              |   |                                                  |   |  |   |  |   |                                                  |   |  |                                                                                                                                                                                                                                                                            |   |                                                 |   |  |   |  |   |                                                 |   |  |                                                                                                                                                                                                                                                                                                  |   |                                                           |   |  |   |  |   |                                                             |   |  |                                                                                                                                                                                                                                                                       |   |                                             |   |  |   |  |   |                                                |   |  |
| 2                                                                                                                                                                              | This ethical standard is very hard to implement                                                                                                                                                                                                                              |   |                                               |   |  |   |  |   |                                                     |   |  |                                                                                                                                                                                                                                                                              |   |                                                  |   |  |   |  |   |                                                  |   |  |                                                                                                                                                                                                                                                                            |   |                                                 |   |  |   |  |   |                                                 |   |  |                                                                                                                                                                                                                                                                                                  |   |                                                           |   |  |   |  |   |                                                             |   |  |                                                                                                                                                                                                                                                                       |   |                                             |   |  |   |  |   |                                                |   |  |
| 1                                                                                                                                                                              |                                                                                                                                                                                                                                                                              |   |                                               |   |  |   |  |   |                                                     |   |  |                                                                                                                                                                                                                                                                              |   |                                                  |   |  |   |  |   |                                                  |   |  |                                                                                                                                                                                                                                                                            |   |                                                 |   |  |   |  |   |                                                 |   |  |                                                                                                                                                                                                                                                                                                  |   |                                                           |   |  |   |  |   |                                                             |   |  |                                                                                                                                                                                                                                                                       |   |                                             |   |  |   |  |   |                                                |   |  |
| 5                                                                                                                                                                              | This ethical standard greatly protects trial participants                                                                                                                                                                                                                    |   |                                               |   |  |   |  |   |                                                     |   |  |                                                                                                                                                                                                                                                                              |   |                                                  |   |  |   |  |   |                                                  |   |  |                                                                                                                                                                                                                                                                            |   |                                                 |   |  |   |  |   |                                                 |   |  |                                                                                                                                                                                                                                                                                                  |   |                                                           |   |  |   |  |   |                                                             |   |  |                                                                                                                                                                                                                                                                       |   |                                             |   |  |   |  |   |                                                |   |  |
| 4                                                                                                                                                                              |                                                                                                                                                                                                                                                                              |   |                                               |   |  |   |  |   |                                                     |   |  |                                                                                                                                                                                                                                                                              |   |                                                  |   |  |   |  |   |                                                  |   |  |                                                                                                                                                                                                                                                                            |   |                                                 |   |  |   |  |   |                                                 |   |  |                                                                                                                                                                                                                                                                                                  |   |                                                           |   |  |   |  |   |                                                             |   |  |                                                                                                                                                                                                                                                                       |   |                                             |   |  |   |  |   |                                                |   |  |
| 3                                                                                                                                                                              |                                                                                                                                                                                                                                                                              |   |                                               |   |  |   |  |   |                                                     |   |  |                                                                                                                                                                                                                                                                              |   |                                                  |   |  |   |  |   |                                                  |   |  |                                                                                                                                                                                                                                                                            |   |                                                 |   |  |   |  |   |                                                 |   |  |                                                                                                                                                                                                                                                                                                  |   |                                                           |   |  |   |  |   |                                                             |   |  |                                                                                                                                                                                                                                                                       |   |                                             |   |  |   |  |   |                                                |   |  |
| 2                                                                                                                                                                              | This ethical standard minimally protects trial participants                                                                                                                                                                                                                  |   |                                               |   |  |   |  |   |                                                     |   |  |                                                                                                                                                                                                                                                                              |   |                                                  |   |  |   |  |   |                                                  |   |  |                                                                                                                                                                                                                                                                            |   |                                                 |   |  |   |  |   |                                                 |   |  |                                                                                                                                                                                                                                                                                                  |   |                                                           |   |  |   |  |   |                                                             |   |  |                                                                                                                                                                                                                                                                       |   |                                             |   |  |   |  |   |                                                |   |  |
| 1                                                                                                                                                                              |                                                                                                                                                                                                                                                                              |   |                                               |   |  |   |  |   |                                                     |   |  |                                                                                                                                                                                                                                                                              |   |                                                  |   |  |   |  |   |                                                  |   |  |                                                                                                                                                                                                                                                                            |   |                                                 |   |  |   |  |   |                                                 |   |  |                                                                                                                                                                                                                                                                                                  |   |                                                           |   |  |   |  |   |                                                             |   |  |                                                                                                                                                                                                                                                                       |   |                                             |   |  |   |  |   |                                                |   |  |
| 5                                                                                                                                                                              | I strongly agree with this ethical standard                                                                                                                                                                                                                                  |   |                                               |   |  |   |  |   |                                                     |   |  |                                                                                                                                                                                                                                                                              |   |                                                  |   |  |   |  |   |                                                  |   |  |                                                                                                                                                                                                                                                                            |   |                                                 |   |  |   |  |   |                                                 |   |  |                                                                                                                                                                                                                                                                                                  |   |                                                           |   |  |   |  |   |                                                             |   |  |                                                                                                                                                                                                                                                                       |   |                                             |   |  |   |  |   |                                                |   |  |
| 4                                                                                                                                                                              |                                                                                                                                                                                                                                                                              |   |                                               |   |  |   |  |   |                                                     |   |  |                                                                                                                                                                                                                                                                              |   |                                                  |   |  |   |  |   |                                                  |   |  |                                                                                                                                                                                                                                                                            |   |                                                 |   |  |   |  |   |                                                 |   |  |                                                                                                                                                                                                                                                                                                  |   |                                                           |   |  |   |  |   |                                                             |   |  |                                                                                                                                                                                                                                                                       |   |                                             |   |  |   |  |   |                                                |   |  |
| 3                                                                                                                                                                              |                                                                                                                                                                                                                                                                              |   |                                               |   |  |   |  |   |                                                     |   |  |                                                                                                                                                                                                                                                                              |   |                                                  |   |  |   |  |   |                                                  |   |  |                                                                                                                                                                                                                                                                            |   |                                                 |   |  |   |  |   |                                                 |   |  |                                                                                                                                                                                                                                                                                                  |   |                                                           |   |  |   |  |   |                                                             |   |  |                                                                                                                                                                                                                                                                       |   |                                             |   |  |   |  |   |                                                |   |  |
| 2                                                                                                                                                                              | I strongly disagree with this ethical standard                                                                                                                                                                                                                               |   |                                               |   |  |   |  |   |                                                     |   |  |                                                                                                                                                                                                                                                                              |   |                                                  |   |  |   |  |   |                                                  |   |  |                                                                                                                                                                                                                                                                            |   |                                                 |   |  |   |  |   |                                                 |   |  |                                                                                                                                                                                                                                                                                                  |   |                                                           |   |  |   |  |   |                                                             |   |  |                                                                                                                                                                                                                                                                       |   |                                             |   |  |   |  |   |                                                |   |  |
| 1                                                                                                                                                                              |                                                                                                                                                                                                                                                                              |   |                                               |   |  |   |  |   |                                                     |   |  |                                                                                                                                                                                                                                                                              |   |                                                  |   |  |   |  |   |                                                  |   |  |                                                                                                                                                                                                                                                                            |   |                                                 |   |  |   |  |   |                                                 |   |  |                                                                                                                                                                                                                                                                                                  |   |                                                           |   |  |   |  |   |                                                             |   |  |                                                                                                                                                                                                                                                                       |   |                                             |   |  |   |  |   |                                                |   |  |
| 7. The provision of risk reduction interventions should be monitored.                                                                                                          | <table border="1"> <tr><td>5</td><td>I am very familiar with this ethical standard</td></tr> <tr><td>4</td><td></td></tr> <tr><td>3</td><td></td></tr> <tr><td>2</td><td>I am not at all familiar with this ethical standard</td></tr> <tr><td>1</td><td></td></tr> </table> | 5 | I am very familiar with this ethical standard | 4 |  | 3 |  | 2 | I am not at all familiar with this ethical standard | 1 |  | <table border="1"> <tr><td>5</td><td>This ethical standard is very easy to understand</td></tr> <tr><td>4</td><td></td></tr> <tr><td>3</td><td></td></tr> <tr><td>2</td><td>This ethical standard is very hard to understand</td></tr> <tr><td>1</td><td></td></tr> </table> | 5 | This ethical standard is very easy to understand | 4 |  | 3 |  | 2 | This ethical standard is very hard to understand | 1 |  | <table border="1"> <tr><td>5</td><td>This ethical standard is very easy to implement</td></tr> <tr><td>4</td><td></td></tr> <tr><td>3</td><td></td></tr> <tr><td>2</td><td>This ethical standard is very hard to implement</td></tr> <tr><td>1</td><td></td></tr> </table> | 5 | This ethical standard is very easy to implement | 4 |  | 3 |  | 2 | This ethical standard is very hard to implement | 1 |  | <table border="1"> <tr><td>5</td><td>This ethical standard greatly protects trial participants</td></tr> <tr><td>4</td><td></td></tr> <tr><td>3</td><td></td></tr> <tr><td>2</td><td>This ethical standard minimally protects trial participants</td></tr> <tr><td>1</td><td></td></tr> </table> | 5 | This ethical standard greatly protects trial participants | 4 |  | 3 |  | 2 | This ethical standard minimally protects trial participants | 1 |  | <table border="1"> <tr><td>5</td><td>I strongly agree with this ethical standard</td></tr> <tr><td>4</td><td></td></tr> <tr><td>3</td><td></td></tr> <tr><td>2</td><td>I strongly disagree with this ethical standard</td></tr> <tr><td>1</td><td></td></tr> </table> | 5 | I strongly agree with this ethical standard | 4 |  | 3 |  | 2 | I strongly disagree with this ethical standard | 1 |  |
| 5                                                                                                                                                                              | I am very familiar with this ethical standard                                                                                                                                                                                                                                |   |                                               |   |  |   |  |   |                                                     |   |  |                                                                                                                                                                                                                                                                              |   |                                                  |   |  |   |  |   |                                                  |   |  |                                                                                                                                                                                                                                                                            |   |                                                 |   |  |   |  |   |                                                 |   |  |                                                                                                                                                                                                                                                                                                  |   |                                                           |   |  |   |  |   |                                                             |   |  |                                                                                                                                                                                                                                                                       |   |                                             |   |  |   |  |   |                                                |   |  |
| 4                                                                                                                                                                              |                                                                                                                                                                                                                                                                              |   |                                               |   |  |   |  |   |                                                     |   |  |                                                                                                                                                                                                                                                                              |   |                                                  |   |  |   |  |   |                                                  |   |  |                                                                                                                                                                                                                                                                            |   |                                                 |   |  |   |  |   |                                                 |   |  |                                                                                                                                                                                                                                                                                                  |   |                                                           |   |  |   |  |   |                                                             |   |  |                                                                                                                                                                                                                                                                       |   |                                             |   |  |   |  |   |                                                |   |  |
| 3                                                                                                                                                                              |                                                                                                                                                                                                                                                                              |   |                                               |   |  |   |  |   |                                                     |   |  |                                                                                                                                                                                                                                                                              |   |                                                  |   |  |   |  |   |                                                  |   |  |                                                                                                                                                                                                                                                                            |   |                                                 |   |  |   |  |   |                                                 |   |  |                                                                                                                                                                                                                                                                                                  |   |                                                           |   |  |   |  |   |                                                             |   |  |                                                                                                                                                                                                                                                                       |   |                                             |   |  |   |  |   |                                                |   |  |
| 2                                                                                                                                                                              | I am not at all familiar with this ethical standard                                                                                                                                                                                                                          |   |                                               |   |  |   |  |   |                                                     |   |  |                                                                                                                                                                                                                                                                              |   |                                                  |   |  |   |  |   |                                                  |   |  |                                                                                                                                                                                                                                                                            |   |                                                 |   |  |   |  |   |                                                 |   |  |                                                                                                                                                                                                                                                                                                  |   |                                                           |   |  |   |  |   |                                                             |   |  |                                                                                                                                                                                                                                                                       |   |                                             |   |  |   |  |   |                                                |   |  |
| 1                                                                                                                                                                              |                                                                                                                                                                                                                                                                              |   |                                               |   |  |   |  |   |                                                     |   |  |                                                                                                                                                                                                                                                                              |   |                                                  |   |  |   |  |   |                                                  |   |  |                                                                                                                                                                                                                                                                            |   |                                                 |   |  |   |  |   |                                                 |   |  |                                                                                                                                                                                                                                                                                                  |   |                                                           |   |  |   |  |   |                                                             |   |  |                                                                                                                                                                                                                                                                       |   |                                             |   |  |   |  |   |                                                |   |  |
| 5                                                                                                                                                                              | This ethical standard is very easy to understand                                                                                                                                                                                                                             |   |                                               |   |  |   |  |   |                                                     |   |  |                                                                                                                                                                                                                                                                              |   |                                                  |   |  |   |  |   |                                                  |   |  |                                                                                                                                                                                                                                                                            |   |                                                 |   |  |   |  |   |                                                 |   |  |                                                                                                                                                                                                                                                                                                  |   |                                                           |   |  |   |  |   |                                                             |   |  |                                                                                                                                                                                                                                                                       |   |                                             |   |  |   |  |   |                                                |   |  |
| 4                                                                                                                                                                              |                                                                                                                                                                                                                                                                              |   |                                               |   |  |   |  |   |                                                     |   |  |                                                                                                                                                                                                                                                                              |   |                                                  |   |  |   |  |   |                                                  |   |  |                                                                                                                                                                                                                                                                            |   |                                                 |   |  |   |  |   |                                                 |   |  |                                                                                                                                                                                                                                                                                                  |   |                                                           |   |  |   |  |   |                                                             |   |  |                                                                                                                                                                                                                                                                       |   |                                             |   |  |   |  |   |                                                |   |  |
| 3                                                                                                                                                                              |                                                                                                                                                                                                                                                                              |   |                                               |   |  |   |  |   |                                                     |   |  |                                                                                                                                                                                                                                                                              |   |                                                  |   |  |   |  |   |                                                  |   |  |                                                                                                                                                                                                                                                                            |   |                                                 |   |  |   |  |   |                                                 |   |  |                                                                                                                                                                                                                                                                                                  |   |                                                           |   |  |   |  |   |                                                             |   |  |                                                                                                                                                                                                                                                                       |   |                                             |   |  |   |  |   |                                                |   |  |
| 2                                                                                                                                                                              | This ethical standard is very hard to understand                                                                                                                                                                                                                             |   |                                               |   |  |   |  |   |                                                     |   |  |                                                                                                                                                                                                                                                                              |   |                                                  |   |  |   |  |   |                                                  |   |  |                                                                                                                                                                                                                                                                            |   |                                                 |   |  |   |  |   |                                                 |   |  |                                                                                                                                                                                                                                                                                                  |   |                                                           |   |  |   |  |   |                                                             |   |  |                                                                                                                                                                                                                                                                       |   |                                             |   |  |   |  |   |                                                |   |  |
| 1                                                                                                                                                                              |                                                                                                                                                                                                                                                                              |   |                                               |   |  |   |  |   |                                                     |   |  |                                                                                                                                                                                                                                                                              |   |                                                  |   |  |   |  |   |                                                  |   |  |                                                                                                                                                                                                                                                                            |   |                                                 |   |  |   |  |   |                                                 |   |  |                                                                                                                                                                                                                                                                                                  |   |                                                           |   |  |   |  |   |                                                             |   |  |                                                                                                                                                                                                                                                                       |   |                                             |   |  |   |  |   |                                                |   |  |
| 5                                                                                                                                                                              | This ethical standard is very easy to implement                                                                                                                                                                                                                              |   |                                               |   |  |   |  |   |                                                     |   |  |                                                                                                                                                                                                                                                                              |   |                                                  |   |  |   |  |   |                                                  |   |  |                                                                                                                                                                                                                                                                            |   |                                                 |   |  |   |  |   |                                                 |   |  |                                                                                                                                                                                                                                                                                                  |   |                                                           |   |  |   |  |   |                                                             |   |  |                                                                                                                                                                                                                                                                       |   |                                             |   |  |   |  |   |                                                |   |  |
| 4                                                                                                                                                                              |                                                                                                                                                                                                                                                                              |   |                                               |   |  |   |  |   |                                                     |   |  |                                                                                                                                                                                                                                                                              |   |                                                  |   |  |   |  |   |                                                  |   |  |                                                                                                                                                                                                                                                                            |   |                                                 |   |  |   |  |   |                                                 |   |  |                                                                                                                                                                                                                                                                                                  |   |                                                           |   |  |   |  |   |                                                             |   |  |                                                                                                                                                                                                                                                                       |   |                                             |   |  |   |  |   |                                                |   |  |
| 3                                                                                                                                                                              |                                                                                                                                                                                                                                                                              |   |                                               |   |  |   |  |   |                                                     |   |  |                                                                                                                                                                                                                                                                              |   |                                                  |   |  |   |  |   |                                                  |   |  |                                                                                                                                                                                                                                                                            |   |                                                 |   |  |   |  |   |                                                 |   |  |                                                                                                                                                                                                                                                                                                  |   |                                                           |   |  |   |  |   |                                                             |   |  |                                                                                                                                                                                                                                                                       |   |                                             |   |  |   |  |   |                                                |   |  |
| 2                                                                                                                                                                              | This ethical standard is very hard to implement                                                                                                                                                                                                                              |   |                                               |   |  |   |  |   |                                                     |   |  |                                                                                                                                                                                                                                                                              |   |                                                  |   |  |   |  |   |                                                  |   |  |                                                                                                                                                                                                                                                                            |   |                                                 |   |  |   |  |   |                                                 |   |  |                                                                                                                                                                                                                                                                                                  |   |                                                           |   |  |   |  |   |                                                             |   |  |                                                                                                                                                                                                                                                                       |   |                                             |   |  |   |  |   |                                                |   |  |
| 1                                                                                                                                                                              |                                                                                                                                                                                                                                                                              |   |                                               |   |  |   |  |   |                                                     |   |  |                                                                                                                                                                                                                                                                              |   |                                                  |   |  |   |  |   |                                                  |   |  |                                                                                                                                                                                                                                                                            |   |                                                 |   |  |   |  |   |                                                 |   |  |                                                                                                                                                                                                                                                                                                  |   |                                                           |   |  |   |  |   |                                                             |   |  |                                                                                                                                                                                                                                                                       |   |                                             |   |  |   |  |   |                                                |   |  |
| 5                                                                                                                                                                              | This ethical standard greatly protects trial participants                                                                                                                                                                                                                    |   |                                               |   |  |   |  |   |                                                     |   |  |                                                                                                                                                                                                                                                                              |   |                                                  |   |  |   |  |   |                                                  |   |  |                                                                                                                                                                                                                                                                            |   |                                                 |   |  |   |  |   |                                                 |   |  |                                                                                                                                                                                                                                                                                                  |   |                                                           |   |  |   |  |   |                                                             |   |  |                                                                                                                                                                                                                                                                       |   |                                             |   |  |   |  |   |                                                |   |  |
| 4                                                                                                                                                                              |                                                                                                                                                                                                                                                                              |   |                                               |   |  |   |  |   |                                                     |   |  |                                                                                                                                                                                                                                                                              |   |                                                  |   |  |   |  |   |                                                  |   |  |                                                                                                                                                                                                                                                                            |   |                                                 |   |  |   |  |   |                                                 |   |  |                                                                                                                                                                                                                                                                                                  |   |                                                           |   |  |   |  |   |                                                             |   |  |                                                                                                                                                                                                                                                                       |   |                                             |   |  |   |  |   |                                                |   |  |
| 3                                                                                                                                                                              |                                                                                                                                                                                                                                                                              |   |                                               |   |  |   |  |   |                                                     |   |  |                                                                                                                                                                                                                                                                              |   |                                                  |   |  |   |  |   |                                                  |   |  |                                                                                                                                                                                                                                                                            |   |                                                 |   |  |   |  |   |                                                 |   |  |                                                                                                                                                                                                                                                                                                  |   |                                                           |   |  |   |  |   |                                                             |   |  |                                                                                                                                                                                                                                                                       |   |                                             |   |  |   |  |   |                                                |   |  |
| 2                                                                                                                                                                              | This ethical standard minimally protects trial participants                                                                                                                                                                                                                  |   |                                               |   |  |   |  |   |                                                     |   |  |                                                                                                                                                                                                                                                                              |   |                                                  |   |  |   |  |   |                                                  |   |  |                                                                                                                                                                                                                                                                            |   |                                                 |   |  |   |  |   |                                                 |   |  |                                                                                                                                                                                                                                                                                                  |   |                                                           |   |  |   |  |   |                                                             |   |  |                                                                                                                                                                                                                                                                       |   |                                             |   |  |   |  |   |                                                |   |  |
| 1                                                                                                                                                                              |                                                                                                                                                                                                                                                                              |   |                                               |   |  |   |  |   |                                                     |   |  |                                                                                                                                                                                                                                                                              |   |                                                  |   |  |   |  |   |                                                  |   |  |                                                                                                                                                                                                                                                                            |   |                                                 |   |  |   |  |   |                                                 |   |  |                                                                                                                                                                                                                                                                                                  |   |                                                           |   |  |   |  |   |                                                             |   |  |                                                                                                                                                                                                                                                                       |   |                                             |   |  |   |  |   |                                                |   |  |
| 5                                                                                                                                                                              | I strongly agree with this ethical standard                                                                                                                                                                                                                                  |   |                                               |   |  |   |  |   |                                                     |   |  |                                                                                                                                                                                                                                                                              |   |                                                  |   |  |   |  |   |                                                  |   |  |                                                                                                                                                                                                                                                                            |   |                                                 |   |  |   |  |   |                                                 |   |  |                                                                                                                                                                                                                                                                                                  |   |                                                           |   |  |   |  |   |                                                             |   |  |                                                                                                                                                                                                                                                                       |   |                                             |   |  |   |  |   |                                                |   |  |
| 4                                                                                                                                                                              |                                                                                                                                                                                                                                                                              |   |                                               |   |  |   |  |   |                                                     |   |  |                                                                                                                                                                                                                                                                              |   |                                                  |   |  |   |  |   |                                                  |   |  |                                                                                                                                                                                                                                                                            |   |                                                 |   |  |   |  |   |                                                 |   |  |                                                                                                                                                                                                                                                                                                  |   |                                                           |   |  |   |  |   |                                                             |   |  |                                                                                                                                                                                                                                                                       |   |                                             |   |  |   |  |   |                                                |   |  |
| 3                                                                                                                                                                              |                                                                                                                                                                                                                                                                              |   |                                               |   |  |   |  |   |                                                     |   |  |                                                                                                                                                                                                                                                                              |   |                                                  |   |  |   |  |   |                                                  |   |  |                                                                                                                                                                                                                                                                            |   |                                                 |   |  |   |  |   |                                                 |   |  |                                                                                                                                                                                                                                                                                                  |   |                                                           |   |  |   |  |   |                                                             |   |  |                                                                                                                                                                                                                                                                       |   |                                             |   |  |   |  |   |                                                |   |  |
| 2                                                                                                                                                                              | I strongly disagree with this ethical standard                                                                                                                                                                                                                               |   |                                               |   |  |   |  |   |                                                     |   |  |                                                                                                                                                                                                                                                                              |   |                                                  |   |  |   |  |   |                                                  |   |  |                                                                                                                                                                                                                                                                            |   |                                                 |   |  |   |  |   |                                                 |   |  |                                                                                                                                                                                                                                                                                                  |   |                                                           |   |  |   |  |   |                                                             |   |  |                                                                                                                                                                                                                                                                       |   |                                             |   |  |   |  |   |                                                |   |  |
| 1                                                                                                                                                                              |                                                                                                                                                                                                                                                                              |   |                                               |   |  |   |  |   |                                                     |   |  |                                                                                                                                                                                                                                                                              |   |                                                  |   |  |   |  |   |                                                  |   |  |                                                                                                                                                                                                                                                                            |   |                                                 |   |  |   |  |   |                                                 |   |  |                                                                                                                                                                                                                                                                                                  |   |                                                           |   |  |   |  |   |                                                             |   |  |                                                                                                                                                                                                                                                                       |   |                                             |   |  |   |  |   |                                                |   |  |

|                                                                                                                                                                            |                                                                                                                                                                                                                                                                              |   |                                               |   |  |   |  |   |                                                     |   |  |                                                                                                                                                                                                                                                                              |   |                                                  |   |  |   |  |   |                                                  |   |  |                                                                                                                                                                                                                                                                            |   |                                                 |   |  |   |  |   |                                                 |   |  |                                                                                                                                                                                                                                                                                                  |   |                                                           |   |  |   |  |   |                                                             |   |  |                                                                                                                                                                                                                                                                       |   |                                             |   |  |   |  |   |                                                |   |  |
|----------------------------------------------------------------------------------------------------------------------------------------------------------------------------|------------------------------------------------------------------------------------------------------------------------------------------------------------------------------------------------------------------------------------------------------------------------------|---|-----------------------------------------------|---|--|---|--|---|-----------------------------------------------------|---|--|------------------------------------------------------------------------------------------------------------------------------------------------------------------------------------------------------------------------------------------------------------------------------|---|--------------------------------------------------|---|--|---|--|---|--------------------------------------------------|---|--|----------------------------------------------------------------------------------------------------------------------------------------------------------------------------------------------------------------------------------------------------------------------------|---|-------------------------------------------------|---|--|---|--|---|-------------------------------------------------|---|--|--------------------------------------------------------------------------------------------------------------------------------------------------------------------------------------------------------------------------------------------------------------------------------------------------|---|-----------------------------------------------------------|---|--|---|--|---|-------------------------------------------------------------|---|--|-----------------------------------------------------------------------------------------------------------------------------------------------------------------------------------------------------------------------------------------------------------------------|---|---------------------------------------------|---|--|---|--|---|------------------------------------------------|---|--|
| 8. Stakeholders should discuss disseminating results about how the standard of prevention was implemented in the trial.                                                    | <table border="1"> <tr><td>5</td><td>I am very familiar with this ethical standard</td></tr> <tr><td>4</td><td></td></tr> <tr><td>3</td><td></td></tr> <tr><td>2</td><td>I am not at all familiar with this ethical standard</td></tr> <tr><td>1</td><td></td></tr> </table> | 5 | I am very familiar with this ethical standard | 4 |  | 3 |  | 2 | I am not at all familiar with this ethical standard | 1 |  | <table border="1"> <tr><td>5</td><td>This ethical standard is very easy to understand</td></tr> <tr><td>4</td><td></td></tr> <tr><td>3</td><td></td></tr> <tr><td>2</td><td>This ethical standard is very hard to understand</td></tr> <tr><td>1</td><td></td></tr> </table> | 5 | This ethical standard is very easy to understand | 4 |  | 3 |  | 2 | This ethical standard is very hard to understand | 1 |  | <table border="1"> <tr><td>5</td><td>This ethical standard is very easy to implement</td></tr> <tr><td>4</td><td></td></tr> <tr><td>3</td><td></td></tr> <tr><td>2</td><td>This ethical standard is very hard to implement</td></tr> <tr><td>1</td><td></td></tr> </table> | 5 | This ethical standard is very easy to implement | 4 |  | 3 |  | 2 | This ethical standard is very hard to implement | 1 |  | <table border="1"> <tr><td>5</td><td>This ethical standard greatly protects trial participants</td></tr> <tr><td>4</td><td></td></tr> <tr><td>3</td><td></td></tr> <tr><td>2</td><td>This ethical standard minimally protects trial participants</td></tr> <tr><td>1</td><td></td></tr> </table> | 5 | This ethical standard greatly protects trial participants | 4 |  | 3 |  | 2 | This ethical standard minimally protects trial participants | 1 |  | <table border="1"> <tr><td>5</td><td>I strongly agree with this ethical standard</td></tr> <tr><td>4</td><td></td></tr> <tr><td>3</td><td></td></tr> <tr><td>2</td><td>I strongly disagree with this ethical standard</td></tr> <tr><td>1</td><td></td></tr> </table> | 5 | I strongly agree with this ethical standard | 4 |  | 3 |  | 2 | I strongly disagree with this ethical standard | 1 |  |
| 5                                                                                                                                                                          | I am very familiar with this ethical standard                                                                                                                                                                                                                                |   |                                               |   |  |   |  |   |                                                     |   |  |                                                                                                                                                                                                                                                                              |   |                                                  |   |  |   |  |   |                                                  |   |  |                                                                                                                                                                                                                                                                            |   |                                                 |   |  |   |  |   |                                                 |   |  |                                                                                                                                                                                                                                                                                                  |   |                                                           |   |  |   |  |   |                                                             |   |  |                                                                                                                                                                                                                                                                       |   |                                             |   |  |   |  |   |                                                |   |  |
| 4                                                                                                                                                                          |                                                                                                                                                                                                                                                                              |   |                                               |   |  |   |  |   |                                                     |   |  |                                                                                                                                                                                                                                                                              |   |                                                  |   |  |   |  |   |                                                  |   |  |                                                                                                                                                                                                                                                                            |   |                                                 |   |  |   |  |   |                                                 |   |  |                                                                                                                                                                                                                                                                                                  |   |                                                           |   |  |   |  |   |                                                             |   |  |                                                                                                                                                                                                                                                                       |   |                                             |   |  |   |  |   |                                                |   |  |
| 3                                                                                                                                                                          |                                                                                                                                                                                                                                                                              |   |                                               |   |  |   |  |   |                                                     |   |  |                                                                                                                                                                                                                                                                              |   |                                                  |   |  |   |  |   |                                                  |   |  |                                                                                                                                                                                                                                                                            |   |                                                 |   |  |   |  |   |                                                 |   |  |                                                                                                                                                                                                                                                                                                  |   |                                                           |   |  |   |  |   |                                                             |   |  |                                                                                                                                                                                                                                                                       |   |                                             |   |  |   |  |   |                                                |   |  |
| 2                                                                                                                                                                          | I am not at all familiar with this ethical standard                                                                                                                                                                                                                          |   |                                               |   |  |   |  |   |                                                     |   |  |                                                                                                                                                                                                                                                                              |   |                                                  |   |  |   |  |   |                                                  |   |  |                                                                                                                                                                                                                                                                            |   |                                                 |   |  |   |  |   |                                                 |   |  |                                                                                                                                                                                                                                                                                                  |   |                                                           |   |  |   |  |   |                                                             |   |  |                                                                                                                                                                                                                                                                       |   |                                             |   |  |   |  |   |                                                |   |  |
| 1                                                                                                                                                                          |                                                                                                                                                                                                                                                                              |   |                                               |   |  |   |  |   |                                                     |   |  |                                                                                                                                                                                                                                                                              |   |                                                  |   |  |   |  |   |                                                  |   |  |                                                                                                                                                                                                                                                                            |   |                                                 |   |  |   |  |   |                                                 |   |  |                                                                                                                                                                                                                                                                                                  |   |                                                           |   |  |   |  |   |                                                             |   |  |                                                                                                                                                                                                                                                                       |   |                                             |   |  |   |  |   |                                                |   |  |
| 5                                                                                                                                                                          | This ethical standard is very easy to understand                                                                                                                                                                                                                             |   |                                               |   |  |   |  |   |                                                     |   |  |                                                                                                                                                                                                                                                                              |   |                                                  |   |  |   |  |   |                                                  |   |  |                                                                                                                                                                                                                                                                            |   |                                                 |   |  |   |  |   |                                                 |   |  |                                                                                                                                                                                                                                                                                                  |   |                                                           |   |  |   |  |   |                                                             |   |  |                                                                                                                                                                                                                                                                       |   |                                             |   |  |   |  |   |                                                |   |  |
| 4                                                                                                                                                                          |                                                                                                                                                                                                                                                                              |   |                                               |   |  |   |  |   |                                                     |   |  |                                                                                                                                                                                                                                                                              |   |                                                  |   |  |   |  |   |                                                  |   |  |                                                                                                                                                                                                                                                                            |   |                                                 |   |  |   |  |   |                                                 |   |  |                                                                                                                                                                                                                                                                                                  |   |                                                           |   |  |   |  |   |                                                             |   |  |                                                                                                                                                                                                                                                                       |   |                                             |   |  |   |  |   |                                                |   |  |
| 3                                                                                                                                                                          |                                                                                                                                                                                                                                                                              |   |                                               |   |  |   |  |   |                                                     |   |  |                                                                                                                                                                                                                                                                              |   |                                                  |   |  |   |  |   |                                                  |   |  |                                                                                                                                                                                                                                                                            |   |                                                 |   |  |   |  |   |                                                 |   |  |                                                                                                                                                                                                                                                                                                  |   |                                                           |   |  |   |  |   |                                                             |   |  |                                                                                                                                                                                                                                                                       |   |                                             |   |  |   |  |   |                                                |   |  |
| 2                                                                                                                                                                          | This ethical standard is very hard to understand                                                                                                                                                                                                                             |   |                                               |   |  |   |  |   |                                                     |   |  |                                                                                                                                                                                                                                                                              |   |                                                  |   |  |   |  |   |                                                  |   |  |                                                                                                                                                                                                                                                                            |   |                                                 |   |  |   |  |   |                                                 |   |  |                                                                                                                                                                                                                                                                                                  |   |                                                           |   |  |   |  |   |                                                             |   |  |                                                                                                                                                                                                                                                                       |   |                                             |   |  |   |  |   |                                                |   |  |
| 1                                                                                                                                                                          |                                                                                                                                                                                                                                                                              |   |                                               |   |  |   |  |   |                                                     |   |  |                                                                                                                                                                                                                                                                              |   |                                                  |   |  |   |  |   |                                                  |   |  |                                                                                                                                                                                                                                                                            |   |                                                 |   |  |   |  |   |                                                 |   |  |                                                                                                                                                                                                                                                                                                  |   |                                                           |   |  |   |  |   |                                                             |   |  |                                                                                                                                                                                                                                                                       |   |                                             |   |  |   |  |   |                                                |   |  |
| 5                                                                                                                                                                          | This ethical standard is very easy to implement                                                                                                                                                                                                                              |   |                                               |   |  |   |  |   |                                                     |   |  |                                                                                                                                                                                                                                                                              |   |                                                  |   |  |   |  |   |                                                  |   |  |                                                                                                                                                                                                                                                                            |   |                                                 |   |  |   |  |   |                                                 |   |  |                                                                                                                                                                                                                                                                                                  |   |                                                           |   |  |   |  |   |                                                             |   |  |                                                                                                                                                                                                                                                                       |   |                                             |   |  |   |  |   |                                                |   |  |
| 4                                                                                                                                                                          |                                                                                                                                                                                                                                                                              |   |                                               |   |  |   |  |   |                                                     |   |  |                                                                                                                                                                                                                                                                              |   |                                                  |   |  |   |  |   |                                                  |   |  |                                                                                                                                                                                                                                                                            |   |                                                 |   |  |   |  |   |                                                 |   |  |                                                                                                                                                                                                                                                                                                  |   |                                                           |   |  |   |  |   |                                                             |   |  |                                                                                                                                                                                                                                                                       |   |                                             |   |  |   |  |   |                                                |   |  |
| 3                                                                                                                                                                          |                                                                                                                                                                                                                                                                              |   |                                               |   |  |   |  |   |                                                     |   |  |                                                                                                                                                                                                                                                                              |   |                                                  |   |  |   |  |   |                                                  |   |  |                                                                                                                                                                                                                                                                            |   |                                                 |   |  |   |  |   |                                                 |   |  |                                                                                                                                                                                                                                                                                                  |   |                                                           |   |  |   |  |   |                                                             |   |  |                                                                                                                                                                                                                                                                       |   |                                             |   |  |   |  |   |                                                |   |  |
| 2                                                                                                                                                                          | This ethical standard is very hard to implement                                                                                                                                                                                                                              |   |                                               |   |  |   |  |   |                                                     |   |  |                                                                                                                                                                                                                                                                              |   |                                                  |   |  |   |  |   |                                                  |   |  |                                                                                                                                                                                                                                                                            |   |                                                 |   |  |   |  |   |                                                 |   |  |                                                                                                                                                                                                                                                                                                  |   |                                                           |   |  |   |  |   |                                                             |   |  |                                                                                                                                                                                                                                                                       |   |                                             |   |  |   |  |   |                                                |   |  |
| 1                                                                                                                                                                          |                                                                                                                                                                                                                                                                              |   |                                               |   |  |   |  |   |                                                     |   |  |                                                                                                                                                                                                                                                                              |   |                                                  |   |  |   |  |   |                                                  |   |  |                                                                                                                                                                                                                                                                            |   |                                                 |   |  |   |  |   |                                                 |   |  |                                                                                                                                                                                                                                                                                                  |   |                                                           |   |  |   |  |   |                                                             |   |  |                                                                                                                                                                                                                                                                       |   |                                             |   |  |   |  |   |                                                |   |  |
| 5                                                                                                                                                                          | This ethical standard greatly protects trial participants                                                                                                                                                                                                                    |   |                                               |   |  |   |  |   |                                                     |   |  |                                                                                                                                                                                                                                                                              |   |                                                  |   |  |   |  |   |                                                  |   |  |                                                                                                                                                                                                                                                                            |   |                                                 |   |  |   |  |   |                                                 |   |  |                                                                                                                                                                                                                                                                                                  |   |                                                           |   |  |   |  |   |                                                             |   |  |                                                                                                                                                                                                                                                                       |   |                                             |   |  |   |  |   |                                                |   |  |
| 4                                                                                                                                                                          |                                                                                                                                                                                                                                                                              |   |                                               |   |  |   |  |   |                                                     |   |  |                                                                                                                                                                                                                                                                              |   |                                                  |   |  |   |  |   |                                                  |   |  |                                                                                                                                                                                                                                                                            |   |                                                 |   |  |   |  |   |                                                 |   |  |                                                                                                                                                                                                                                                                                                  |   |                                                           |   |  |   |  |   |                                                             |   |  |                                                                                                                                                                                                                                                                       |   |                                             |   |  |   |  |   |                                                |   |  |
| 3                                                                                                                                                                          |                                                                                                                                                                                                                                                                              |   |                                               |   |  |   |  |   |                                                     |   |  |                                                                                                                                                                                                                                                                              |   |                                                  |   |  |   |  |   |                                                  |   |  |                                                                                                                                                                                                                                                                            |   |                                                 |   |  |   |  |   |                                                 |   |  |                                                                                                                                                                                                                                                                                                  |   |                                                           |   |  |   |  |   |                                                             |   |  |                                                                                                                                                                                                                                                                       |   |                                             |   |  |   |  |   |                                                |   |  |
| 2                                                                                                                                                                          | This ethical standard minimally protects trial participants                                                                                                                                                                                                                  |   |                                               |   |  |   |  |   |                                                     |   |  |                                                                                                                                                                                                                                                                              |   |                                                  |   |  |   |  |   |                                                  |   |  |                                                                                                                                                                                                                                                                            |   |                                                 |   |  |   |  |   |                                                 |   |  |                                                                                                                                                                                                                                                                                                  |   |                                                           |   |  |   |  |   |                                                             |   |  |                                                                                                                                                                                                                                                                       |   |                                             |   |  |   |  |   |                                                |   |  |
| 1                                                                                                                                                                          |                                                                                                                                                                                                                                                                              |   |                                               |   |  |   |  |   |                                                     |   |  |                                                                                                                                                                                                                                                                              |   |                                                  |   |  |   |  |   |                                                  |   |  |                                                                                                                                                                                                                                                                            |   |                                                 |   |  |   |  |   |                                                 |   |  |                                                                                                                                                                                                                                                                                                  |   |                                                           |   |  |   |  |   |                                                             |   |  |                                                                                                                                                                                                                                                                       |   |                                             |   |  |   |  |   |                                                |   |  |
| 5                                                                                                                                                                          | I strongly agree with this ethical standard                                                                                                                                                                                                                                  |   |                                               |   |  |   |  |   |                                                     |   |  |                                                                                                                                                                                                                                                                              |   |                                                  |   |  |   |  |   |                                                  |   |  |                                                                                                                                                                                                                                                                            |   |                                                 |   |  |   |  |   |                                                 |   |  |                                                                                                                                                                                                                                                                                                  |   |                                                           |   |  |   |  |   |                                                             |   |  |                                                                                                                                                                                                                                                                       |   |                                             |   |  |   |  |   |                                                |   |  |
| 4                                                                                                                                                                          |                                                                                                                                                                                                                                                                              |   |                                               |   |  |   |  |   |                                                     |   |  |                                                                                                                                                                                                                                                                              |   |                                                  |   |  |   |  |   |                                                  |   |  |                                                                                                                                                                                                                                                                            |   |                                                 |   |  |   |  |   |                                                 |   |  |                                                                                                                                                                                                                                                                                                  |   |                                                           |   |  |   |  |   |                                                             |   |  |                                                                                                                                                                                                                                                                       |   |                                             |   |  |   |  |   |                                                |   |  |
| 3                                                                                                                                                                          |                                                                                                                                                                                                                                                                              |   |                                               |   |  |   |  |   |                                                     |   |  |                                                                                                                                                                                                                                                                              |   |                                                  |   |  |   |  |   |                                                  |   |  |                                                                                                                                                                                                                                                                            |   |                                                 |   |  |   |  |   |                                                 |   |  |                                                                                                                                                                                                                                                                                                  |   |                                                           |   |  |   |  |   |                                                             |   |  |                                                                                                                                                                                                                                                                       |   |                                             |   |  |   |  |   |                                                |   |  |
| 2                                                                                                                                                                          | I strongly disagree with this ethical standard                                                                                                                                                                                                                               |   |                                               |   |  |   |  |   |                                                     |   |  |                                                                                                                                                                                                                                                                              |   |                                                  |   |  |   |  |   |                                                  |   |  |                                                                                                                                                                                                                                                                            |   |                                                 |   |  |   |  |   |                                                 |   |  |                                                                                                                                                                                                                                                                                                  |   |                                                           |   |  |   |  |   |                                                             |   |  |                                                                                                                                                                                                                                                                       |   |                                             |   |  |   |  |   |                                                |   |  |
| 1                                                                                                                                                                          |                                                                                                                                                                                                                                                                              |   |                                               |   |  |   |  |   |                                                     |   |  |                                                                                                                                                                                                                                                                              |   |                                                  |   |  |   |  |   |                                                  |   |  |                                                                                                                                                                                                                                                                            |   |                                                 |   |  |   |  |   |                                                 |   |  |                                                                                                                                                                                                                                                                                                  |   |                                                           |   |  |   |  |   |                                                             |   |  |                                                                                                                                                                                                                                                                       |   |                                             |   |  |   |  |   |                                                |   |  |
| 9. Researchers and trial sponsors should collaborate with government to strengthen capacity to deliver HIV prevention services.                                            | <table border="1"> <tr><td>5</td><td>I am very familiar with this ethical standard</td></tr> <tr><td>4</td><td></td></tr> <tr><td>3</td><td></td></tr> <tr><td>2</td><td>I am not at all familiar with this ethical standard</td></tr> <tr><td>1</td><td></td></tr> </table> | 5 | I am very familiar with this ethical standard | 4 |  | 3 |  | 2 | I am not at all familiar with this ethical standard | 1 |  | <table border="1"> <tr><td>5</td><td>This ethical standard is very easy to understand</td></tr> <tr><td>4</td><td></td></tr> <tr><td>3</td><td></td></tr> <tr><td>2</td><td>This ethical standard is very hard to understand</td></tr> <tr><td>1</td><td></td></tr> </table> | 5 | This ethical standard is very easy to understand | 4 |  | 3 |  | 2 | This ethical standard is very hard to understand | 1 |  | <table border="1"> <tr><td>5</td><td>This ethical standard is very easy to implement</td></tr> <tr><td>4</td><td></td></tr> <tr><td>3</td><td></td></tr> <tr><td>2</td><td>This ethical standard is very hard to implement</td></tr> <tr><td>1</td><td></td></tr> </table> | 5 | This ethical standard is very easy to implement | 4 |  | 3 |  | 2 | This ethical standard is very hard to implement | 1 |  | <table border="1"> <tr><td>5</td><td>This ethical standard greatly protects trial participants</td></tr> <tr><td>4</td><td></td></tr> <tr><td>3</td><td></td></tr> <tr><td>2</td><td>This ethical standard minimally protects trial participants</td></tr> <tr><td>1</td><td></td></tr> </table> | 5 | This ethical standard greatly protects trial participants | 4 |  | 3 |  | 2 | This ethical standard minimally protects trial participants | 1 |  | <table border="1"> <tr><td>5</td><td>I strongly agree with this ethical standard</td></tr> <tr><td>4</td><td></td></tr> <tr><td>3</td><td></td></tr> <tr><td>2</td><td>I strongly disagree with this ethical standard</td></tr> <tr><td>1</td><td></td></tr> </table> | 5 | I strongly agree with this ethical standard | 4 |  | 3 |  | 2 | I strongly disagree with this ethical standard | 1 |  |
| 5                                                                                                                                                                          | I am very familiar with this ethical standard                                                                                                                                                                                                                                |   |                                               |   |  |   |  |   |                                                     |   |  |                                                                                                                                                                                                                                                                              |   |                                                  |   |  |   |  |   |                                                  |   |  |                                                                                                                                                                                                                                                                            |   |                                                 |   |  |   |  |   |                                                 |   |  |                                                                                                                                                                                                                                                                                                  |   |                                                           |   |  |   |  |   |                                                             |   |  |                                                                                                                                                                                                                                                                       |   |                                             |   |  |   |  |   |                                                |   |  |
| 4                                                                                                                                                                          |                                                                                                                                                                                                                                                                              |   |                                               |   |  |   |  |   |                                                     |   |  |                                                                                                                                                                                                                                                                              |   |                                                  |   |  |   |  |   |                                                  |   |  |                                                                                                                                                                                                                                                                            |   |                                                 |   |  |   |  |   |                                                 |   |  |                                                                                                                                                                                                                                                                                                  |   |                                                           |   |  |   |  |   |                                                             |   |  |                                                                                                                                                                                                                                                                       |   |                                             |   |  |   |  |   |                                                |   |  |
| 3                                                                                                                                                                          |                                                                                                                                                                                                                                                                              |   |                                               |   |  |   |  |   |                                                     |   |  |                                                                                                                                                                                                                                                                              |   |                                                  |   |  |   |  |   |                                                  |   |  |                                                                                                                                                                                                                                                                            |   |                                                 |   |  |   |  |   |                                                 |   |  |                                                                                                                                                                                                                                                                                                  |   |                                                           |   |  |   |  |   |                                                             |   |  |                                                                                                                                                                                                                                                                       |   |                                             |   |  |   |  |   |                                                |   |  |
| 2                                                                                                                                                                          | I am not at all familiar with this ethical standard                                                                                                                                                                                                                          |   |                                               |   |  |   |  |   |                                                     |   |  |                                                                                                                                                                                                                                                                              |   |                                                  |   |  |   |  |   |                                                  |   |  |                                                                                                                                                                                                                                                                            |   |                                                 |   |  |   |  |   |                                                 |   |  |                                                                                                                                                                                                                                                                                                  |   |                                                           |   |  |   |  |   |                                                             |   |  |                                                                                                                                                                                                                                                                       |   |                                             |   |  |   |  |   |                                                |   |  |
| 1                                                                                                                                                                          |                                                                                                                                                                                                                                                                              |   |                                               |   |  |   |  |   |                                                     |   |  |                                                                                                                                                                                                                                                                              |   |                                                  |   |  |   |  |   |                                                  |   |  |                                                                                                                                                                                                                                                                            |   |                                                 |   |  |   |  |   |                                                 |   |  |                                                                                                                                                                                                                                                                                                  |   |                                                           |   |  |   |  |   |                                                             |   |  |                                                                                                                                                                                                                                                                       |   |                                             |   |  |   |  |   |                                                |   |  |
| 5                                                                                                                                                                          | This ethical standard is very easy to understand                                                                                                                                                                                                                             |   |                                               |   |  |   |  |   |                                                     |   |  |                                                                                                                                                                                                                                                                              |   |                                                  |   |  |   |  |   |                                                  |   |  |                                                                                                                                                                                                                                                                            |   |                                                 |   |  |   |  |   |                                                 |   |  |                                                                                                                                                                                                                                                                                                  |   |                                                           |   |  |   |  |   |                                                             |   |  |                                                                                                                                                                                                                                                                       |   |                                             |   |  |   |  |   |                                                |   |  |
| 4                                                                                                                                                                          |                                                                                                                                                                                                                                                                              |   |                                               |   |  |   |  |   |                                                     |   |  |                                                                                                                                                                                                                                                                              |   |                                                  |   |  |   |  |   |                                                  |   |  |                                                                                                                                                                                                                                                                            |   |                                                 |   |  |   |  |   |                                                 |   |  |                                                                                                                                                                                                                                                                                                  |   |                                                           |   |  |   |  |   |                                                             |   |  |                                                                                                                                                                                                                                                                       |   |                                             |   |  |   |  |   |                                                |   |  |
| 3                                                                                                                                                                          |                                                                                                                                                                                                                                                                              |   |                                               |   |  |   |  |   |                                                     |   |  |                                                                                                                                                                                                                                                                              |   |                                                  |   |  |   |  |   |                                                  |   |  |                                                                                                                                                                                                                                                                            |   |                                                 |   |  |   |  |   |                                                 |   |  |                                                                                                                                                                                                                                                                                                  |   |                                                           |   |  |   |  |   |                                                             |   |  |                                                                                                                                                                                                                                                                       |   |                                             |   |  |   |  |   |                                                |   |  |
| 2                                                                                                                                                                          | This ethical standard is very hard to understand                                                                                                                                                                                                                             |   |                                               |   |  |   |  |   |                                                     |   |  |                                                                                                                                                                                                                                                                              |   |                                                  |   |  |   |  |   |                                                  |   |  |                                                                                                                                                                                                                                                                            |   |                                                 |   |  |   |  |   |                                                 |   |  |                                                                                                                                                                                                                                                                                                  |   |                                                           |   |  |   |  |   |                                                             |   |  |                                                                                                                                                                                                                                                                       |   |                                             |   |  |   |  |   |                                                |   |  |
| 1                                                                                                                                                                          |                                                                                                                                                                                                                                                                              |   |                                               |   |  |   |  |   |                                                     |   |  |                                                                                                                                                                                                                                                                              |   |                                                  |   |  |   |  |   |                                                  |   |  |                                                                                                                                                                                                                                                                            |   |                                                 |   |  |   |  |   |                                                 |   |  |                                                                                                                                                                                                                                                                                                  |   |                                                           |   |  |   |  |   |                                                             |   |  |                                                                                                                                                                                                                                                                       |   |                                             |   |  |   |  |   |                                                |   |  |
| 5                                                                                                                                                                          | This ethical standard is very easy to implement                                                                                                                                                                                                                              |   |                                               |   |  |   |  |   |                                                     |   |  |                                                                                                                                                                                                                                                                              |   |                                                  |   |  |   |  |   |                                                  |   |  |                                                                                                                                                                                                                                                                            |   |                                                 |   |  |   |  |   |                                                 |   |  |                                                                                                                                                                                                                                                                                                  |   |                                                           |   |  |   |  |   |                                                             |   |  |                                                                                                                                                                                                                                                                       |   |                                             |   |  |   |  |   |                                                |   |  |
| 4                                                                                                                                                                          |                                                                                                                                                                                                                                                                              |   |                                               |   |  |   |  |   |                                                     |   |  |                                                                                                                                                                                                                                                                              |   |                                                  |   |  |   |  |   |                                                  |   |  |                                                                                                                                                                                                                                                                            |   |                                                 |   |  |   |  |   |                                                 |   |  |                                                                                                                                                                                                                                                                                                  |   |                                                           |   |  |   |  |   |                                                             |   |  |                                                                                                                                                                                                                                                                       |   |                                             |   |  |   |  |   |                                                |   |  |
| 3                                                                                                                                                                          |                                                                                                                                                                                                                                                                              |   |                                               |   |  |   |  |   |                                                     |   |  |                                                                                                                                                                                                                                                                              |   |                                                  |   |  |   |  |   |                                                  |   |  |                                                                                                                                                                                                                                                                            |   |                                                 |   |  |   |  |   |                                                 |   |  |                                                                                                                                                                                                                                                                                                  |   |                                                           |   |  |   |  |   |                                                             |   |  |                                                                                                                                                                                                                                                                       |   |                                             |   |  |   |  |   |                                                |   |  |
| 2                                                                                                                                                                          | This ethical standard is very hard to implement                                                                                                                                                                                                                              |   |                                               |   |  |   |  |   |                                                     |   |  |                                                                                                                                                                                                                                                                              |   |                                                  |   |  |   |  |   |                                                  |   |  |                                                                                                                                                                                                                                                                            |   |                                                 |   |  |   |  |   |                                                 |   |  |                                                                                                                                                                                                                                                                                                  |   |                                                           |   |  |   |  |   |                                                             |   |  |                                                                                                                                                                                                                                                                       |   |                                             |   |  |   |  |   |                                                |   |  |
| 1                                                                                                                                                                          |                                                                                                                                                                                                                                                                              |   |                                               |   |  |   |  |   |                                                     |   |  |                                                                                                                                                                                                                                                                              |   |                                                  |   |  |   |  |   |                                                  |   |  |                                                                                                                                                                                                                                                                            |   |                                                 |   |  |   |  |   |                                                 |   |  |                                                                                                                                                                                                                                                                                                  |   |                                                           |   |  |   |  |   |                                                             |   |  |                                                                                                                                                                                                                                                                       |   |                                             |   |  |   |  |   |                                                |   |  |
| 5                                                                                                                                                                          | This ethical standard greatly protects trial participants                                                                                                                                                                                                                    |   |                                               |   |  |   |  |   |                                                     |   |  |                                                                                                                                                                                                                                                                              |   |                                                  |   |  |   |  |   |                                                  |   |  |                                                                                                                                                                                                                                                                            |   |                                                 |   |  |   |  |   |                                                 |   |  |                                                                                                                                                                                                                                                                                                  |   |                                                           |   |  |   |  |   |                                                             |   |  |                                                                                                                                                                                                                                                                       |   |                                             |   |  |   |  |   |                                                |   |  |
| 4                                                                                                                                                                          |                                                                                                                                                                                                                                                                              |   |                                               |   |  |   |  |   |                                                     |   |  |                                                                                                                                                                                                                                                                              |   |                                                  |   |  |   |  |   |                                                  |   |  |                                                                                                                                                                                                                                                                            |   |                                                 |   |  |   |  |   |                                                 |   |  |                                                                                                                                                                                                                                                                                                  |   |                                                           |   |  |   |  |   |                                                             |   |  |                                                                                                                                                                                                                                                                       |   |                                             |   |  |   |  |   |                                                |   |  |
| 3                                                                                                                                                                          |                                                                                                                                                                                                                                                                              |   |                                               |   |  |   |  |   |                                                     |   |  |                                                                                                                                                                                                                                                                              |   |                                                  |   |  |   |  |   |                                                  |   |  |                                                                                                                                                                                                                                                                            |   |                                                 |   |  |   |  |   |                                                 |   |  |                                                                                                                                                                                                                                                                                                  |   |                                                           |   |  |   |  |   |                                                             |   |  |                                                                                                                                                                                                                                                                       |   |                                             |   |  |   |  |   |                                                |   |  |
| 2                                                                                                                                                                          | This ethical standard minimally protects trial participants                                                                                                                                                                                                                  |   |                                               |   |  |   |  |   |                                                     |   |  |                                                                                                                                                                                                                                                                              |   |                                                  |   |  |   |  |   |                                                  |   |  |                                                                                                                                                                                                                                                                            |   |                                                 |   |  |   |  |   |                                                 |   |  |                                                                                                                                                                                                                                                                                                  |   |                                                           |   |  |   |  |   |                                                             |   |  |                                                                                                                                                                                                                                                                       |   |                                             |   |  |   |  |   |                                                |   |  |
| 1                                                                                                                                                                          |                                                                                                                                                                                                                                                                              |   |                                               |   |  |   |  |   |                                                     |   |  |                                                                                                                                                                                                                                                                              |   |                                                  |   |  |   |  |   |                                                  |   |  |                                                                                                                                                                                                                                                                            |   |                                                 |   |  |   |  |   |                                                 |   |  |                                                                                                                                                                                                                                                                                                  |   |                                                           |   |  |   |  |   |                                                             |   |  |                                                                                                                                                                                                                                                                       |   |                                             |   |  |   |  |   |                                                |   |  |
| 5                                                                                                                                                                          | I strongly agree with this ethical standard                                                                                                                                                                                                                                  |   |                                               |   |  |   |  |   |                                                     |   |  |                                                                                                                                                                                                                                                                              |   |                                                  |   |  |   |  |   |                                                  |   |  |                                                                                                                                                                                                                                                                            |   |                                                 |   |  |   |  |   |                                                 |   |  |                                                                                                                                                                                                                                                                                                  |   |                                                           |   |  |   |  |   |                                                             |   |  |                                                                                                                                                                                                                                                                       |   |                                             |   |  |   |  |   |                                                |   |  |
| 4                                                                                                                                                                          |                                                                                                                                                                                                                                                                              |   |                                               |   |  |   |  |   |                                                     |   |  |                                                                                                                                                                                                                                                                              |   |                                                  |   |  |   |  |   |                                                  |   |  |                                                                                                                                                                                                                                                                            |   |                                                 |   |  |   |  |   |                                                 |   |  |                                                                                                                                                                                                                                                                                                  |   |                                                           |   |  |   |  |   |                                                             |   |  |                                                                                                                                                                                                                                                                       |   |                                             |   |  |   |  |   |                                                |   |  |
| 3                                                                                                                                                                          |                                                                                                                                                                                                                                                                              |   |                                               |   |  |   |  |   |                                                     |   |  |                                                                                                                                                                                                                                                                              |   |                                                  |   |  |   |  |   |                                                  |   |  |                                                                                                                                                                                                                                                                            |   |                                                 |   |  |   |  |   |                                                 |   |  |                                                                                                                                                                                                                                                                                                  |   |                                                           |   |  |   |  |   |                                                             |   |  |                                                                                                                                                                                                                                                                       |   |                                             |   |  |   |  |   |                                                |   |  |
| 2                                                                                                                                                                          | I strongly disagree with this ethical standard                                                                                                                                                                                                                               |   |                                               |   |  |   |  |   |                                                     |   |  |                                                                                                                                                                                                                                                                              |   |                                                  |   |  |   |  |   |                                                  |   |  |                                                                                                                                                                                                                                                                            |   |                                                 |   |  |   |  |   |                                                 |   |  |                                                                                                                                                                                                                                                                                                  |   |                                                           |   |  |   |  |   |                                                             |   |  |                                                                                                                                                                                                                                                                       |   |                                             |   |  |   |  |   |                                                |   |  |
| 1                                                                                                                                                                          |                                                                                                                                                                                                                                                                              |   |                                               |   |  |   |  |   |                                                     |   |  |                                                                                                                                                                                                                                                                              |   |                                                  |   |  |   |  |   |                                                  |   |  |                                                                                                                                                                                                                                                                            |   |                                                 |   |  |   |  |   |                                                 |   |  |                                                                                                                                                                                                                                                                                                  |   |                                                           |   |  |   |  |   |                                                             |   |  |                                                                                                                                                                                                                                                                       |   |                                             |   |  |   |  |   |                                                |   |  |
| 10. In the informed consent process, trial participants should be told what HIV prevention services they will receive.                                                     | <table border="1"> <tr><td>5</td><td>I am very familiar with this ethical standard</td></tr> <tr><td>4</td><td></td></tr> <tr><td>3</td><td></td></tr> <tr><td>2</td><td>I am not at all familiar with this ethical standard</td></tr> <tr><td>1</td><td></td></tr> </table> | 5 | I am very familiar with this ethical standard | 4 |  | 3 |  | 2 | I am not at all familiar with this ethical standard | 1 |  | <table border="1"> <tr><td>5</td><td>This ethical standard is very easy to understand</td></tr> <tr><td>4</td><td></td></tr> <tr><td>3</td><td></td></tr> <tr><td>2</td><td>This ethical standard is very hard to understand</td></tr> <tr><td>1</td><td></td></tr> </table> | 5 | This ethical standard is very easy to understand | 4 |  | 3 |  | 2 | This ethical standard is very hard to understand | 1 |  | <table border="1"> <tr><td>5</td><td>This ethical standard is very easy to implement</td></tr> <tr><td>4</td><td></td></tr> <tr><td>3</td><td></td></tr> <tr><td>2</td><td>This ethical standard is very hard to implement</td></tr> <tr><td>1</td><td></td></tr> </table> | 5 | This ethical standard is very easy to implement | 4 |  | 3 |  | 2 | This ethical standard is very hard to implement | 1 |  | <table border="1"> <tr><td>5</td><td>This ethical standard greatly protects trial participants</td></tr> <tr><td>4</td><td></td></tr> <tr><td>3</td><td></td></tr> <tr><td>2</td><td>This ethical standard minimally protects trial participants</td></tr> <tr><td>1</td><td></td></tr> </table> | 5 | This ethical standard greatly protects trial participants | 4 |  | 3 |  | 2 | This ethical standard minimally protects trial participants | 1 |  | <table border="1"> <tr><td>5</td><td>I strongly agree with this ethical standard</td></tr> <tr><td>4</td><td></td></tr> <tr><td>3</td><td></td></tr> <tr><td>2</td><td>I strongly disagree with this ethical standard</td></tr> <tr><td>1</td><td></td></tr> </table> | 5 | I strongly agree with this ethical standard | 4 |  | 3 |  | 2 | I strongly disagree with this ethical standard | 1 |  |
| 5                                                                                                                                                                          | I am very familiar with this ethical standard                                                                                                                                                                                                                                |   |                                               |   |  |   |  |   |                                                     |   |  |                                                                                                                                                                                                                                                                              |   |                                                  |   |  |   |  |   |                                                  |   |  |                                                                                                                                                                                                                                                                            |   |                                                 |   |  |   |  |   |                                                 |   |  |                                                                                                                                                                                                                                                                                                  |   |                                                           |   |  |   |  |   |                                                             |   |  |                                                                                                                                                                                                                                                                       |   |                                             |   |  |   |  |   |                                                |   |  |
| 4                                                                                                                                                                          |                                                                                                                                                                                                                                                                              |   |                                               |   |  |   |  |   |                                                     |   |  |                                                                                                                                                                                                                                                                              |   |                                                  |   |  |   |  |   |                                                  |   |  |                                                                                                                                                                                                                                                                            |   |                                                 |   |  |   |  |   |                                                 |   |  |                                                                                                                                                                                                                                                                                                  |   |                                                           |   |  |   |  |   |                                                             |   |  |                                                                                                                                                                                                                                                                       |   |                                             |   |  |   |  |   |                                                |   |  |
| 3                                                                                                                                                                          |                                                                                                                                                                                                                                                                              |   |                                               |   |  |   |  |   |                                                     |   |  |                                                                                                                                                                                                                                                                              |   |                                                  |   |  |   |  |   |                                                  |   |  |                                                                                                                                                                                                                                                                            |   |                                                 |   |  |   |  |   |                                                 |   |  |                                                                                                                                                                                                                                                                                                  |   |                                                           |   |  |   |  |   |                                                             |   |  |                                                                                                                                                                                                                                                                       |   |                                             |   |  |   |  |   |                                                |   |  |
| 2                                                                                                                                                                          | I am not at all familiar with this ethical standard                                                                                                                                                                                                                          |   |                                               |   |  |   |  |   |                                                     |   |  |                                                                                                                                                                                                                                                                              |   |                                                  |   |  |   |  |   |                                                  |   |  |                                                                                                                                                                                                                                                                            |   |                                                 |   |  |   |  |   |                                                 |   |  |                                                                                                                                                                                                                                                                                                  |   |                                                           |   |  |   |  |   |                                                             |   |  |                                                                                                                                                                                                                                                                       |   |                                             |   |  |   |  |   |                                                |   |  |
| 1                                                                                                                                                                          |                                                                                                                                                                                                                                                                              |   |                                               |   |  |   |  |   |                                                     |   |  |                                                                                                                                                                                                                                                                              |   |                                                  |   |  |   |  |   |                                                  |   |  |                                                                                                                                                                                                                                                                            |   |                                                 |   |  |   |  |   |                                                 |   |  |                                                                                                                                                                                                                                                                                                  |   |                                                           |   |  |   |  |   |                                                             |   |  |                                                                                                                                                                                                                                                                       |   |                                             |   |  |   |  |   |                                                |   |  |
| 5                                                                                                                                                                          | This ethical standard is very easy to understand                                                                                                                                                                                                                             |   |                                               |   |  |   |  |   |                                                     |   |  |                                                                                                                                                                                                                                                                              |   |                                                  |   |  |   |  |   |                                                  |   |  |                                                                                                                                                                                                                                                                            |   |                                                 |   |  |   |  |   |                                                 |   |  |                                                                                                                                                                                                                                                                                                  |   |                                                           |   |  |   |  |   |                                                             |   |  |                                                                                                                                                                                                                                                                       |   |                                             |   |  |   |  |   |                                                |   |  |
| 4                                                                                                                                                                          |                                                                                                                                                                                                                                                                              |   |                                               |   |  |   |  |   |                                                     |   |  |                                                                                                                                                                                                                                                                              |   |                                                  |   |  |   |  |   |                                                  |   |  |                                                                                                                                                                                                                                                                            |   |                                                 |   |  |   |  |   |                                                 |   |  |                                                                                                                                                                                                                                                                                                  |   |                                                           |   |  |   |  |   |                                                             |   |  |                                                                                                                                                                                                                                                                       |   |                                             |   |  |   |  |   |                                                |   |  |
| 3                                                                                                                                                                          |                                                                                                                                                                                                                                                                              |   |                                               |   |  |   |  |   |                                                     |   |  |                                                                                                                                                                                                                                                                              |   |                                                  |   |  |   |  |   |                                                  |   |  |                                                                                                                                                                                                                                                                            |   |                                                 |   |  |   |  |   |                                                 |   |  |                                                                                                                                                                                                                                                                                                  |   |                                                           |   |  |   |  |   |                                                             |   |  |                                                                                                                                                                                                                                                                       |   |                                             |   |  |   |  |   |                                                |   |  |
| 2                                                                                                                                                                          | This ethical standard is very hard to understand                                                                                                                                                                                                                             |   |                                               |   |  |   |  |   |                                                     |   |  |                                                                                                                                                                                                                                                                              |   |                                                  |   |  |   |  |   |                                                  |   |  |                                                                                                                                                                                                                                                                            |   |                                                 |   |  |   |  |   |                                                 |   |  |                                                                                                                                                                                                                                                                                                  |   |                                                           |   |  |   |  |   |                                                             |   |  |                                                                                                                                                                                                                                                                       |   |                                             |   |  |   |  |   |                                                |   |  |
| 1                                                                                                                                                                          |                                                                                                                                                                                                                                                                              |   |                                               |   |  |   |  |   |                                                     |   |  |                                                                                                                                                                                                                                                                              |   |                                                  |   |  |   |  |   |                                                  |   |  |                                                                                                                                                                                                                                                                            |   |                                                 |   |  |   |  |   |                                                 |   |  |                                                                                                                                                                                                                                                                                                  |   |                                                           |   |  |   |  |   |                                                             |   |  |                                                                                                                                                                                                                                                                       |   |                                             |   |  |   |  |   |                                                |   |  |
| 5                                                                                                                                                                          | This ethical standard is very easy to implement                                                                                                                                                                                                                              |   |                                               |   |  |   |  |   |                                                     |   |  |                                                                                                                                                                                                                                                                              |   |                                                  |   |  |   |  |   |                                                  |   |  |                                                                                                                                                                                                                                                                            |   |                                                 |   |  |   |  |   |                                                 |   |  |                                                                                                                                                                                                                                                                                                  |   |                                                           |   |  |   |  |   |                                                             |   |  |                                                                                                                                                                                                                                                                       |   |                                             |   |  |   |  |   |                                                |   |  |
| 4                                                                                                                                                                          |                                                                                                                                                                                                                                                                              |   |                                               |   |  |   |  |   |                                                     |   |  |                                                                                                                                                                                                                                                                              |   |                                                  |   |  |   |  |   |                                                  |   |  |                                                                                                                                                                                                                                                                            |   |                                                 |   |  |   |  |   |                                                 |   |  |                                                                                                                                                                                                                                                                                                  |   |                                                           |   |  |   |  |   |                                                             |   |  |                                                                                                                                                                                                                                                                       |   |                                             |   |  |   |  |   |                                                |   |  |
| 3                                                                                                                                                                          |                                                                                                                                                                                                                                                                              |   |                                               |   |  |   |  |   |                                                     |   |  |                                                                                                                                                                                                                                                                              |   |                                                  |   |  |   |  |   |                                                  |   |  |                                                                                                                                                                                                                                                                            |   |                                                 |   |  |   |  |   |                                                 |   |  |                                                                                                                                                                                                                                                                                                  |   |                                                           |   |  |   |  |   |                                                             |   |  |                                                                                                                                                                                                                                                                       |   |                                             |   |  |   |  |   |                                                |   |  |
| 2                                                                                                                                                                          | This ethical standard is very hard to implement                                                                                                                                                                                                                              |   |                                               |   |  |   |  |   |                                                     |   |  |                                                                                                                                                                                                                                                                              |   |                                                  |   |  |   |  |   |                                                  |   |  |                                                                                                                                                                                                                                                                            |   |                                                 |   |  |   |  |   |                                                 |   |  |                                                                                                                                                                                                                                                                                                  |   |                                                           |   |  |   |  |   |                                                             |   |  |                                                                                                                                                                                                                                                                       |   |                                             |   |  |   |  |   |                                                |   |  |
| 1                                                                                                                                                                          |                                                                                                                                                                                                                                                                              |   |                                               |   |  |   |  |   |                                                     |   |  |                                                                                                                                                                                                                                                                              |   |                                                  |   |  |   |  |   |                                                  |   |  |                                                                                                                                                                                                                                                                            |   |                                                 |   |  |   |  |   |                                                 |   |  |                                                                                                                                                                                                                                                                                                  |   |                                                           |   |  |   |  |   |                                                             |   |  |                                                                                                                                                                                                                                                                       |   |                                             |   |  |   |  |   |                                                |   |  |
| 5                                                                                                                                                                          | This ethical standard greatly protects trial participants                                                                                                                                                                                                                    |   |                                               |   |  |   |  |   |                                                     |   |  |                                                                                                                                                                                                                                                                              |   |                                                  |   |  |   |  |   |                                                  |   |  |                                                                                                                                                                                                                                                                            |   |                                                 |   |  |   |  |   |                                                 |   |  |                                                                                                                                                                                                                                                                                                  |   |                                                           |   |  |   |  |   |                                                             |   |  |                                                                                                                                                                                                                                                                       |   |                                             |   |  |   |  |   |                                                |   |  |
| 4                                                                                                                                                                          |                                                                                                                                                                                                                                                                              |   |                                               |   |  |   |  |   |                                                     |   |  |                                                                                                                                                                                                                                                                              |   |                                                  |   |  |   |  |   |                                                  |   |  |                                                                                                                                                                                                                                                                            |   |                                                 |   |  |   |  |   |                                                 |   |  |                                                                                                                                                                                                                                                                                                  |   |                                                           |   |  |   |  |   |                                                             |   |  |                                                                                                                                                                                                                                                                       |   |                                             |   |  |   |  |   |                                                |   |  |
| 3                                                                                                                                                                          |                                                                                                                                                                                                                                                                              |   |                                               |   |  |   |  |   |                                                     |   |  |                                                                                                                                                                                                                                                                              |   |                                                  |   |  |   |  |   |                                                  |   |  |                                                                                                                                                                                                                                                                            |   |                                                 |   |  |   |  |   |                                                 |   |  |                                                                                                                                                                                                                                                                                                  |   |                                                           |   |  |   |  |   |                                                             |   |  |                                                                                                                                                                                                                                                                       |   |                                             |   |  |   |  |   |                                                |   |  |
| 2                                                                                                                                                                          | This ethical standard minimally protects trial participants                                                                                                                                                                                                                  |   |                                               |   |  |   |  |   |                                                     |   |  |                                                                                                                                                                                                                                                                              |   |                                                  |   |  |   |  |   |                                                  |   |  |                                                                                                                                                                                                                                                                            |   |                                                 |   |  |   |  |   |                                                 |   |  |                                                                                                                                                                                                                                                                                                  |   |                                                           |   |  |   |  |   |                                                             |   |  |                                                                                                                                                                                                                                                                       |   |                                             |   |  |   |  |   |                                                |   |  |
| 1                                                                                                                                                                          |                                                                                                                                                                                                                                                                              |   |                                               |   |  |   |  |   |                                                     |   |  |                                                                                                                                                                                                                                                                              |   |                                                  |   |  |   |  |   |                                                  |   |  |                                                                                                                                                                                                                                                                            |   |                                                 |   |  |   |  |   |                                                 |   |  |                                                                                                                                                                                                                                                                                                  |   |                                                           |   |  |   |  |   |                                                             |   |  |                                                                                                                                                                                                                                                                       |   |                                             |   |  |   |  |   |                                                |   |  |
| 5                                                                                                                                                                          | I strongly agree with this ethical standard                                                                                                                                                                                                                                  |   |                                               |   |  |   |  |   |                                                     |   |  |                                                                                                                                                                                                                                                                              |   |                                                  |   |  |   |  |   |                                                  |   |  |                                                                                                                                                                                                                                                                            |   |                                                 |   |  |   |  |   |                                                 |   |  |                                                                                                                                                                                                                                                                                                  |   |                                                           |   |  |   |  |   |                                                             |   |  |                                                                                                                                                                                                                                                                       |   |                                             |   |  |   |  |   |                                                |   |  |
| 4                                                                                                                                                                          |                                                                                                                                                                                                                                                                              |   |                                               |   |  |   |  |   |                                                     |   |  |                                                                                                                                                                                                                                                                              |   |                                                  |   |  |   |  |   |                                                  |   |  |                                                                                                                                                                                                                                                                            |   |                                                 |   |  |   |  |   |                                                 |   |  |                                                                                                                                                                                                                                                                                                  |   |                                                           |   |  |   |  |   |                                                             |   |  |                                                                                                                                                                                                                                                                       |   |                                             |   |  |   |  |   |                                                |   |  |
| 3                                                                                                                                                                          |                                                                                                                                                                                                                                                                              |   |                                               |   |  |   |  |   |                                                     |   |  |                                                                                                                                                                                                                                                                              |   |                                                  |   |  |   |  |   |                                                  |   |  |                                                                                                                                                                                                                                                                            |   |                                                 |   |  |   |  |   |                                                 |   |  |                                                                                                                                                                                                                                                                                                  |   |                                                           |   |  |   |  |   |                                                             |   |  |                                                                                                                                                                                                                                                                       |   |                                             |   |  |   |  |   |                                                |   |  |
| 2                                                                                                                                                                          | I strongly disagree with this ethical standard                                                                                                                                                                                                                               |   |                                               |   |  |   |  |   |                                                     |   |  |                                                                                                                                                                                                                                                                              |   |                                                  |   |  |   |  |   |                                                  |   |  |                                                                                                                                                                                                                                                                            |   |                                                 |   |  |   |  |   |                                                 |   |  |                                                                                                                                                                                                                                                                                                  |   |                                                           |   |  |   |  |   |                                                             |   |  |                                                                                                                                                                                                                                                                       |   |                                             |   |  |   |  |   |                                                |   |  |
| 1                                                                                                                                                                          |                                                                                                                                                                                                                                                                              |   |                                               |   |  |   |  |   |                                                     |   |  |                                                                                                                                                                                                                                                                              |   |                                                  |   |  |   |  |   |                                                  |   |  |                                                                                                                                                                                                                                                                            |   |                                                 |   |  |   |  |   |                                                 |   |  |                                                                                                                                                                                                                                                                                                  |   |                                                           |   |  |   |  |   |                                                             |   |  |                                                                                                                                                                                                                                                                       |   |                                             |   |  |   |  |   |                                                |   |  |
| 11. Trial participants should get access to optimal care and treatment for HIV infection, including ART.                                                                   | <table border="1"> <tr><td>5</td><td>I am very familiar with this ethical standard</td></tr> <tr><td>4</td><td></td></tr> <tr><td>3</td><td></td></tr> <tr><td>2</td><td>I am not at all familiar with this ethical standard</td></tr> <tr><td>1</td><td></td></tr> </table> | 5 | I am very familiar with this ethical standard | 4 |  | 3 |  | 2 | I am not at all familiar with this ethical standard | 1 |  | <table border="1"> <tr><td>5</td><td>This ethical standard is very easy to understand</td></tr> <tr><td>4</td><td></td></tr> <tr><td>3</td><td></td></tr> <tr><td>2</td><td>This ethical standard is very hard to understand</td></tr> <tr><td>1</td><td></td></tr> </table> | 5 | This ethical standard is very easy to understand | 4 |  | 3 |  | 2 | This ethical standard is very hard to understand | 1 |  | <table border="1"> <tr><td>5</td><td>This ethical standard is very easy to implement</td></tr> <tr><td>4</td><td></td></tr> <tr><td>3</td><td></td></tr> <tr><td>2</td><td>This ethical standard is very hard to implement</td></tr> <tr><td>1</td><td></td></tr> </table> | 5 | This ethical standard is very easy to implement | 4 |  | 3 |  | 2 | This ethical standard is very hard to implement | 1 |  | <table border="1"> <tr><td>5</td><td>This ethical standard greatly protects trial participants</td></tr> <tr><td>4</td><td></td></tr> <tr><td>3</td><td></td></tr> <tr><td>2</td><td>This ethical standard minimally protects trial participants</td></tr> <tr><td>1</td><td></td></tr> </table> | 5 | This ethical standard greatly protects trial participants | 4 |  | 3 |  | 2 | This ethical standard minimally protects trial participants | 1 |  | <table border="1"> <tr><td>5</td><td>I strongly agree with this ethical standard</td></tr> <tr><td>4</td><td></td></tr> <tr><td>3</td><td></td></tr> <tr><td>2</td><td>I strongly disagree with this ethical standard</td></tr> <tr><td>1</td><td></td></tr> </table> | 5 | I strongly agree with this ethical standard | 4 |  | 3 |  | 2 | I strongly disagree with this ethical standard | 1 |  |
| 5                                                                                                                                                                          | I am very familiar with this ethical standard                                                                                                                                                                                                                                |   |                                               |   |  |   |  |   |                                                     |   |  |                                                                                                                                                                                                                                                                              |   |                                                  |   |  |   |  |   |                                                  |   |  |                                                                                                                                                                                                                                                                            |   |                                                 |   |  |   |  |   |                                                 |   |  |                                                                                                                                                                                                                                                                                                  |   |                                                           |   |  |   |  |   |                                                             |   |  |                                                                                                                                                                                                                                                                       |   |                                             |   |  |   |  |   |                                                |   |  |
| 4                                                                                                                                                                          |                                                                                                                                                                                                                                                                              |   |                                               |   |  |   |  |   |                                                     |   |  |                                                                                                                                                                                                                                                                              |   |                                                  |   |  |   |  |   |                                                  |   |  |                                                                                                                                                                                                                                                                            |   |                                                 |   |  |   |  |   |                                                 |   |  |                                                                                                                                                                                                                                                                                                  |   |                                                           |   |  |   |  |   |                                                             |   |  |                                                                                                                                                                                                                                                                       |   |                                             |   |  |   |  |   |                                                |   |  |
| 3                                                                                                                                                                          |                                                                                                                                                                                                                                                                              |   |                                               |   |  |   |  |   |                                                     |   |  |                                                                                                                                                                                                                                                                              |   |                                                  |   |  |   |  |   |                                                  |   |  |                                                                                                                                                                                                                                                                            |   |                                                 |   |  |   |  |   |                                                 |   |  |                                                                                                                                                                                                                                                                                                  |   |                                                           |   |  |   |  |   |                                                             |   |  |                                                                                                                                                                                                                                                                       |   |                                             |   |  |   |  |   |                                                |   |  |
| 2                                                                                                                                                                          | I am not at all familiar with this ethical standard                                                                                                                                                                                                                          |   |                                               |   |  |   |  |   |                                                     |   |  |                                                                                                                                                                                                                                                                              |   |                                                  |   |  |   |  |   |                                                  |   |  |                                                                                                                                                                                                                                                                            |   |                                                 |   |  |   |  |   |                                                 |   |  |                                                                                                                                                                                                                                                                                                  |   |                                                           |   |  |   |  |   |                                                             |   |  |                                                                                                                                                                                                                                                                       |   |                                             |   |  |   |  |   |                                                |   |  |
| 1                                                                                                                                                                          |                                                                                                                                                                                                                                                                              |   |                                               |   |  |   |  |   |                                                     |   |  |                                                                                                                                                                                                                                                                              |   |                                                  |   |  |   |  |   |                                                  |   |  |                                                                                                                                                                                                                                                                            |   |                                                 |   |  |   |  |   |                                                 |   |  |                                                                                                                                                                                                                                                                                                  |   |                                                           |   |  |   |  |   |                                                             |   |  |                                                                                                                                                                                                                                                                       |   |                                             |   |  |   |  |   |                                                |   |  |
| 5                                                                                                                                                                          | This ethical standard is very easy to understand                                                                                                                                                                                                                             |   |                                               |   |  |   |  |   |                                                     |   |  |                                                                                                                                                                                                                                                                              |   |                                                  |   |  |   |  |   |                                                  |   |  |                                                                                                                                                                                                                                                                            |   |                                                 |   |  |   |  |   |                                                 |   |  |                                                                                                                                                                                                                                                                                                  |   |                                                           |   |  |   |  |   |                                                             |   |  |                                                                                                                                                                                                                                                                       |   |                                             |   |  |   |  |   |                                                |   |  |
| 4                                                                                                                                                                          |                                                                                                                                                                                                                                                                              |   |                                               |   |  |   |  |   |                                                     |   |  |                                                                                                                                                                                                                                                                              |   |                                                  |   |  |   |  |   |                                                  |   |  |                                                                                                                                                                                                                                                                            |   |                                                 |   |  |   |  |   |                                                 |   |  |                                                                                                                                                                                                                                                                                                  |   |                                                           |   |  |   |  |   |                                                             |   |  |                                                                                                                                                                                                                                                                       |   |                                             |   |  |   |  |   |                                                |   |  |
| 3                                                                                                                                                                          |                                                                                                                                                                                                                                                                              |   |                                               |   |  |   |  |   |                                                     |   |  |                                                                                                                                                                                                                                                                              |   |                                                  |   |  |   |  |   |                                                  |   |  |                                                                                                                                                                                                                                                                            |   |                                                 |   |  |   |  |   |                                                 |   |  |                                                                                                                                                                                                                                                                                                  |   |                                                           |   |  |   |  |   |                                                             |   |  |                                                                                                                                                                                                                                                                       |   |                                             |   |  |   |  |   |                                                |   |  |
| 2                                                                                                                                                                          | This ethical standard is very hard to understand                                                                                                                                                                                                                             |   |                                               |   |  |   |  |   |                                                     |   |  |                                                                                                                                                                                                                                                                              |   |                                                  |   |  |   |  |   |                                                  |   |  |                                                                                                                                                                                                                                                                            |   |                                                 |   |  |   |  |   |                                                 |   |  |                                                                                                                                                                                                                                                                                                  |   |                                                           |   |  |   |  |   |                                                             |   |  |                                                                                                                                                                                                                                                                       |   |                                             |   |  |   |  |   |                                                |   |  |
| 1                                                                                                                                                                          |                                                                                                                                                                                                                                                                              |   |                                               |   |  |   |  |   |                                                     |   |  |                                                                                                                                                                                                                                                                              |   |                                                  |   |  |   |  |   |                                                  |   |  |                                                                                                                                                                                                                                                                            |   |                                                 |   |  |   |  |   |                                                 |   |  |                                                                                                                                                                                                                                                                                                  |   |                                                           |   |  |   |  |   |                                                             |   |  |                                                                                                                                                                                                                                                                       |   |                                             |   |  |   |  |   |                                                |   |  |
| 5                                                                                                                                                                          | This ethical standard is very easy to implement                                                                                                                                                                                                                              |   |                                               |   |  |   |  |   |                                                     |   |  |                                                                                                                                                                                                                                                                              |   |                                                  |   |  |   |  |   |                                                  |   |  |                                                                                                                                                                                                                                                                            |   |                                                 |   |  |   |  |   |                                                 |   |  |                                                                                                                                                                                                                                                                                                  |   |                                                           |   |  |   |  |   |                                                             |   |  |                                                                                                                                                                                                                                                                       |   |                                             |   |  |   |  |   |                                                |   |  |
| 4                                                                                                                                                                          |                                                                                                                                                                                                                                                                              |   |                                               |   |  |   |  |   |                                                     |   |  |                                                                                                                                                                                                                                                                              |   |                                                  |   |  |   |  |   |                                                  |   |  |                                                                                                                                                                                                                                                                            |   |                                                 |   |  |   |  |   |                                                 |   |  |                                                                                                                                                                                                                                                                                                  |   |                                                           |   |  |   |  |   |                                                             |   |  |                                                                                                                                                                                                                                                                       |   |                                             |   |  |   |  |   |                                                |   |  |
| 3                                                                                                                                                                          |                                                                                                                                                                                                                                                                              |   |                                               |   |  |   |  |   |                                                     |   |  |                                                                                                                                                                                                                                                                              |   |                                                  |   |  |   |  |   |                                                  |   |  |                                                                                                                                                                                                                                                                            |   |                                                 |   |  |   |  |   |                                                 |   |  |                                                                                                                                                                                                                                                                                                  |   |                                                           |   |  |   |  |   |                                                             |   |  |                                                                                                                                                                                                                                                                       |   |                                             |   |  |   |  |   |                                                |   |  |
| 2                                                                                                                                                                          | This ethical standard is very hard to implement                                                                                                                                                                                                                              |   |                                               |   |  |   |  |   |                                                     |   |  |                                                                                                                                                                                                                                                                              |   |                                                  |   |  |   |  |   |                                                  |   |  |                                                                                                                                                                                                                                                                            |   |                                                 |   |  |   |  |   |                                                 |   |  |                                                                                                                                                                                                                                                                                                  |   |                                                           |   |  |   |  |   |                                                             |   |  |                                                                                                                                                                                                                                                                       |   |                                             |   |  |   |  |   |                                                |   |  |
| 1                                                                                                                                                                          |                                                                                                                                                                                                                                                                              |   |                                               |   |  |   |  |   |                                                     |   |  |                                                                                                                                                                                                                                                                              |   |                                                  |   |  |   |  |   |                                                  |   |  |                                                                                                                                                                                                                                                                            |   |                                                 |   |  |   |  |   |                                                 |   |  |                                                                                                                                                                                                                                                                                                  |   |                                                           |   |  |   |  |   |                                                             |   |  |                                                                                                                                                                                                                                                                       |   |                                             |   |  |   |  |   |                                                |   |  |
| 5                                                                                                                                                                          | This ethical standard greatly protects trial participants                                                                                                                                                                                                                    |   |                                               |   |  |   |  |   |                                                     |   |  |                                                                                                                                                                                                                                                                              |   |                                                  |   |  |   |  |   |                                                  |   |  |                                                                                                                                                                                                                                                                            |   |                                                 |   |  |   |  |   |                                                 |   |  |                                                                                                                                                                                                                                                                                                  |   |                                                           |   |  |   |  |   |                                                             |   |  |                                                                                                                                                                                                                                                                       |   |                                             |   |  |   |  |   |                                                |   |  |
| 4                                                                                                                                                                          |                                                                                                                                                                                                                                                                              |   |                                               |   |  |   |  |   |                                                     |   |  |                                                                                                                                                                                                                                                                              |   |                                                  |   |  |   |  |   |                                                  |   |  |                                                                                                                                                                                                                                                                            |   |                                                 |   |  |   |  |   |                                                 |   |  |                                                                                                                                                                                                                                                                                                  |   |                                                           |   |  |   |  |   |                                                             |   |  |                                                                                                                                                                                                                                                                       |   |                                             |   |  |   |  |   |                                                |   |  |
| 3                                                                                                                                                                          |                                                                                                                                                                                                                                                                              |   |                                               |   |  |   |  |   |                                                     |   |  |                                                                                                                                                                                                                                                                              |   |                                                  |   |  |   |  |   |                                                  |   |  |                                                                                                                                                                                                                                                                            |   |                                                 |   |  |   |  |   |                                                 |   |  |                                                                                                                                                                                                                                                                                                  |   |                                                           |   |  |   |  |   |                                                             |   |  |                                                                                                                                                                                                                                                                       |   |                                             |   |  |   |  |   |                                                |   |  |
| 2                                                                                                                                                                          | This ethical standard minimally protects trial participants                                                                                                                                                                                                                  |   |                                               |   |  |   |  |   |                                                     |   |  |                                                                                                                                                                                                                                                                              |   |                                                  |   |  |   |  |   |                                                  |   |  |                                                                                                                                                                                                                                                                            |   |                                                 |   |  |   |  |   |                                                 |   |  |                                                                                                                                                                                                                                                                                                  |   |                                                           |   |  |   |  |   |                                                             |   |  |                                                                                                                                                                                                                                                                       |   |                                             |   |  |   |  |   |                                                |   |  |
| 1                                                                                                                                                                          |                                                                                                                                                                                                                                                                              |   |                                               |   |  |   |  |   |                                                     |   |  |                                                                                                                                                                                                                                                                              |   |                                                  |   |  |   |  |   |                                                  |   |  |                                                                                                                                                                                                                                                                            |   |                                                 |   |  |   |  |   |                                                 |   |  |                                                                                                                                                                                                                                                                                                  |   |                                                           |   |  |   |  |   |                                                             |   |  |                                                                                                                                                                                                                                                                       |   |                                             |   |  |   |  |   |                                                |   |  |
| 5                                                                                                                                                                          | I strongly agree with this ethical standard                                                                                                                                                                                                                                  |   |                                               |   |  |   |  |   |                                                     |   |  |                                                                                                                                                                                                                                                                              |   |                                                  |   |  |   |  |   |                                                  |   |  |                                                                                                                                                                                                                                                                            |   |                                                 |   |  |   |  |   |                                                 |   |  |                                                                                                                                                                                                                                                                                                  |   |                                                           |   |  |   |  |   |                                                             |   |  |                                                                                                                                                                                                                                                                       |   |                                             |   |  |   |  |   |                                                |   |  |
| 4                                                                                                                                                                          |                                                                                                                                                                                                                                                                              |   |                                               |   |  |   |  |   |                                                     |   |  |                                                                                                                                                                                                                                                                              |   |                                                  |   |  |   |  |   |                                                  |   |  |                                                                                                                                                                                                                                                                            |   |                                                 |   |  |   |  |   |                                                 |   |  |                                                                                                                                                                                                                                                                                                  |   |                                                           |   |  |   |  |   |                                                             |   |  |                                                                                                                                                                                                                                                                       |   |                                             |   |  |   |  |   |                                                |   |  |
| 3                                                                                                                                                                          |                                                                                                                                                                                                                                                                              |   |                                               |   |  |   |  |   |                                                     |   |  |                                                                                                                                                                                                                                                                              |   |                                                  |   |  |   |  |   |                                                  |   |  |                                                                                                                                                                                                                                                                            |   |                                                 |   |  |   |  |   |                                                 |   |  |                                                                                                                                                                                                                                                                                                  |   |                                                           |   |  |   |  |   |                                                             |   |  |                                                                                                                                                                                                                                                                       |   |                                             |   |  |   |  |   |                                                |   |  |
| 2                                                                                                                                                                          | I strongly disagree with this ethical standard                                                                                                                                                                                                                               |   |                                               |   |  |   |  |   |                                                     |   |  |                                                                                                                                                                                                                                                                              |   |                                                  |   |  |   |  |   |                                                  |   |  |                                                                                                                                                                                                                                                                            |   |                                                 |   |  |   |  |   |                                                 |   |  |                                                                                                                                                                                                                                                                                                  |   |                                                           |   |  |   |  |   |                                                             |   |  |                                                                                                                                                                                                                                                                       |   |                                             |   |  |   |  |   |                                                |   |  |
| 1                                                                                                                                                                          |                                                                                                                                                                                                                                                                              |   |                                               |   |  |   |  |   |                                                     |   |  |                                                                                                                                                                                                                                                                              |   |                                                  |   |  |   |  |   |                                                  |   |  |                                                                                                                                                                                                                                                                            |   |                                                 |   |  |   |  |   |                                                 |   |  |                                                                                                                                                                                                                                                                                                  |   |                                                           |   |  |   |  |   |                                                             |   |  |                                                                                                                                                                                                                                                                       |   |                                             |   |  |   |  |   |                                                |   |  |
| 12. Trials should not be conducted when agreements have not been reached among all stakeholders regarding access to care and treatment.                                    | <table border="1"> <tr><td>5</td><td>I am very familiar with this ethical standard</td></tr> <tr><td>4</td><td></td></tr> <tr><td>3</td><td></td></tr> <tr><td>2</td><td>I am not at all familiar with this ethical standard</td></tr> <tr><td>1</td><td></td></tr> </table> | 5 | I am very familiar with this ethical standard | 4 |  | 3 |  | 2 | I am not at all familiar with this ethical standard | 1 |  | <table border="1"> <tr><td>5</td><td>This ethical standard is very easy to understand</td></tr> <tr><td>4</td><td></td></tr> <tr><td>3</td><td></td></tr> <tr><td>2</td><td>This ethical standard is very hard to understand</td></tr> <tr><td>1</td><td></td></tr> </table> | 5 | This ethical standard is very easy to understand | 4 |  | 3 |  | 2 | This ethical standard is very hard to understand | 1 |  | <table border="1"> <tr><td>5</td><td>This ethical standard is very easy to implement</td></tr> <tr><td>4</td><td></td></tr> <tr><td>3</td><td></td></tr> <tr><td>2</td><td>This ethical standard is very hard to implement</td></tr> <tr><td>1</td><td></td></tr> </table> | 5 | This ethical standard is very easy to implement | 4 |  | 3 |  | 2 | This ethical standard is very hard to implement | 1 |  | <table border="1"> <tr><td>5</td><td>This ethical standard greatly protects trial participants</td></tr> <tr><td>4</td><td></td></tr> <tr><td>3</td><td></td></tr> <tr><td>2</td><td>This ethical standard minimally protects trial participants</td></tr> <tr><td>1</td><td></td></tr> </table> | 5 | This ethical standard greatly protects trial participants | 4 |  | 3 |  | 2 | This ethical standard minimally protects trial participants | 1 |  | <table border="1"> <tr><td>5</td><td>I strongly agree with this ethical standard</td></tr> <tr><td>4</td><td></td></tr> <tr><td>3</td><td></td></tr> <tr><td>2</td><td>I strongly disagree with this ethical standard</td></tr> <tr><td>1</td><td></td></tr> </table> | 5 | I strongly agree with this ethical standard | 4 |  | 3 |  | 2 | I strongly disagree with this ethical standard | 1 |  |
| 5                                                                                                                                                                          | I am very familiar with this ethical standard                                                                                                                                                                                                                                |   |                                               |   |  |   |  |   |                                                     |   |  |                                                                                                                                                                                                                                                                              |   |                                                  |   |  |   |  |   |                                                  |   |  |                                                                                                                                                                                                                                                                            |   |                                                 |   |  |   |  |   |                                                 |   |  |                                                                                                                                                                                                                                                                                                  |   |                                                           |   |  |   |  |   |                                                             |   |  |                                                                                                                                                                                                                                                                       |   |                                             |   |  |   |  |   |                                                |   |  |
| 4                                                                                                                                                                          |                                                                                                                                                                                                                                                                              |   |                                               |   |  |   |  |   |                                                     |   |  |                                                                                                                                                                                                                                                                              |   |                                                  |   |  |   |  |   |                                                  |   |  |                                                                                                                                                                                                                                                                            |   |                                                 |   |  |   |  |   |                                                 |   |  |                                                                                                                                                                                                                                                                                                  |   |                                                           |   |  |   |  |   |                                                             |   |  |                                                                                                                                                                                                                                                                       |   |                                             |   |  |   |  |   |                                                |   |  |
| 3                                                                                                                                                                          |                                                                                                                                                                                                                                                                              |   |                                               |   |  |   |  |   |                                                     |   |  |                                                                                                                                                                                                                                                                              |   |                                                  |   |  |   |  |   |                                                  |   |  |                                                                                                                                                                                                                                                                            |   |                                                 |   |  |   |  |   |                                                 |   |  |                                                                                                                                                                                                                                                                                                  |   |                                                           |   |  |   |  |   |                                                             |   |  |                                                                                                                                                                                                                                                                       |   |                                             |   |  |   |  |   |                                                |   |  |
| 2                                                                                                                                                                          | I am not at all familiar with this ethical standard                                                                                                                                                                                                                          |   |                                               |   |  |   |  |   |                                                     |   |  |                                                                                                                                                                                                                                                                              |   |                                                  |   |  |   |  |   |                                                  |   |  |                                                                                                                                                                                                                                                                            |   |                                                 |   |  |   |  |   |                                                 |   |  |                                                                                                                                                                                                                                                                                                  |   |                                                           |   |  |   |  |   |                                                             |   |  |                                                                                                                                                                                                                                                                       |   |                                             |   |  |   |  |   |                                                |   |  |
| 1                                                                                                                                                                          |                                                                                                                                                                                                                                                                              |   |                                               |   |  |   |  |   |                                                     |   |  |                                                                                                                                                                                                                                                                              |   |                                                  |   |  |   |  |   |                                                  |   |  |                                                                                                                                                                                                                                                                            |   |                                                 |   |  |   |  |   |                                                 |   |  |                                                                                                                                                                                                                                                                                                  |   |                                                           |   |  |   |  |   |                                                             |   |  |                                                                                                                                                                                                                                                                       |   |                                             |   |  |   |  |   |                                                |   |  |
| 5                                                                                                                                                                          | This ethical standard is very easy to understand                                                                                                                                                                                                                             |   |                                               |   |  |   |  |   |                                                     |   |  |                                                                                                                                                                                                                                                                              |   |                                                  |   |  |   |  |   |                                                  |   |  |                                                                                                                                                                                                                                                                            |   |                                                 |   |  |   |  |   |                                                 |   |  |                                                                                                                                                                                                                                                                                                  |   |                                                           |   |  |   |  |   |                                                             |   |  |                                                                                                                                                                                                                                                                       |   |                                             |   |  |   |  |   |                                                |   |  |
| 4                                                                                                                                                                          |                                                                                                                                                                                                                                                                              |   |                                               |   |  |   |  |   |                                                     |   |  |                                                                                                                                                                                                                                                                              |   |                                                  |   |  |   |  |   |                                                  |   |  |                                                                                                                                                                                                                                                                            |   |                                                 |   |  |   |  |   |                                                 |   |  |                                                                                                                                                                                                                                                                                                  |   |                                                           |   |  |   |  |   |                                                             |   |  |                                                                                                                                                                                                                                                                       |   |                                             |   |  |   |  |   |                                                |   |  |
| 3                                                                                                                                                                          |                                                                                                                                                                                                                                                                              |   |                                               |   |  |   |  |   |                                                     |   |  |                                                                                                                                                                                                                                                                              |   |                                                  |   |  |   |  |   |                                                  |   |  |                                                                                                                                                                                                                                                                            |   |                                                 |   |  |   |  |   |                                                 |   |  |                                                                                                                                                                                                                                                                                                  |   |                                                           |   |  |   |  |   |                                                             |   |  |                                                                                                                                                                                                                                                                       |   |                                             |   |  |   |  |   |                                                |   |  |
| 2                                                                                                                                                                          | This ethical standard is very hard to understand                                                                                                                                                                                                                             |   |                                               |   |  |   |  |   |                                                     |   |  |                                                                                                                                                                                                                                                                              |   |                                                  |   |  |   |  |   |                                                  |   |  |                                                                                                                                                                                                                                                                            |   |                                                 |   |  |   |  |   |                                                 |   |  |                                                                                                                                                                                                                                                                                                  |   |                                                           |   |  |   |  |   |                                                             |   |  |                                                                                                                                                                                                                                                                       |   |                                             |   |  |   |  |   |                                                |   |  |
| 1                                                                                                                                                                          |                                                                                                                                                                                                                                                                              |   |                                               |   |  |   |  |   |                                                     |   |  |                                                                                                                                                                                                                                                                              |   |                                                  |   |  |   |  |   |                                                  |   |  |                                                                                                                                                                                                                                                                            |   |                                                 |   |  |   |  |   |                                                 |   |  |                                                                                                                                                                                                                                                                                                  |   |                                                           |   |  |   |  |   |                                                             |   |  |                                                                                                                                                                                                                                                                       |   |                                             |   |  |   |  |   |                                                |   |  |
| 5                                                                                                                                                                          | This ethical standard is very easy to implement                                                                                                                                                                                                                              |   |                                               |   |  |   |  |   |                                                     |   |  |                                                                                                                                                                                                                                                                              |   |                                                  |   |  |   |  |   |                                                  |   |  |                                                                                                                                                                                                                                                                            |   |                                                 |   |  |   |  |   |                                                 |   |  |                                                                                                                                                                                                                                                                                                  |   |                                                           |   |  |   |  |   |                                                             |   |  |                                                                                                                                                                                                                                                                       |   |                                             |   |  |   |  |   |                                                |   |  |
| 4                                                                                                                                                                          |                                                                                                                                                                                                                                                                              |   |                                               |   |  |   |  |   |                                                     |   |  |                                                                                                                                                                                                                                                                              |   |                                                  |   |  |   |  |   |                                                  |   |  |                                                                                                                                                                                                                                                                            |   |                                                 |   |  |   |  |   |                                                 |   |  |                                                                                                                                                                                                                                                                                                  |   |                                                           |   |  |   |  |   |                                                             |   |  |                                                                                                                                                                                                                                                                       |   |                                             |   |  |   |  |   |                                                |   |  |
| 3                                                                                                                                                                          |                                                                                                                                                                                                                                                                              |   |                                               |   |  |   |  |   |                                                     |   |  |                                                                                                                                                                                                                                                                              |   |                                                  |   |  |   |  |   |                                                  |   |  |                                                                                                                                                                                                                                                                            |   |                                                 |   |  |   |  |   |                                                 |   |  |                                                                                                                                                                                                                                                                                                  |   |                                                           |   |  |   |  |   |                                                             |   |  |                                                                                                                                                                                                                                                                       |   |                                             |   |  |   |  |   |                                                |   |  |
| 2                                                                                                                                                                          | This ethical standard is very hard to implement                                                                                                                                                                                                                              |   |                                               |   |  |   |  |   |                                                     |   |  |                                                                                                                                                                                                                                                                              |   |                                                  |   |  |   |  |   |                                                  |   |  |                                                                                                                                                                                                                                                                            |   |                                                 |   |  |   |  |   |                                                 |   |  |                                                                                                                                                                                                                                                                                                  |   |                                                           |   |  |   |  |   |                                                             |   |  |                                                                                                                                                                                                                                                                       |   |                                             |   |  |   |  |   |                                                |   |  |
| 1                                                                                                                                                                          |                                                                                                                                                                                                                                                                              |   |                                               |   |  |   |  |   |                                                     |   |  |                                                                                                                                                                                                                                                                              |   |                                                  |   |  |   |  |   |                                                  |   |  |                                                                                                                                                                                                                                                                            |   |                                                 |   |  |   |  |   |                                                 |   |  |                                                                                                                                                                                                                                                                                                  |   |                                                           |   |  |   |  |   |                                                             |   |  |                                                                                                                                                                                                                                                                       |   |                                             |   |  |   |  |   |                                                |   |  |
| 5                                                                                                                                                                          | This ethical standard greatly protects trial participants                                                                                                                                                                                                                    |   |                                               |   |  |   |  |   |                                                     |   |  |                                                                                                                                                                                                                                                                              |   |                                                  |   |  |   |  |   |                                                  |   |  |                                                                                                                                                                                                                                                                            |   |                                                 |   |  |   |  |   |                                                 |   |  |                                                                                                                                                                                                                                                                                                  |   |                                                           |   |  |   |  |   |                                                             |   |  |                                                                                                                                                                                                                                                                       |   |                                             |   |  |   |  |   |                                                |   |  |
| 4                                                                                                                                                                          |                                                                                                                                                                                                                                                                              |   |                                               |   |  |   |  |   |                                                     |   |  |                                                                                                                                                                                                                                                                              |   |                                                  |   |  |   |  |   |                                                  |   |  |                                                                                                                                                                                                                                                                            |   |                                                 |   |  |   |  |   |                                                 |   |  |                                                                                                                                                                                                                                                                                                  |   |                                                           |   |  |   |  |   |                                                             |   |  |                                                                                                                                                                                                                                                                       |   |                                             |   |  |   |  |   |                                                |   |  |
| 3                                                                                                                                                                          |                                                                                                                                                                                                                                                                              |   |                                               |   |  |   |  |   |                                                     |   |  |                                                                                                                                                                                                                                                                              |   |                                                  |   |  |   |  |   |                                                  |   |  |                                                                                                                                                                                                                                                                            |   |                                                 |   |  |   |  |   |                                                 |   |  |                                                                                                                                                                                                                                                                                                  |   |                                                           |   |  |   |  |   |                                                             |   |  |                                                                                                                                                                                                                                                                       |   |                                             |   |  |   |  |   |                                                |   |  |
| 2                                                                                                                                                                          | This ethical standard minimally protects trial participants                                                                                                                                                                                                                  |   |                                               |   |  |   |  |   |                                                     |   |  |                                                                                                                                                                                                                                                                              |   |                                                  |   |  |   |  |   |                                                  |   |  |                                                                                                                                                                                                                                                                            |   |                                                 |   |  |   |  |   |                                                 |   |  |                                                                                                                                                                                                                                                                                                  |   |                                                           |   |  |   |  |   |                                                             |   |  |                                                                                                                                                                                                                                                                       |   |                                             |   |  |   |  |   |                                                |   |  |
| 1                                                                                                                                                                          |                                                                                                                                                                                                                                                                              |   |                                               |   |  |   |  |   |                                                     |   |  |                                                                                                                                                                                                                                                                              |   |                                                  |   |  |   |  |   |                                                  |   |  |                                                                                                                                                                                                                                                                            |   |                                                 |   |  |   |  |   |                                                 |   |  |                                                                                                                                                                                                                                                                                                  |   |                                                           |   |  |   |  |   |                                                             |   |  |                                                                                                                                                                                                                                                                       |   |                                             |   |  |   |  |   |                                                |   |  |
| 5                                                                                                                                                                          | I strongly agree with this ethical standard                                                                                                                                                                                                                                  |   |                                               |   |  |   |  |   |                                                     |   |  |                                                                                                                                                                                                                                                                              |   |                                                  |   |  |   |  |   |                                                  |   |  |                                                                                                                                                                                                                                                                            |   |                                                 |   |  |   |  |   |                                                 |   |  |                                                                                                                                                                                                                                                                                                  |   |                                                           |   |  |   |  |   |                                                             |   |  |                                                                                                                                                                                                                                                                       |   |                                             |   |  |   |  |   |                                                |   |  |
| 4                                                                                                                                                                          |                                                                                                                                                                                                                                                                              |   |                                               |   |  |   |  |   |                                                     |   |  |                                                                                                                                                                                                                                                                              |   |                                                  |   |  |   |  |   |                                                  |   |  |                                                                                                                                                                                                                                                                            |   |                                                 |   |  |   |  |   |                                                 |   |  |                                                                                                                                                                                                                                                                                                  |   |                                                           |   |  |   |  |   |                                                             |   |  |                                                                                                                                                                                                                                                                       |   |                                             |   |  |   |  |   |                                                |   |  |
| 3                                                                                                                                                                          |                                                                                                                                                                                                                                                                              |   |                                               |   |  |   |  |   |                                                     |   |  |                                                                                                                                                                                                                                                                              |   |                                                  |   |  |   |  |   |                                                  |   |  |                                                                                                                                                                                                                                                                            |   |                                                 |   |  |   |  |   |                                                 |   |  |                                                                                                                                                                                                                                                                                                  |   |                                                           |   |  |   |  |   |                                                             |   |  |                                                                                                                                                                                                                                                                       |   |                                             |   |  |   |  |   |                                                |   |  |
| 2                                                                                                                                                                          | I strongly disagree with this ethical standard                                                                                                                                                                                                                               |   |                                               |   |  |   |  |   |                                                     |   |  |                                                                                                                                                                                                                                                                              |   |                                                  |   |  |   |  |   |                                                  |   |  |                                                                                                                                                                                                                                                                            |   |                                                 |   |  |   |  |   |                                                 |   |  |                                                                                                                                                                                                                                                                                                  |   |                                                           |   |  |   |  |   |                                                             |   |  |                                                                                                                                                                                                                                                                       |   |                                             |   |  |   |  |   |                                                |   |  |
| 1                                                                                                                                                                          |                                                                                                                                                                                                                                                                              |   |                                               |   |  |   |  |   |                                                     |   |  |                                                                                                                                                                                                                                                                              |   |                                                  |   |  |   |  |   |                                                  |   |  |                                                                                                                                                                                                                                                                            |   |                                                 |   |  |   |  |   |                                                 |   |  |                                                                                                                                                                                                                                                                                                  |   |                                                           |   |  |   |  |   |                                                             |   |  |                                                                                                                                                                                                                                                                       |   |                                             |   |  |   |  |   |                                                |   |  |
| 13. Communities should be meaningfully involved in determining the type, scope, and duration of treatment and care that will be available to participants and communities. | <table border="1"> <tr><td>5</td><td>I am very familiar with this ethical standard</td></tr> <tr><td>4</td><td></td></tr> <tr><td>3</td><td></td></tr> <tr><td>2</td><td>I am not at all familiar with this ethical standard</td></tr> <tr><td>1</td><td></td></tr> </table> | 5 | I am very familiar with this ethical standard | 4 |  | 3 |  | 2 | I am not at all familiar with this ethical standard | 1 |  | <table border="1"> <tr><td>5</td><td>This ethical standard is very easy to understand</td></tr> <tr><td>4</td><td></td></tr> <tr><td>3</td><td></td></tr> <tr><td>2</td><td>This ethical standard is very hard to understand</td></tr> <tr><td>1</td><td></td></tr> </table> | 5 | This ethical standard is very easy to understand | 4 |  | 3 |  | 2 | This ethical standard is very hard to understand | 1 |  | <table border="1"> <tr><td>5</td><td>This ethical standard is very easy to implement</td></tr> <tr><td>4</td><td></td></tr> <tr><td>3</td><td></td></tr> <tr><td>2</td><td>This ethical standard is very hard to implement</td></tr> <tr><td>1</td><td></td></tr> </table> | 5 | This ethical standard is very easy to implement | 4 |  | 3 |  | 2 | This ethical standard is very hard to implement | 1 |  | <table border="1"> <tr><td>5</td><td>This ethical standard greatly protects trial participants</td></tr> <tr><td>4</td><td></td></tr> <tr><td>3</td><td></td></tr> <tr><td>2</td><td>This ethical standard minimally protects trial participants</td></tr> <tr><td>1</td><td></td></tr> </table> | 5 | This ethical standard greatly protects trial participants | 4 |  | 3 |  | 2 | This ethical standard minimally protects trial participants | 1 |  | <table border="1"> <tr><td>5</td><td>I strongly agree with this ethical standard</td></tr> <tr><td>4</td><td></td></tr> <tr><td>3</td><td></td></tr> <tr><td>2</td><td>I strongly disagree with this ethical standard</td></tr> <tr><td>1</td><td></td></tr> </table> | 5 | I strongly agree with this ethical standard | 4 |  | 3 |  | 2 | I strongly disagree with this ethical standard | 1 |  |
| 5                                                                                                                                                                          | I am very familiar with this ethical standard                                                                                                                                                                                                                                |   |                                               |   |  |   |  |   |                                                     |   |  |                                                                                                                                                                                                                                                                              |   |                                                  |   |  |   |  |   |                                                  |   |  |                                                                                                                                                                                                                                                                            |   |                                                 |   |  |   |  |   |                                                 |   |  |                                                                                                                                                                                                                                                                                                  |   |                                                           |   |  |   |  |   |                                                             |   |  |                                                                                                                                                                                                                                                                       |   |                                             |   |  |   |  |   |                                                |   |  |
| 4                                                                                                                                                                          |                                                                                                                                                                                                                                                                              |   |                                               |   |  |   |  |   |                                                     |   |  |                                                                                                                                                                                                                                                                              |   |                                                  |   |  |   |  |   |                                                  |   |  |                                                                                                                                                                                                                                                                            |   |                                                 |   |  |   |  |   |                                                 |   |  |                                                                                                                                                                                                                                                                                                  |   |                                                           |   |  |   |  |   |                                                             |   |  |                                                                                                                                                                                                                                                                       |   |                                             |   |  |   |  |   |                                                |   |  |
| 3                                                                                                                                                                          |                                                                                                                                                                                                                                                                              |   |                                               |   |  |   |  |   |                                                     |   |  |                                                                                                                                                                                                                                                                              |   |                                                  |   |  |   |  |   |                                                  |   |  |                                                                                                                                                                                                                                                                            |   |                                                 |   |  |   |  |   |                                                 |   |  |                                                                                                                                                                                                                                                                                                  |   |                                                           |   |  |   |  |   |                                                             |   |  |                                                                                                                                                                                                                                                                       |   |                                             |   |  |   |  |   |                                                |   |  |
| 2                                                                                                                                                                          | I am not at all familiar with this ethical standard                                                                                                                                                                                                                          |   |                                               |   |  |   |  |   |                                                     |   |  |                                                                                                                                                                                                                                                                              |   |                                                  |   |  |   |  |   |                                                  |   |  |                                                                                                                                                                                                                                                                            |   |                                                 |   |  |   |  |   |                                                 |   |  |                                                                                                                                                                                                                                                                                                  |   |                                                           |   |  |   |  |   |                                                             |   |  |                                                                                                                                                                                                                                                                       |   |                                             |   |  |   |  |   |                                                |   |  |
| 1                                                                                                                                                                          |                                                                                                                                                                                                                                                                              |   |                                               |   |  |   |  |   |                                                     |   |  |                                                                                                                                                                                                                                                                              |   |                                                  |   |  |   |  |   |                                                  |   |  |                                                                                                                                                                                                                                                                            |   |                                                 |   |  |   |  |   |                                                 |   |  |                                                                                                                                                                                                                                                                                                  |   |                                                           |   |  |   |  |   |                                                             |   |  |                                                                                                                                                                                                                                                                       |   |                                             |   |  |   |  |   |                                                |   |  |
| 5                                                                                                                                                                          | This ethical standard is very easy to understand                                                                                                                                                                                                                             |   |                                               |   |  |   |  |   |                                                     |   |  |                                                                                                                                                                                                                                                                              |   |                                                  |   |  |   |  |   |                                                  |   |  |                                                                                                                                                                                                                                                                            |   |                                                 |   |  |   |  |   |                                                 |   |  |                                                                                                                                                                                                                                                                                                  |   |                                                           |   |  |   |  |   |                                                             |   |  |                                                                                                                                                                                                                                                                       |   |                                             |   |  |   |  |   |                                                |   |  |
| 4                                                                                                                                                                          |                                                                                                                                                                                                                                                                              |   |                                               |   |  |   |  |   |                                                     |   |  |                                                                                                                                                                                                                                                                              |   |                                                  |   |  |   |  |   |                                                  |   |  |                                                                                                                                                                                                                                                                            |   |                                                 |   |  |   |  |   |                                                 |   |  |                                                                                                                                                                                                                                                                                                  |   |                                                           |   |  |   |  |   |                                                             |   |  |                                                                                                                                                                                                                                                                       |   |                                             |   |  |   |  |   |                                                |   |  |
| 3                                                                                                                                                                          |                                                                                                                                                                                                                                                                              |   |                                               |   |  |   |  |   |                                                     |   |  |                                                                                                                                                                                                                                                                              |   |                                                  |   |  |   |  |   |                                                  |   |  |                                                                                                                                                                                                                                                                            |   |                                                 |   |  |   |  |   |                                                 |   |  |                                                                                                                                                                                                                                                                                                  |   |                                                           |   |  |   |  |   |                                                             |   |  |                                                                                                                                                                                                                                                                       |   |                                             |   |  |   |  |   |                                                |   |  |
| 2                                                                                                                                                                          | This ethical standard is very hard to understand                                                                                                                                                                                                                             |   |                                               |   |  |   |  |   |                                                     |   |  |                                                                                                                                                                                                                                                                              |   |                                                  |   |  |   |  |   |                                                  |   |  |                                                                                                                                                                                                                                                                            |   |                                                 |   |  |   |  |   |                                                 |   |  |                                                                                                                                                                                                                                                                                                  |   |                                                           |   |  |   |  |   |                                                             |   |  |                                                                                                                                                                                                                                                                       |   |                                             |   |  |   |  |   |                                                |   |  |
| 1                                                                                                                                                                          |                                                                                                                                                                                                                                                                              |   |                                               |   |  |   |  |   |                                                     |   |  |                                                                                                                                                                                                                                                                              |   |                                                  |   |  |   |  |   |                                                  |   |  |                                                                                                                                                                                                                                                                            |   |                                                 |   |  |   |  |   |                                                 |   |  |                                                                                                                                                                                                                                                                                                  |   |                                                           |   |  |   |  |   |                                                             |   |  |                                                                                                                                                                                                                                                                       |   |                                             |   |  |   |  |   |                                                |   |  |
| 5                                                                                                                                                                          | This ethical standard is very easy to implement                                                                                                                                                                                                                              |   |                                               |   |  |   |  |   |                                                     |   |  |                                                                                                                                                                                                                                                                              |   |                                                  |   |  |   |  |   |                                                  |   |  |                                                                                                                                                                                                                                                                            |   |                                                 |   |  |   |  |   |                                                 |   |  |                                                                                                                                                                                                                                                                                                  |   |                                                           |   |  |   |  |   |                                                             |   |  |                                                                                                                                                                                                                                                                       |   |                                             |   |  |   |  |   |                                                |   |  |
| 4                                                                                                                                                                          |                                                                                                                                                                                                                                                                              |   |                                               |   |  |   |  |   |                                                     |   |  |                                                                                                                                                                                                                                                                              |   |                                                  |   |  |   |  |   |                                                  |   |  |                                                                                                                                                                                                                                                                            |   |                                                 |   |  |   |  |   |                                                 |   |  |                                                                                                                                                                                                                                                                                                  |   |                                                           |   |  |   |  |   |                                                             |   |  |                                                                                                                                                                                                                                                                       |   |                                             |   |  |   |  |   |                                                |   |  |
| 3                                                                                                                                                                          |                                                                                                                                                                                                                                                                              |   |                                               |   |  |   |  |   |                                                     |   |  |                                                                                                                                                                                                                                                                              |   |                                                  |   |  |   |  |   |                                                  |   |  |                                                                                                                                                                                                                                                                            |   |                                                 |   |  |   |  |   |                                                 |   |  |                                                                                                                                                                                                                                                                                                  |   |                                                           |   |  |   |  |   |                                                             |   |  |                                                                                                                                                                                                                                                                       |   |                                             |   |  |   |  |   |                                                |   |  |
| 2                                                                                                                                                                          | This ethical standard is very hard to implement                                                                                                                                                                                                                              |   |                                               |   |  |   |  |   |                                                     |   |  |                                                                                                                                                                                                                                                                              |   |                                                  |   |  |   |  |   |                                                  |   |  |                                                                                                                                                                                                                                                                            |   |                                                 |   |  |   |  |   |                                                 |   |  |                                                                                                                                                                                                                                                                                                  |   |                                                           |   |  |   |  |   |                                                             |   |  |                                                                                                                                                                                                                                                                       |   |                                             |   |  |   |  |   |                                                |   |  |
| 1                                                                                                                                                                          |                                                                                                                                                                                                                                                                              |   |                                               |   |  |   |  |   |                                                     |   |  |                                                                                                                                                                                                                                                                              |   |                                                  |   |  |   |  |   |                                                  |   |  |                                                                                                                                                                                                                                                                            |   |                                                 |   |  |   |  |   |                                                 |   |  |                                                                                                                                                                                                                                                                                                  |   |                                                           |   |  |   |  |   |                                                             |   |  |                                                                                                                                                                                                                                                                       |   |                                             |   |  |   |  |   |                                                |   |  |
| 5                                                                                                                                                                          | This ethical standard greatly protects trial participants                                                                                                                                                                                                                    |   |                                               |   |  |   |  |   |                                                     |   |  |                                                                                                                                                                                                                                                                              |   |                                                  |   |  |   |  |   |                                                  |   |  |                                                                                                                                                                                                                                                                            |   |                                                 |   |  |   |  |   |                                                 |   |  |                                                                                                                                                                                                                                                                                                  |   |                                                           |   |  |   |  |   |                                                             |   |  |                                                                                                                                                                                                                                                                       |   |                                             |   |  |   |  |   |                                                |   |  |
| 4                                                                                                                                                                          |                                                                                                                                                                                                                                                                              |   |                                               |   |  |   |  |   |                                                     |   |  |                                                                                                                                                                                                                                                                              |   |                                                  |   |  |   |  |   |                                                  |   |  |                                                                                                                                                                                                                                                                            |   |                                                 |   |  |   |  |   |                                                 |   |  |                                                                                                                                                                                                                                                                                                  |   |                                                           |   |  |   |  |   |                                                             |   |  |                                                                                                                                                                                                                                                                       |   |                                             |   |  |   |  |   |                                                |   |  |
| 3                                                                                                                                                                          |                                                                                                                                                                                                                                                                              |   |                                               |   |  |   |  |   |                                                     |   |  |                                                                                                                                                                                                                                                                              |   |                                                  |   |  |   |  |   |                                                  |   |  |                                                                                                                                                                                                                                                                            |   |                                                 |   |  |   |  |   |                                                 |   |  |                                                                                                                                                                                                                                                                                                  |   |                                                           |   |  |   |  |   |                                                             |   |  |                                                                                                                                                                                                                                                                       |   |                                             |   |  |   |  |   |                                                |   |  |
| 2                                                                                                                                                                          | This ethical standard minimally protects trial participants                                                                                                                                                                                                                  |   |                                               |   |  |   |  |   |                                                     |   |  |                                                                                                                                                                                                                                                                              |   |                                                  |   |  |   |  |   |                                                  |   |  |                                                                                                                                                                                                                                                                            |   |                                                 |   |  |   |  |   |                                                 |   |  |                                                                                                                                                                                                                                                                                                  |   |                                                           |   |  |   |  |   |                                                             |   |  |                                                                                                                                                                                                                                                                       |   |                                             |   |  |   |  |   |                                                |   |  |
| 1                                                                                                                                                                          |                                                                                                                                                                                                                                                                              |   |                                               |   |  |   |  |   |                                                     |   |  |                                                                                                                                                                                                                                                                              |   |                                                  |   |  |   |  |   |                                                  |   |  |                                                                                                                                                                                                                                                                            |   |                                                 |   |  |   |  |   |                                                 |   |  |                                                                                                                                                                                                                                                                                                  |   |                                                           |   |  |   |  |   |                                                             |   |  |                                                                                                                                                                                                                                                                       |   |                                             |   |  |   |  |   |                                                |   |  |
| 5                                                                                                                                                                          | I strongly agree with this ethical standard                                                                                                                                                                                                                                  |   |                                               |   |  |   |  |   |                                                     |   |  |                                                                                                                                                                                                                                                                              |   |                                                  |   |  |   |  |   |                                                  |   |  |                                                                                                                                                                                                                                                                            |   |                                                 |   |  |   |  |   |                                                 |   |  |                                                                                                                                                                                                                                                                                                  |   |                                                           |   |  |   |  |   |                                                             |   |  |                                                                                                                                                                                                                                                                       |   |                                             |   |  |   |  |   |                                                |   |  |
| 4                                                                                                                                                                          |                                                                                                                                                                                                                                                                              |   |                                               |   |  |   |  |   |                                                     |   |  |                                                                                                                                                                                                                                                                              |   |                                                  |   |  |   |  |   |                                                  |   |  |                                                                                                                                                                                                                                                                            |   |                                                 |   |  |   |  |   |                                                 |   |  |                                                                                                                                                                                                                                                                                                  |   |                                                           |   |  |   |  |   |                                                             |   |  |                                                                                                                                                                                                                                                                       |   |                                             |   |  |   |  |   |                                                |   |  |
| 3                                                                                                                                                                          |                                                                                                                                                                                                                                                                              |   |                                               |   |  |   |  |   |                                                     |   |  |                                                                                                                                                                                                                                                                              |   |                                                  |   |  |   |  |   |                                                  |   |  |                                                                                                                                                                                                                                                                            |   |                                                 |   |  |   |  |   |                                                 |   |  |                                                                                                                                                                                                                                                                                                  |   |                                                           |   |  |   |  |   |                                                             |   |  |                                                                                                                                                                                                                                                                       |   |                                             |   |  |   |  |   |                                                |   |  |
| 2                                                                                                                                                                          | I strongly disagree with this ethical standard                                                                                                                                                                                                                               |   |                                               |   |  |   |  |   |                                                     |   |  |                                                                                                                                                                                                                                                                              |   |                                                  |   |  |   |  |   |                                                  |   |  |                                                                                                                                                                                                                                                                            |   |                                                 |   |  |   |  |   |                                                 |   |  |                                                                                                                                                                                                                                                                                                  |   |                                                           |   |  |   |  |   |                                                             |   |  |                                                                                                                                                                                                                                                                       |   |                                             |   |  |   |  |   |                                                |   |  |
| 1                                                                                                                                                                          |                                                                                                                                                                                                                                                                              |   |                                               |   |  |   |  |   |                                                     |   |  |                                                                                                                                                                                                                                                                              |   |                                                  |   |  |   |  |   |                                                  |   |  |                                                                                                                                                                                                                                                                            |   |                                                 |   |  |   |  |   |                                                 |   |  |                                                                                                                                                                                                                                                                                                  |   |                                                           |   |  |   |  |   |                                                             |   |  |                                                                                                                                                                                                                                                                       |   |                                             |   |  |   |  |   |                                                |   |  |
| 14. Agreements on who will finance, deliver and monitor care and treatment should be documented.                                                                           | <table border="1"> <tr><td>5</td><td>I am very familiar with this ethical standard</td></tr> <tr><td>4</td><td></td></tr> <tr><td>3</td><td></td></tr> <tr><td>2</td><td>I am not at all familiar with this ethical standard</td></tr> <tr><td>1</td><td></td></tr> </table> | 5 | I am very familiar with this ethical standard | 4 |  | 3 |  | 2 | I am not at all familiar with this ethical standard | 1 |  | <table border="1"> <tr><td>5</td><td>This ethical standard is very easy to understand</td></tr> <tr><td>4</td><td></td></tr> <tr><td>3</td><td></td></tr> <tr><td>2</td><td>This ethical standard is very hard to understand</td></tr> <tr><td>1</td><td></td></tr> </table> | 5 | This ethical standard is very easy to understand | 4 |  | 3 |  | 2 | This ethical standard is very hard to understand | 1 |  | <table border="1"> <tr><td>5</td><td>This ethical standard is very easy to implement</td></tr> <tr><td>4</td><td></td></tr> <tr><td>3</td><td></td></tr> <tr><td>2</td><td>This ethical standard is very hard to implement</td></tr> <tr><td>1</td><td></td></tr> </table> | 5 | This ethical standard is very easy to implement | 4 |  | 3 |  | 2 | This ethical standard is very hard to implement | 1 |  | <table border="1"> <tr><td>5</td><td>This ethical standard greatly protects trial participants</td></tr> <tr><td>4</td><td></td></tr> <tr><td>3</td><td></td></tr> <tr><td>2</td><td>This ethical standard minimally protects trial participants</td></tr> <tr><td>1</td><td></td></tr> </table> | 5 | This ethical standard greatly protects trial participants | 4 |  | 3 |  | 2 | This ethical standard minimally protects trial participants | 1 |  | <table border="1"> <tr><td>5</td><td>I strongly agree with this ethical standard</td></tr> <tr><td>4</td><td></td></tr> <tr><td>3</td><td></td></tr> <tr><td>2</td><td>I strongly disagree with this ethical standard</td></tr> <tr><td>1</td><td></td></tr> </table> | 5 | I strongly agree with this ethical standard | 4 |  | 3 |  | 2 | I strongly disagree with this ethical standard | 1 |  |
| 5                                                                                                                                                                          | I am very familiar with this ethical standard                                                                                                                                                                                                                                |   |                                               |   |  |   |  |   |                                                     |   |  |                                                                                                                                                                                                                                                                              |   |                                                  |   |  |   |  |   |                                                  |   |  |                                                                                                                                                                                                                                                                            |   |                                                 |   |  |   |  |   |                                                 |   |  |                                                                                                                                                                                                                                                                                                  |   |                                                           |   |  |   |  |   |                                                             |   |  |                                                                                                                                                                                                                                                                       |   |                                             |   |  |   |  |   |                                                |   |  |
| 4                                                                                                                                                                          |                                                                                                                                                                                                                                                                              |   |                                               |   |  |   |  |   |                                                     |   |  |                                                                                                                                                                                                                                                                              |   |                                                  |   |  |   |  |   |                                                  |   |  |                                                                                                                                                                                                                                                                            |   |                                                 |   |  |   |  |   |                                                 |   |  |                                                                                                                                                                                                                                                                                                  |   |                                                           |   |  |   |  |   |                                                             |   |  |                                                                                                                                                                                                                                                                       |   |                                             |   |  |   |  |   |                                                |   |  |
| 3                                                                                                                                                                          |                                                                                                                                                                                                                                                                              |   |                                               |   |  |   |  |   |                                                     |   |  |                                                                                                                                                                                                                                                                              |   |                                                  |   |  |   |  |   |                                                  |   |  |                                                                                                                                                                                                                                                                            |   |                                                 |   |  |   |  |   |                                                 |   |  |                                                                                                                                                                                                                                                                                                  |   |                                                           |   |  |   |  |   |                                                             |   |  |                                                                                                                                                                                                                                                                       |   |                                             |   |  |   |  |   |                                                |   |  |
| 2                                                                                                                                                                          | I am not at all familiar with this ethical standard                                                                                                                                                                                                                          |   |                                               |   |  |   |  |   |                                                     |   |  |                                                                                                                                                                                                                                                                              |   |                                                  |   |  |   |  |   |                                                  |   |  |                                                                                                                                                                                                                                                                            |   |                                                 |   |  |   |  |   |                                                 |   |  |                                                                                                                                                                                                                                                                                                  |   |                                                           |   |  |   |  |   |                                                             |   |  |                                                                                                                                                                                                                                                                       |   |                                             |   |  |   |  |   |                                                |   |  |
| 1                                                                                                                                                                          |                                                                                                                                                                                                                                                                              |   |                                               |   |  |   |  |   |                                                     |   |  |                                                                                                                                                                                                                                                                              |   |                                                  |   |  |   |  |   |                                                  |   |  |                                                                                                                                                                                                                                                                            |   |                                                 |   |  |   |  |   |                                                 |   |  |                                                                                                                                                                                                                                                                                                  |   |                                                           |   |  |   |  |   |                                                             |   |  |                                                                                                                                                                                                                                                                       |   |                                             |   |  |   |  |   |                                                |   |  |
| 5                                                                                                                                                                          | This ethical standard is very easy to understand                                                                                                                                                                                                                             |   |                                               |   |  |   |  |   |                                                     |   |  |                                                                                                                                                                                                                                                                              |   |                                                  |   |  |   |  |   |                                                  |   |  |                                                                                                                                                                                                                                                                            |   |                                                 |   |  |   |  |   |                                                 |   |  |                                                                                                                                                                                                                                                                                                  |   |                                                           |   |  |   |  |   |                                                             |   |  |                                                                                                                                                                                                                                                                       |   |                                             |   |  |   |  |   |                                                |   |  |
| 4                                                                                                                                                                          |                                                                                                                                                                                                                                                                              |   |                                               |   |  |   |  |   |                                                     |   |  |                                                                                                                                                                                                                                                                              |   |                                                  |   |  |   |  |   |                                                  |   |  |                                                                                                                                                                                                                                                                            |   |                                                 |   |  |   |  |   |                                                 |   |  |                                                                                                                                                                                                                                                                                                  |   |                                                           |   |  |   |  |   |                                                             |   |  |                                                                                                                                                                                                                                                                       |   |                                             |   |  |   |  |   |                                                |   |  |
| 3                                                                                                                                                                          |                                                                                                                                                                                                                                                                              |   |                                               |   |  |   |  |   |                                                     |   |  |                                                                                                                                                                                                                                                                              |   |                                                  |   |  |   |  |   |                                                  |   |  |                                                                                                                                                                                                                                                                            |   |                                                 |   |  |   |  |   |                                                 |   |  |                                                                                                                                                                                                                                                                                                  |   |                                                           |   |  |   |  |   |                                                             |   |  |                                                                                                                                                                                                                                                                       |   |                                             |   |  |   |  |   |                                                |   |  |
| 2                                                                                                                                                                          | This ethical standard is very hard to understand                                                                                                                                                                                                                             |   |                                               |   |  |   |  |   |                                                     |   |  |                                                                                                                                                                                                                                                                              |   |                                                  |   |  |   |  |   |                                                  |   |  |                                                                                                                                                                                                                                                                            |   |                                                 |   |  |   |  |   |                                                 |   |  |                                                                                                                                                                                                                                                                                                  |   |                                                           |   |  |   |  |   |                                                             |   |  |                                                                                                                                                                                                                                                                       |   |                                             |   |  |   |  |   |                                                |   |  |
| 1                                                                                                                                                                          |                                                                                                                                                                                                                                                                              |   |                                               |   |  |   |  |   |                                                     |   |  |                                                                                                                                                                                                                                                                              |   |                                                  |   |  |   |  |   |                                                  |   |  |                                                                                                                                                                                                                                                                            |   |                                                 |   |  |   |  |   |                                                 |   |  |                                                                                                                                                                                                                                                                                                  |   |                                                           |   |  |   |  |   |                                                             |   |  |                                                                                                                                                                                                                                                                       |   |                                             |   |  |   |  |   |                                                |   |  |
| 5                                                                                                                                                                          | This ethical standard is very easy to implement                                                                                                                                                                                                                              |   |                                               |   |  |   |  |   |                                                     |   |  |                                                                                                                                                                                                                                                                              |   |                                                  |   |  |   |  |   |                                                  |   |  |                                                                                                                                                                                                                                                                            |   |                                                 |   |  |   |  |   |                                                 |   |  |                                                                                                                                                                                                                                                                                                  |   |                                                           |   |  |   |  |   |                                                             |   |  |                                                                                                                                                                                                                                                                       |   |                                             |   |  |   |  |   |                                                |   |  |
| 4                                                                                                                                                                          |                                                                                                                                                                                                                                                                              |   |                                               |   |  |   |  |   |                                                     |   |  |                                                                                                                                                                                                                                                                              |   |                                                  |   |  |   |  |   |                                                  |   |  |                                                                                                                                                                                                                                                                            |   |                                                 |   |  |   |  |   |                                                 |   |  |                                                                                                                                                                                                                                                                                                  |   |                                                           |   |  |   |  |   |                                                             |   |  |                                                                                                                                                                                                                                                                       |   |                                             |   |  |   |  |   |                                                |   |  |
| 3                                                                                                                                                                          |                                                                                                                                                                                                                                                                              |   |                                               |   |  |   |  |   |                                                     |   |  |                                                                                                                                                                                                                                                                              |   |                                                  |   |  |   |  |   |                                                  |   |  |                                                                                                                                                                                                                                                                            |   |                                                 |   |  |   |  |   |                                                 |   |  |                                                                                                                                                                                                                                                                                                  |   |                                                           |   |  |   |  |   |                                                             |   |  |                                                                                                                                                                                                                                                                       |   |                                             |   |  |   |  |   |                                                |   |  |
| 2                                                                                                                                                                          | This ethical standard is very hard to implement                                                                                                                                                                                                                              |   |                                               |   |  |   |  |   |                                                     |   |  |                                                                                                                                                                                                                                                                              |   |                                                  |   |  |   |  |   |                                                  |   |  |                                                                                                                                                                                                                                                                            |   |                                                 |   |  |   |  |   |                                                 |   |  |                                                                                                                                                                                                                                                                                                  |   |                                                           |   |  |   |  |   |                                                             |   |  |                                                                                                                                                                                                                                                                       |   |                                             |   |  |   |  |   |                                                |   |  |
| 1                                                                                                                                                                          |                                                                                                                                                                                                                                                                              |   |                                               |   |  |   |  |   |                                                     |   |  |                                                                                                                                                                                                                                                                              |   |                                                  |   |  |   |  |   |                                                  |   |  |                                                                                                                                                                                                                                                                            |   |                                                 |   |  |   |  |   |                                                 |   |  |                                                                                                                                                                                                                                                                                                  |   |                                                           |   |  |   |  |   |                                                             |   |  |                                                                                                                                                                                                                                                                       |   |                                             |   |  |   |  |   |                                                |   |  |
| 5                                                                                                                                                                          | This ethical standard greatly protects trial participants                                                                                                                                                                                                                    |   |                                               |   |  |   |  |   |                                                     |   |  |                                                                                                                                                                                                                                                                              |   |                                                  |   |  |   |  |   |                                                  |   |  |                                                                                                                                                                                                                                                                            |   |                                                 |   |  |   |  |   |                                                 |   |  |                                                                                                                                                                                                                                                                                                  |   |                                                           |   |  |   |  |   |                                                             |   |  |                                                                                                                                                                                                                                                                       |   |                                             |   |  |   |  |   |                                                |   |  |
| 4                                                                                                                                                                          |                                                                                                                                                                                                                                                                              |   |                                               |   |  |   |  |   |                                                     |   |  |                                                                                                                                                                                                                                                                              |   |                                                  |   |  |   |  |   |                                                  |   |  |                                                                                                                                                                                                                                                                            |   |                                                 |   |  |   |  |   |                                                 |   |  |                                                                                                                                                                                                                                                                                                  |   |                                                           |   |  |   |  |   |                                                             |   |  |                                                                                                                                                                                                                                                                       |   |                                             |   |  |   |  |   |                                                |   |  |
| 3                                                                                                                                                                          |                                                                                                                                                                                                                                                                              |   |                                               |   |  |   |  |   |                                                     |   |  |                                                                                                                                                                                                                                                                              |   |                                                  |   |  |   |  |   |                                                  |   |  |                                                                                                                                                                                                                                                                            |   |                                                 |   |  |   |  |   |                                                 |   |  |                                                                                                                                                                                                                                                                                                  |   |                                                           |   |  |   |  |   |                                                             |   |  |                                                                                                                                                                                                                                                                       |   |                                             |   |  |   |  |   |                                                |   |  |
| 2                                                                                                                                                                          | This ethical standard minimally protects trial participants                                                                                                                                                                                                                  |   |                                               |   |  |   |  |   |                                                     |   |  |                                                                                                                                                                                                                                                                              |   |                                                  |   |  |   |  |   |                                                  |   |  |                                                                                                                                                                                                                                                                            |   |                                                 |   |  |   |  |   |                                                 |   |  |                                                                                                                                                                                                                                                                                                  |   |                                                           |   |  |   |  |   |                                                             |   |  |                                                                                                                                                                                                                                                                       |   |                                             |   |  |   |  |   |                                                |   |  |
| 1                                                                                                                                                                          |                                                                                                                                                                                                                                                                              |   |                                               |   |  |   |  |   |                                                     |   |  |                                                                                                                                                                                                                                                                              |   |                                                  |   |  |   |  |   |                                                  |   |  |                                                                                                                                                                                                                                                                            |   |                                                 |   |  |   |  |   |                                                 |   |  |                                                                                                                                                                                                                                                                                                  |   |                                                           |   |  |   |  |   |                                                             |   |  |                                                                                                                                                                                                                                                                       |   |                                             |   |  |   |  |   |                                                |   |  |
| 5                                                                                                                                                                          | I strongly agree with this ethical standard                                                                                                                                                                                                                                  |   |                                               |   |  |   |  |   |                                                     |   |  |                                                                                                                                                                                                                                                                              |   |                                                  |   |  |   |  |   |                                                  |   |  |                                                                                                                                                                                                                                                                            |   |                                                 |   |  |   |  |   |                                                 |   |  |                                                                                                                                                                                                                                                                                                  |   |                                                           |   |  |   |  |   |                                                             |   |  |                                                                                                                                                                                                                                                                       |   |                                             |   |  |   |  |   |                                                |   |  |
| 4                                                                                                                                                                          |                                                                                                                                                                                                                                                                              |   |                                               |   |  |   |  |   |                                                     |   |  |                                                                                                                                                                                                                                                                              |   |                                                  |   |  |   |  |   |                                                  |   |  |                                                                                                                                                                                                                                                                            |   |                                                 |   |  |   |  |   |                                                 |   |  |                                                                                                                                                                                                                                                                                                  |   |                                                           |   |  |   |  |   |                                                             |   |  |                                                                                                                                                                                                                                                                       |   |                                             |   |  |   |  |   |                                                |   |  |
| 3                                                                                                                                                                          |                                                                                                                                                                                                                                                                              |   |                                               |   |  |   |  |   |                                                     |   |  |                                                                                                                                                                                                                                                                              |   |                                                  |   |  |   |  |   |                                                  |   |  |                                                                                                                                                                                                                                                                            |   |                                                 |   |  |   |  |   |                                                 |   |  |                                                                                                                                                                                                                                                                                                  |   |                                                           |   |  |   |  |   |                                                             |   |  |                                                                                                                                                                                                                                                                       |   |                                             |   |  |   |  |   |                                                |   |  |
| 2                                                                                                                                                                          | I strongly disagree with this ethical standard                                                                                                                                                                                                                               |   |                                               |   |  |   |  |   |                                                     |   |  |                                                                                                                                                                                                                                                                              |   |                                                  |   |  |   |  |   |                                                  |   |  |                                                                                                                                                                                                                                                                            |   |                                                 |   |  |   |  |   |                                                 |   |  |                                                                                                                                                                                                                                                                                                  |   |                                                           |   |  |   |  |   |                                                             |   |  |                                                                                                                                                                                                                                                                       |   |                                             |   |  |   |  |   |                                                |   |  |
| 1                                                                                                                                                                          |                                                                                                                                                                                                                                                                              |   |                                               |   |  |   |  |   |                                                     |   |  |                                                                                                                                                                                                                                                                              |   |                                                  |   |  |   |  |   |                                                  |   |  |                                                                                                                                                                                                                                                                            |   |                                                 |   |  |   |  |   |                                                 |   |  |                                                                                                                                                                                                                                                                                                  |   |                                                           |   |  |   |  |   |                                                             |   |  |                                                                                                                                                                                                                                                                       |   |                                             |   |  |   |  |   |                                                |   |  |

|                                                                                                                                          |                                                                                                                                                                                                                                                                              |   |                                               |   |  |   |  |   |                                                     |   |  |                                                                                                                                                                                                                                                                              |   |                                                  |   |  |   |  |   |                                                  |   |  |                                                                                                                                                                                                                                                                            |   |                                                 |   |  |   |  |   |                                                 |   |  |                                                                                                                                                                                                                                                                                                  |   |                                                           |   |  |   |  |   |                                                             |   |  |                                                                                                                                                                                                                                                                       |   |                                             |   |  |   |  |   |                                                |   |  |
|------------------------------------------------------------------------------------------------------------------------------------------|------------------------------------------------------------------------------------------------------------------------------------------------------------------------------------------------------------------------------------------------------------------------------|---|-----------------------------------------------|---|--|---|--|---|-----------------------------------------------------|---|--|------------------------------------------------------------------------------------------------------------------------------------------------------------------------------------------------------------------------------------------------------------------------------|---|--------------------------------------------------|---|--|---|--|---|--------------------------------------------------|---|--|----------------------------------------------------------------------------------------------------------------------------------------------------------------------------------------------------------------------------------------------------------------------------|---|-------------------------------------------------|---|--|---|--|---|-------------------------------------------------|---|--|--------------------------------------------------------------------------------------------------------------------------------------------------------------------------------------------------------------------------------------------------------------------------------------------------|---|-----------------------------------------------------------|---|--|---|--|---|-------------------------------------------------------------|---|--|-----------------------------------------------------------------------------------------------------------------------------------------------------------------------------------------------------------------------------------------------------------------------|---|---------------------------------------------|---|--|---|--|---|------------------------------------------------|---|--|
| 15. Stakeholders should discuss disseminating results about how access to care was implemented in the trial.                             | <table border="1"> <tr><td>5</td><td>I am very familiar with this ethical standard</td></tr> <tr><td>4</td><td></td></tr> <tr><td>3</td><td></td></tr> <tr><td>2</td><td>I am not at all familiar with this ethical standard</td></tr> <tr><td>1</td><td></td></tr> </table> | 5 | I am very familiar with this ethical standard | 4 |  | 3 |  | 2 | I am not at all familiar with this ethical standard | 1 |  | <table border="1"> <tr><td>5</td><td>This ethical standard is very easy to understand</td></tr> <tr><td>4</td><td></td></tr> <tr><td>3</td><td></td></tr> <tr><td>2</td><td>This ethical standard is very hard to understand</td></tr> <tr><td>1</td><td></td></tr> </table> | 5 | This ethical standard is very easy to understand | 4 |  | 3 |  | 2 | This ethical standard is very hard to understand | 1 |  | <table border="1"> <tr><td>5</td><td>This ethical standard is very easy to implement</td></tr> <tr><td>4</td><td></td></tr> <tr><td>3</td><td></td></tr> <tr><td>2</td><td>This ethical standard is very hard to implement</td></tr> <tr><td>1</td><td></td></tr> </table> | 5 | This ethical standard is very easy to implement | 4 |  | 3 |  | 2 | This ethical standard is very hard to implement | 1 |  | <table border="1"> <tr><td>5</td><td>This ethical standard greatly protects trial participants</td></tr> <tr><td>4</td><td></td></tr> <tr><td>3</td><td></td></tr> <tr><td>2</td><td>This ethical standard minimally protects trial participants</td></tr> <tr><td>1</td><td></td></tr> </table> | 5 | This ethical standard greatly protects trial participants | 4 |  | 3 |  | 2 | This ethical standard minimally protects trial participants | 1 |  | <table border="1"> <tr><td>5</td><td>I strongly agree with this ethical standard</td></tr> <tr><td>4</td><td></td></tr> <tr><td>3</td><td></td></tr> <tr><td>2</td><td>I strongly disagree with this ethical standard</td></tr> <tr><td>1</td><td></td></tr> </table> | 5 | I strongly agree with this ethical standard | 4 |  | 3 |  | 2 | I strongly disagree with this ethical standard | 1 |  |
| 5                                                                                                                                        | I am very familiar with this ethical standard                                                                                                                                                                                                                                |   |                                               |   |  |   |  |   |                                                     |   |  |                                                                                                                                                                                                                                                                              |   |                                                  |   |  |   |  |   |                                                  |   |  |                                                                                                                                                                                                                                                                            |   |                                                 |   |  |   |  |   |                                                 |   |  |                                                                                                                                                                                                                                                                                                  |   |                                                           |   |  |   |  |   |                                                             |   |  |                                                                                                                                                                                                                                                                       |   |                                             |   |  |   |  |   |                                                |   |  |
| 4                                                                                                                                        |                                                                                                                                                                                                                                                                              |   |                                               |   |  |   |  |   |                                                     |   |  |                                                                                                                                                                                                                                                                              |   |                                                  |   |  |   |  |   |                                                  |   |  |                                                                                                                                                                                                                                                                            |   |                                                 |   |  |   |  |   |                                                 |   |  |                                                                                                                                                                                                                                                                                                  |   |                                                           |   |  |   |  |   |                                                             |   |  |                                                                                                                                                                                                                                                                       |   |                                             |   |  |   |  |   |                                                |   |  |
| 3                                                                                                                                        |                                                                                                                                                                                                                                                                              |   |                                               |   |  |   |  |   |                                                     |   |  |                                                                                                                                                                                                                                                                              |   |                                                  |   |  |   |  |   |                                                  |   |  |                                                                                                                                                                                                                                                                            |   |                                                 |   |  |   |  |   |                                                 |   |  |                                                                                                                                                                                                                                                                                                  |   |                                                           |   |  |   |  |   |                                                             |   |  |                                                                                                                                                                                                                                                                       |   |                                             |   |  |   |  |   |                                                |   |  |
| 2                                                                                                                                        | I am not at all familiar with this ethical standard                                                                                                                                                                                                                          |   |                                               |   |  |   |  |   |                                                     |   |  |                                                                                                                                                                                                                                                                              |   |                                                  |   |  |   |  |   |                                                  |   |  |                                                                                                                                                                                                                                                                            |   |                                                 |   |  |   |  |   |                                                 |   |  |                                                                                                                                                                                                                                                                                                  |   |                                                           |   |  |   |  |   |                                                             |   |  |                                                                                                                                                                                                                                                                       |   |                                             |   |  |   |  |   |                                                |   |  |
| 1                                                                                                                                        |                                                                                                                                                                                                                                                                              |   |                                               |   |  |   |  |   |                                                     |   |  |                                                                                                                                                                                                                                                                              |   |                                                  |   |  |   |  |   |                                                  |   |  |                                                                                                                                                                                                                                                                            |   |                                                 |   |  |   |  |   |                                                 |   |  |                                                                                                                                                                                                                                                                                                  |   |                                                           |   |  |   |  |   |                                                             |   |  |                                                                                                                                                                                                                                                                       |   |                                             |   |  |   |  |   |                                                |   |  |
| 5                                                                                                                                        | This ethical standard is very easy to understand                                                                                                                                                                                                                             |   |                                               |   |  |   |  |   |                                                     |   |  |                                                                                                                                                                                                                                                                              |   |                                                  |   |  |   |  |   |                                                  |   |  |                                                                                                                                                                                                                                                                            |   |                                                 |   |  |   |  |   |                                                 |   |  |                                                                                                                                                                                                                                                                                                  |   |                                                           |   |  |   |  |   |                                                             |   |  |                                                                                                                                                                                                                                                                       |   |                                             |   |  |   |  |   |                                                |   |  |
| 4                                                                                                                                        |                                                                                                                                                                                                                                                                              |   |                                               |   |  |   |  |   |                                                     |   |  |                                                                                                                                                                                                                                                                              |   |                                                  |   |  |   |  |   |                                                  |   |  |                                                                                                                                                                                                                                                                            |   |                                                 |   |  |   |  |   |                                                 |   |  |                                                                                                                                                                                                                                                                                                  |   |                                                           |   |  |   |  |   |                                                             |   |  |                                                                                                                                                                                                                                                                       |   |                                             |   |  |   |  |   |                                                |   |  |
| 3                                                                                                                                        |                                                                                                                                                                                                                                                                              |   |                                               |   |  |   |  |   |                                                     |   |  |                                                                                                                                                                                                                                                                              |   |                                                  |   |  |   |  |   |                                                  |   |  |                                                                                                                                                                                                                                                                            |   |                                                 |   |  |   |  |   |                                                 |   |  |                                                                                                                                                                                                                                                                                                  |   |                                                           |   |  |   |  |   |                                                             |   |  |                                                                                                                                                                                                                                                                       |   |                                             |   |  |   |  |   |                                                |   |  |
| 2                                                                                                                                        | This ethical standard is very hard to understand                                                                                                                                                                                                                             |   |                                               |   |  |   |  |   |                                                     |   |  |                                                                                                                                                                                                                                                                              |   |                                                  |   |  |   |  |   |                                                  |   |  |                                                                                                                                                                                                                                                                            |   |                                                 |   |  |   |  |   |                                                 |   |  |                                                                                                                                                                                                                                                                                                  |   |                                                           |   |  |   |  |   |                                                             |   |  |                                                                                                                                                                                                                                                                       |   |                                             |   |  |   |  |   |                                                |   |  |
| 1                                                                                                                                        |                                                                                                                                                                                                                                                                              |   |                                               |   |  |   |  |   |                                                     |   |  |                                                                                                                                                                                                                                                                              |   |                                                  |   |  |   |  |   |                                                  |   |  |                                                                                                                                                                                                                                                                            |   |                                                 |   |  |   |  |   |                                                 |   |  |                                                                                                                                                                                                                                                                                                  |   |                                                           |   |  |   |  |   |                                                             |   |  |                                                                                                                                                                                                                                                                       |   |                                             |   |  |   |  |   |                                                |   |  |
| 5                                                                                                                                        | This ethical standard is very easy to implement                                                                                                                                                                                                                              |   |                                               |   |  |   |  |   |                                                     |   |  |                                                                                                                                                                                                                                                                              |   |                                                  |   |  |   |  |   |                                                  |   |  |                                                                                                                                                                                                                                                                            |   |                                                 |   |  |   |  |   |                                                 |   |  |                                                                                                                                                                                                                                                                                                  |   |                                                           |   |  |   |  |   |                                                             |   |  |                                                                                                                                                                                                                                                                       |   |                                             |   |  |   |  |   |                                                |   |  |
| 4                                                                                                                                        |                                                                                                                                                                                                                                                                              |   |                                               |   |  |   |  |   |                                                     |   |  |                                                                                                                                                                                                                                                                              |   |                                                  |   |  |   |  |   |                                                  |   |  |                                                                                                                                                                                                                                                                            |   |                                                 |   |  |   |  |   |                                                 |   |  |                                                                                                                                                                                                                                                                                                  |   |                                                           |   |  |   |  |   |                                                             |   |  |                                                                                                                                                                                                                                                                       |   |                                             |   |  |   |  |   |                                                |   |  |
| 3                                                                                                                                        |                                                                                                                                                                                                                                                                              |   |                                               |   |  |   |  |   |                                                     |   |  |                                                                                                                                                                                                                                                                              |   |                                                  |   |  |   |  |   |                                                  |   |  |                                                                                                                                                                                                                                                                            |   |                                                 |   |  |   |  |   |                                                 |   |  |                                                                                                                                                                                                                                                                                                  |   |                                                           |   |  |   |  |   |                                                             |   |  |                                                                                                                                                                                                                                                                       |   |                                             |   |  |   |  |   |                                                |   |  |
| 2                                                                                                                                        | This ethical standard is very hard to implement                                                                                                                                                                                                                              |   |                                               |   |  |   |  |   |                                                     |   |  |                                                                                                                                                                                                                                                                              |   |                                                  |   |  |   |  |   |                                                  |   |  |                                                                                                                                                                                                                                                                            |   |                                                 |   |  |   |  |   |                                                 |   |  |                                                                                                                                                                                                                                                                                                  |   |                                                           |   |  |   |  |   |                                                             |   |  |                                                                                                                                                                                                                                                                       |   |                                             |   |  |   |  |   |                                                |   |  |
| 1                                                                                                                                        |                                                                                                                                                                                                                                                                              |   |                                               |   |  |   |  |   |                                                     |   |  |                                                                                                                                                                                                                                                                              |   |                                                  |   |  |   |  |   |                                                  |   |  |                                                                                                                                                                                                                                                                            |   |                                                 |   |  |   |  |   |                                                 |   |  |                                                                                                                                                                                                                                                                                                  |   |                                                           |   |  |   |  |   |                                                             |   |  |                                                                                                                                                                                                                                                                       |   |                                             |   |  |   |  |   |                                                |   |  |
| 5                                                                                                                                        | This ethical standard greatly protects trial participants                                                                                                                                                                                                                    |   |                                               |   |  |   |  |   |                                                     |   |  |                                                                                                                                                                                                                                                                              |   |                                                  |   |  |   |  |   |                                                  |   |  |                                                                                                                                                                                                                                                                            |   |                                                 |   |  |   |  |   |                                                 |   |  |                                                                                                                                                                                                                                                                                                  |   |                                                           |   |  |   |  |   |                                                             |   |  |                                                                                                                                                                                                                                                                       |   |                                             |   |  |   |  |   |                                                |   |  |
| 4                                                                                                                                        |                                                                                                                                                                                                                                                                              |   |                                               |   |  |   |  |   |                                                     |   |  |                                                                                                                                                                                                                                                                              |   |                                                  |   |  |   |  |   |                                                  |   |  |                                                                                                                                                                                                                                                                            |   |                                                 |   |  |   |  |   |                                                 |   |  |                                                                                                                                                                                                                                                                                                  |   |                                                           |   |  |   |  |   |                                                             |   |  |                                                                                                                                                                                                                                                                       |   |                                             |   |  |   |  |   |                                                |   |  |
| 3                                                                                                                                        |                                                                                                                                                                                                                                                                              |   |                                               |   |  |   |  |   |                                                     |   |  |                                                                                                                                                                                                                                                                              |   |                                                  |   |  |   |  |   |                                                  |   |  |                                                                                                                                                                                                                                                                            |   |                                                 |   |  |   |  |   |                                                 |   |  |                                                                                                                                                                                                                                                                                                  |   |                                                           |   |  |   |  |   |                                                             |   |  |                                                                                                                                                                                                                                                                       |   |                                             |   |  |   |  |   |                                                |   |  |
| 2                                                                                                                                        | This ethical standard minimally protects trial participants                                                                                                                                                                                                                  |   |                                               |   |  |   |  |   |                                                     |   |  |                                                                                                                                                                                                                                                                              |   |                                                  |   |  |   |  |   |                                                  |   |  |                                                                                                                                                                                                                                                                            |   |                                                 |   |  |   |  |   |                                                 |   |  |                                                                                                                                                                                                                                                                                                  |   |                                                           |   |  |   |  |   |                                                             |   |  |                                                                                                                                                                                                                                                                       |   |                                             |   |  |   |  |   |                                                |   |  |
| 1                                                                                                                                        |                                                                                                                                                                                                                                                                              |   |                                               |   |  |   |  |   |                                                     |   |  |                                                                                                                                                                                                                                                                              |   |                                                  |   |  |   |  |   |                                                  |   |  |                                                                                                                                                                                                                                                                            |   |                                                 |   |  |   |  |   |                                                 |   |  |                                                                                                                                                                                                                                                                                                  |   |                                                           |   |  |   |  |   |                                                             |   |  |                                                                                                                                                                                                                                                                       |   |                                             |   |  |   |  |   |                                                |   |  |
| 5                                                                                                                                        | I strongly agree with this ethical standard                                                                                                                                                                                                                                  |   |                                               |   |  |   |  |   |                                                     |   |  |                                                                                                                                                                                                                                                                              |   |                                                  |   |  |   |  |   |                                                  |   |  |                                                                                                                                                                                                                                                                            |   |                                                 |   |  |   |  |   |                                                 |   |  |                                                                                                                                                                                                                                                                                                  |   |                                                           |   |  |   |  |   |                                                             |   |  |                                                                                                                                                                                                                                                                       |   |                                             |   |  |   |  |   |                                                |   |  |
| 4                                                                                                                                        |                                                                                                                                                                                                                                                                              |   |                                               |   |  |   |  |   |                                                     |   |  |                                                                                                                                                                                                                                                                              |   |                                                  |   |  |   |  |   |                                                  |   |  |                                                                                                                                                                                                                                                                            |   |                                                 |   |  |   |  |   |                                                 |   |  |                                                                                                                                                                                                                                                                                                  |   |                                                           |   |  |   |  |   |                                                             |   |  |                                                                                                                                                                                                                                                                       |   |                                             |   |  |   |  |   |                                                |   |  |
| 3                                                                                                                                        |                                                                                                                                                                                                                                                                              |   |                                               |   |  |   |  |   |                                                     |   |  |                                                                                                                                                                                                                                                                              |   |                                                  |   |  |   |  |   |                                                  |   |  |                                                                                                                                                                                                                                                                            |   |                                                 |   |  |   |  |   |                                                 |   |  |                                                                                                                                                                                                                                                                                                  |   |                                                           |   |  |   |  |   |                                                             |   |  |                                                                                                                                                                                                                                                                       |   |                                             |   |  |   |  |   |                                                |   |  |
| 2                                                                                                                                        | I strongly disagree with this ethical standard                                                                                                                                                                                                                               |   |                                               |   |  |   |  |   |                                                     |   |  |                                                                                                                                                                                                                                                                              |   |                                                  |   |  |   |  |   |                                                  |   |  |                                                                                                                                                                                                                                                                            |   |                                                 |   |  |   |  |   |                                                 |   |  |                                                                                                                                                                                                                                                                                                  |   |                                                           |   |  |   |  |   |                                                             |   |  |                                                                                                                                                                                                                                                                       |   |                                             |   |  |   |  |   |                                                |   |  |
| 1                                                                                                                                        |                                                                                                                                                                                                                                                                              |   |                                               |   |  |   |  |   |                                                     |   |  |                                                                                                                                                                                                                                                                              |   |                                                  |   |  |   |  |   |                                                  |   |  |                                                                                                                                                                                                                                                                            |   |                                                 |   |  |   |  |   |                                                 |   |  |                                                                                                                                                                                                                                                                                                  |   |                                                           |   |  |   |  |   |                                                             |   |  |                                                                                                                                                                                                                                                                       |   |                                             |   |  |   |  |   |                                                |   |  |
| 16. Researchers and trials sponsors should collaborate with government to strengthen capacity to deliver care services.                  | <table border="1"> <tr><td>5</td><td>I am very familiar with this ethical standard</td></tr> <tr><td>4</td><td></td></tr> <tr><td>3</td><td></td></tr> <tr><td>2</td><td>I am not at all familiar with this ethical standard</td></tr> <tr><td>1</td><td></td></tr> </table> | 5 | I am very familiar with this ethical standard | 4 |  | 3 |  | 2 | I am not at all familiar with this ethical standard | 1 |  | <table border="1"> <tr><td>5</td><td>This ethical standard is very easy to understand</td></tr> <tr><td>4</td><td></td></tr> <tr><td>3</td><td></td></tr> <tr><td>2</td><td>This ethical standard is very hard to understand</td></tr> <tr><td>1</td><td></td></tr> </table> | 5 | This ethical standard is very easy to understand | 4 |  | 3 |  | 2 | This ethical standard is very hard to understand | 1 |  | <table border="1"> <tr><td>5</td><td>This ethical standard is very easy to implement</td></tr> <tr><td>4</td><td></td></tr> <tr><td>3</td><td></td></tr> <tr><td>2</td><td>This ethical standard is very hard to implement</td></tr> <tr><td>1</td><td></td></tr> </table> | 5 | This ethical standard is very easy to implement | 4 |  | 3 |  | 2 | This ethical standard is very hard to implement | 1 |  | <table border="1"> <tr><td>5</td><td>This ethical standard greatly protects trial participants</td></tr> <tr><td>4</td><td></td></tr> <tr><td>3</td><td></td></tr> <tr><td>2</td><td>This ethical standard minimally protects trial participants</td></tr> <tr><td>1</td><td></td></tr> </table> | 5 | This ethical standard greatly protects trial participants | 4 |  | 3 |  | 2 | This ethical standard minimally protects trial participants | 1 |  | <table border="1"> <tr><td>5</td><td>I strongly agree with this ethical standard</td></tr> <tr><td>4</td><td></td></tr> <tr><td>3</td><td></td></tr> <tr><td>2</td><td>I strongly disagree with this ethical standard</td></tr> <tr><td>1</td><td></td></tr> </table> | 5 | I strongly agree with this ethical standard | 4 |  | 3 |  | 2 | I strongly disagree with this ethical standard | 1 |  |
| 5                                                                                                                                        | I am very familiar with this ethical standard                                                                                                                                                                                                                                |   |                                               |   |  |   |  |   |                                                     |   |  |                                                                                                                                                                                                                                                                              |   |                                                  |   |  |   |  |   |                                                  |   |  |                                                                                                                                                                                                                                                                            |   |                                                 |   |  |   |  |   |                                                 |   |  |                                                                                                                                                                                                                                                                                                  |   |                                                           |   |  |   |  |   |                                                             |   |  |                                                                                                                                                                                                                                                                       |   |                                             |   |  |   |  |   |                                                |   |  |
| 4                                                                                                                                        |                                                                                                                                                                                                                                                                              |   |                                               |   |  |   |  |   |                                                     |   |  |                                                                                                                                                                                                                                                                              |   |                                                  |   |  |   |  |   |                                                  |   |  |                                                                                                                                                                                                                                                                            |   |                                                 |   |  |   |  |   |                                                 |   |  |                                                                                                                                                                                                                                                                                                  |   |                                                           |   |  |   |  |   |                                                             |   |  |                                                                                                                                                                                                                                                                       |   |                                             |   |  |   |  |   |                                                |   |  |
| 3                                                                                                                                        |                                                                                                                                                                                                                                                                              |   |                                               |   |  |   |  |   |                                                     |   |  |                                                                                                                                                                                                                                                                              |   |                                                  |   |  |   |  |   |                                                  |   |  |                                                                                                                                                                                                                                                                            |   |                                                 |   |  |   |  |   |                                                 |   |  |                                                                                                                                                                                                                                                                                                  |   |                                                           |   |  |   |  |   |                                                             |   |  |                                                                                                                                                                                                                                                                       |   |                                             |   |  |   |  |   |                                                |   |  |
| 2                                                                                                                                        | I am not at all familiar with this ethical standard                                                                                                                                                                                                                          |   |                                               |   |  |   |  |   |                                                     |   |  |                                                                                                                                                                                                                                                                              |   |                                                  |   |  |   |  |   |                                                  |   |  |                                                                                                                                                                                                                                                                            |   |                                                 |   |  |   |  |   |                                                 |   |  |                                                                                                                                                                                                                                                                                                  |   |                                                           |   |  |   |  |   |                                                             |   |  |                                                                                                                                                                                                                                                                       |   |                                             |   |  |   |  |   |                                                |   |  |
| 1                                                                                                                                        |                                                                                                                                                                                                                                                                              |   |                                               |   |  |   |  |   |                                                     |   |  |                                                                                                                                                                                                                                                                              |   |                                                  |   |  |   |  |   |                                                  |   |  |                                                                                                                                                                                                                                                                            |   |                                                 |   |  |   |  |   |                                                 |   |  |                                                                                                                                                                                                                                                                                                  |   |                                                           |   |  |   |  |   |                                                             |   |  |                                                                                                                                                                                                                                                                       |   |                                             |   |  |   |  |   |                                                |   |  |
| 5                                                                                                                                        | This ethical standard is very easy to understand                                                                                                                                                                                                                             |   |                                               |   |  |   |  |   |                                                     |   |  |                                                                                                                                                                                                                                                                              |   |                                                  |   |  |   |  |   |                                                  |   |  |                                                                                                                                                                                                                                                                            |   |                                                 |   |  |   |  |   |                                                 |   |  |                                                                                                                                                                                                                                                                                                  |   |                                                           |   |  |   |  |   |                                                             |   |  |                                                                                                                                                                                                                                                                       |   |                                             |   |  |   |  |   |                                                |   |  |
| 4                                                                                                                                        |                                                                                                                                                                                                                                                                              |   |                                               |   |  |   |  |   |                                                     |   |  |                                                                                                                                                                                                                                                                              |   |                                                  |   |  |   |  |   |                                                  |   |  |                                                                                                                                                                                                                                                                            |   |                                                 |   |  |   |  |   |                                                 |   |  |                                                                                                                                                                                                                                                                                                  |   |                                                           |   |  |   |  |   |                                                             |   |  |                                                                                                                                                                                                                                                                       |   |                                             |   |  |   |  |   |                                                |   |  |
| 3                                                                                                                                        |                                                                                                                                                                                                                                                                              |   |                                               |   |  |   |  |   |                                                     |   |  |                                                                                                                                                                                                                                                                              |   |                                                  |   |  |   |  |   |                                                  |   |  |                                                                                                                                                                                                                                                                            |   |                                                 |   |  |   |  |   |                                                 |   |  |                                                                                                                                                                                                                                                                                                  |   |                                                           |   |  |   |  |   |                                                             |   |  |                                                                                                                                                                                                                                                                       |   |                                             |   |  |   |  |   |                                                |   |  |
| 2                                                                                                                                        | This ethical standard is very hard to understand                                                                                                                                                                                                                             |   |                                               |   |  |   |  |   |                                                     |   |  |                                                                                                                                                                                                                                                                              |   |                                                  |   |  |   |  |   |                                                  |   |  |                                                                                                                                                                                                                                                                            |   |                                                 |   |  |   |  |   |                                                 |   |  |                                                                                                                                                                                                                                                                                                  |   |                                                           |   |  |   |  |   |                                                             |   |  |                                                                                                                                                                                                                                                                       |   |                                             |   |  |   |  |   |                                                |   |  |
| 1                                                                                                                                        |                                                                                                                                                                                                                                                                              |   |                                               |   |  |   |  |   |                                                     |   |  |                                                                                                                                                                                                                                                                              |   |                                                  |   |  |   |  |   |                                                  |   |  |                                                                                                                                                                                                                                                                            |   |                                                 |   |  |   |  |   |                                                 |   |  |                                                                                                                                                                                                                                                                                                  |   |                                                           |   |  |   |  |   |                                                             |   |  |                                                                                                                                                                                                                                                                       |   |                                             |   |  |   |  |   |                                                |   |  |
| 5                                                                                                                                        | This ethical standard is very easy to implement                                                                                                                                                                                                                              |   |                                               |   |  |   |  |   |                                                     |   |  |                                                                                                                                                                                                                                                                              |   |                                                  |   |  |   |  |   |                                                  |   |  |                                                                                                                                                                                                                                                                            |   |                                                 |   |  |   |  |   |                                                 |   |  |                                                                                                                                                                                                                                                                                                  |   |                                                           |   |  |   |  |   |                                                             |   |  |                                                                                                                                                                                                                                                                       |   |                                             |   |  |   |  |   |                                                |   |  |
| 4                                                                                                                                        |                                                                                                                                                                                                                                                                              |   |                                               |   |  |   |  |   |                                                     |   |  |                                                                                                                                                                                                                                                                              |   |                                                  |   |  |   |  |   |                                                  |   |  |                                                                                                                                                                                                                                                                            |   |                                                 |   |  |   |  |   |                                                 |   |  |                                                                                                                                                                                                                                                                                                  |   |                                                           |   |  |   |  |   |                                                             |   |  |                                                                                                                                                                                                                                                                       |   |                                             |   |  |   |  |   |                                                |   |  |
| 3                                                                                                                                        |                                                                                                                                                                                                                                                                              |   |                                               |   |  |   |  |   |                                                     |   |  |                                                                                                                                                                                                                                                                              |   |                                                  |   |  |   |  |   |                                                  |   |  |                                                                                                                                                                                                                                                                            |   |                                                 |   |  |   |  |   |                                                 |   |  |                                                                                                                                                                                                                                                                                                  |   |                                                           |   |  |   |  |   |                                                             |   |  |                                                                                                                                                                                                                                                                       |   |                                             |   |  |   |  |   |                                                |   |  |
| 2                                                                                                                                        | This ethical standard is very hard to implement                                                                                                                                                                                                                              |   |                                               |   |  |   |  |   |                                                     |   |  |                                                                                                                                                                                                                                                                              |   |                                                  |   |  |   |  |   |                                                  |   |  |                                                                                                                                                                                                                                                                            |   |                                                 |   |  |   |  |   |                                                 |   |  |                                                                                                                                                                                                                                                                                                  |   |                                                           |   |  |   |  |   |                                                             |   |  |                                                                                                                                                                                                                                                                       |   |                                             |   |  |   |  |   |                                                |   |  |
| 1                                                                                                                                        |                                                                                                                                                                                                                                                                              |   |                                               |   |  |   |  |   |                                                     |   |  |                                                                                                                                                                                                                                                                              |   |                                                  |   |  |   |  |   |                                                  |   |  |                                                                                                                                                                                                                                                                            |   |                                                 |   |  |   |  |   |                                                 |   |  |                                                                                                                                                                                                                                                                                                  |   |                                                           |   |  |   |  |   |                                                             |   |  |                                                                                                                                                                                                                                                                       |   |                                             |   |  |   |  |   |                                                |   |  |
| 5                                                                                                                                        | This ethical standard greatly protects trial participants                                                                                                                                                                                                                    |   |                                               |   |  |   |  |   |                                                     |   |  |                                                                                                                                                                                                                                                                              |   |                                                  |   |  |   |  |   |                                                  |   |  |                                                                                                                                                                                                                                                                            |   |                                                 |   |  |   |  |   |                                                 |   |  |                                                                                                                                                                                                                                                                                                  |   |                                                           |   |  |   |  |   |                                                             |   |  |                                                                                                                                                                                                                                                                       |   |                                             |   |  |   |  |   |                                                |   |  |
| 4                                                                                                                                        |                                                                                                                                                                                                                                                                              |   |                                               |   |  |   |  |   |                                                     |   |  |                                                                                                                                                                                                                                                                              |   |                                                  |   |  |   |  |   |                                                  |   |  |                                                                                                                                                                                                                                                                            |   |                                                 |   |  |   |  |   |                                                 |   |  |                                                                                                                                                                                                                                                                                                  |   |                                                           |   |  |   |  |   |                                                             |   |  |                                                                                                                                                                                                                                                                       |   |                                             |   |  |   |  |   |                                                |   |  |
| 3                                                                                                                                        |                                                                                                                                                                                                                                                                              |   |                                               |   |  |   |  |   |                                                     |   |  |                                                                                                                                                                                                                                                                              |   |                                                  |   |  |   |  |   |                                                  |   |  |                                                                                                                                                                                                                                                                            |   |                                                 |   |  |   |  |   |                                                 |   |  |                                                                                                                                                                                                                                                                                                  |   |                                                           |   |  |   |  |   |                                                             |   |  |                                                                                                                                                                                                                                                                       |   |                                             |   |  |   |  |   |                                                |   |  |
| 2                                                                                                                                        | This ethical standard minimally protects trial participants                                                                                                                                                                                                                  |   |                                               |   |  |   |  |   |                                                     |   |  |                                                                                                                                                                                                                                                                              |   |                                                  |   |  |   |  |   |                                                  |   |  |                                                                                                                                                                                                                                                                            |   |                                                 |   |  |   |  |   |                                                 |   |  |                                                                                                                                                                                                                                                                                                  |   |                                                           |   |  |   |  |   |                                                             |   |  |                                                                                                                                                                                                                                                                       |   |                                             |   |  |   |  |   |                                                |   |  |
| 1                                                                                                                                        |                                                                                                                                                                                                                                                                              |   |                                               |   |  |   |  |   |                                                     |   |  |                                                                                                                                                                                                                                                                              |   |                                                  |   |  |   |  |   |                                                  |   |  |                                                                                                                                                                                                                                                                            |   |                                                 |   |  |   |  |   |                                                 |   |  |                                                                                                                                                                                                                                                                                                  |   |                                                           |   |  |   |  |   |                                                             |   |  |                                                                                                                                                                                                                                                                       |   |                                             |   |  |   |  |   |                                                |   |  |
| 5                                                                                                                                        | I strongly agree with this ethical standard                                                                                                                                                                                                                                  |   |                                               |   |  |   |  |   |                                                     |   |  |                                                                                                                                                                                                                                                                              |   |                                                  |   |  |   |  |   |                                                  |   |  |                                                                                                                                                                                                                                                                            |   |                                                 |   |  |   |  |   |                                                 |   |  |                                                                                                                                                                                                                                                                                                  |   |                                                           |   |  |   |  |   |                                                             |   |  |                                                                                                                                                                                                                                                                       |   |                                             |   |  |   |  |   |                                                |   |  |
| 4                                                                                                                                        |                                                                                                                                                                                                                                                                              |   |                                               |   |  |   |  |   |                                                     |   |  |                                                                                                                                                                                                                                                                              |   |                                                  |   |  |   |  |   |                                                  |   |  |                                                                                                                                                                                                                                                                            |   |                                                 |   |  |   |  |   |                                                 |   |  |                                                                                                                                                                                                                                                                                                  |   |                                                           |   |  |   |  |   |                                                             |   |  |                                                                                                                                                                                                                                                                       |   |                                             |   |  |   |  |   |                                                |   |  |
| 3                                                                                                                                        |                                                                                                                                                                                                                                                                              |   |                                               |   |  |   |  |   |                                                     |   |  |                                                                                                                                                                                                                                                                              |   |                                                  |   |  |   |  |   |                                                  |   |  |                                                                                                                                                                                                                                                                            |   |                                                 |   |  |   |  |   |                                                 |   |  |                                                                                                                                                                                                                                                                                                  |   |                                                           |   |  |   |  |   |                                                             |   |  |                                                                                                                                                                                                                                                                       |   |                                             |   |  |   |  |   |                                                |   |  |
| 2                                                                                                                                        | I strongly disagree with this ethical standard                                                                                                                                                                                                                               |   |                                               |   |  |   |  |   |                                                     |   |  |                                                                                                                                                                                                                                                                              |   |                                                  |   |  |   |  |   |                                                  |   |  |                                                                                                                                                                                                                                                                            |   |                                                 |   |  |   |  |   |                                                 |   |  |                                                                                                                                                                                                                                                                                                  |   |                                                           |   |  |   |  |   |                                                             |   |  |                                                                                                                                                                                                                                                                       |   |                                             |   |  |   |  |   |                                                |   |  |
| 1                                                                                                                                        |                                                                                                                                                                                                                                                                              |   |                                               |   |  |   |  |   |                                                     |   |  |                                                                                                                                                                                                                                                                              |   |                                                  |   |  |   |  |   |                                                  |   |  |                                                                                                                                                                                                                                                                            |   |                                                 |   |  |   |  |   |                                                 |   |  |                                                                                                                                                                                                                                                                                                  |   |                                                           |   |  |   |  |   |                                                             |   |  |                                                                                                                                                                                                                                                                       |   |                                             |   |  |   |  |   |                                                |   |  |
| 17. In the informed consent process, trial participants should be told what care and treatment services they will receive.               | <table border="1"> <tr><td>5</td><td>I am very familiar with this ethical standard</td></tr> <tr><td>4</td><td></td></tr> <tr><td>3</td><td></td></tr> <tr><td>2</td><td>I am not at all familiar with this ethical standard</td></tr> <tr><td>1</td><td></td></tr> </table> | 5 | I am very familiar with this ethical standard | 4 |  | 3 |  | 2 | I am not at all familiar with this ethical standard | 1 |  | <table border="1"> <tr><td>5</td><td>This ethical standard is very easy to understand</td></tr> <tr><td>4</td><td></td></tr> <tr><td>3</td><td></td></tr> <tr><td>2</td><td>This ethical standard is very hard to understand</td></tr> <tr><td>1</td><td></td></tr> </table> | 5 | This ethical standard is very easy to understand | 4 |  | 3 |  | 2 | This ethical standard is very hard to understand | 1 |  | <table border="1"> <tr><td>5</td><td>This ethical standard is very easy to implement</td></tr> <tr><td>4</td><td></td></tr> <tr><td>3</td><td></td></tr> <tr><td>2</td><td>This ethical standard is very hard to implement</td></tr> <tr><td>1</td><td></td></tr> </table> | 5 | This ethical standard is very easy to implement | 4 |  | 3 |  | 2 | This ethical standard is very hard to implement | 1 |  | <table border="1"> <tr><td>5</td><td>This ethical standard greatly protects trial participants</td></tr> <tr><td>4</td><td></td></tr> <tr><td>3</td><td></td></tr> <tr><td>2</td><td>This ethical standard minimally protects trial participants</td></tr> <tr><td>1</td><td></td></tr> </table> | 5 | This ethical standard greatly protects trial participants | 4 |  | 3 |  | 2 | This ethical standard minimally protects trial participants | 1 |  | <table border="1"> <tr><td>5</td><td>I strongly agree with this ethical standard</td></tr> <tr><td>4</td><td></td></tr> <tr><td>3</td><td></td></tr> <tr><td>2</td><td>I strongly disagree with this ethical standard</td></tr> <tr><td>1</td><td></td></tr> </table> | 5 | I strongly agree with this ethical standard | 4 |  | 3 |  | 2 | I strongly disagree with this ethical standard | 1 |  |
| 5                                                                                                                                        | I am very familiar with this ethical standard                                                                                                                                                                                                                                |   |                                               |   |  |   |  |   |                                                     |   |  |                                                                                                                                                                                                                                                                              |   |                                                  |   |  |   |  |   |                                                  |   |  |                                                                                                                                                                                                                                                                            |   |                                                 |   |  |   |  |   |                                                 |   |  |                                                                                                                                                                                                                                                                                                  |   |                                                           |   |  |   |  |   |                                                             |   |  |                                                                                                                                                                                                                                                                       |   |                                             |   |  |   |  |   |                                                |   |  |
| 4                                                                                                                                        |                                                                                                                                                                                                                                                                              |   |                                               |   |  |   |  |   |                                                     |   |  |                                                                                                                                                                                                                                                                              |   |                                                  |   |  |   |  |   |                                                  |   |  |                                                                                                                                                                                                                                                                            |   |                                                 |   |  |   |  |   |                                                 |   |  |                                                                                                                                                                                                                                                                                                  |   |                                                           |   |  |   |  |   |                                                             |   |  |                                                                                                                                                                                                                                                                       |   |                                             |   |  |   |  |   |                                                |   |  |
| 3                                                                                                                                        |                                                                                                                                                                                                                                                                              |   |                                               |   |  |   |  |   |                                                     |   |  |                                                                                                                                                                                                                                                                              |   |                                                  |   |  |   |  |   |                                                  |   |  |                                                                                                                                                                                                                                                                            |   |                                                 |   |  |   |  |   |                                                 |   |  |                                                                                                                                                                                                                                                                                                  |   |                                                           |   |  |   |  |   |                                                             |   |  |                                                                                                                                                                                                                                                                       |   |                                             |   |  |   |  |   |                                                |   |  |
| 2                                                                                                                                        | I am not at all familiar with this ethical standard                                                                                                                                                                                                                          |   |                                               |   |  |   |  |   |                                                     |   |  |                                                                                                                                                                                                                                                                              |   |                                                  |   |  |   |  |   |                                                  |   |  |                                                                                                                                                                                                                                                                            |   |                                                 |   |  |   |  |   |                                                 |   |  |                                                                                                                                                                                                                                                                                                  |   |                                                           |   |  |   |  |   |                                                             |   |  |                                                                                                                                                                                                                                                                       |   |                                             |   |  |   |  |   |                                                |   |  |
| 1                                                                                                                                        |                                                                                                                                                                                                                                                                              |   |                                               |   |  |   |  |   |                                                     |   |  |                                                                                                                                                                                                                                                                              |   |                                                  |   |  |   |  |   |                                                  |   |  |                                                                                                                                                                                                                                                                            |   |                                                 |   |  |   |  |   |                                                 |   |  |                                                                                                                                                                                                                                                                                                  |   |                                                           |   |  |   |  |   |                                                             |   |  |                                                                                                                                                                                                                                                                       |   |                                             |   |  |   |  |   |                                                |   |  |
| 5                                                                                                                                        | This ethical standard is very easy to understand                                                                                                                                                                                                                             |   |                                               |   |  |   |  |   |                                                     |   |  |                                                                                                                                                                                                                                                                              |   |                                                  |   |  |   |  |   |                                                  |   |  |                                                                                                                                                                                                                                                                            |   |                                                 |   |  |   |  |   |                                                 |   |  |                                                                                                                                                                                                                                                                                                  |   |                                                           |   |  |   |  |   |                                                             |   |  |                                                                                                                                                                                                                                                                       |   |                                             |   |  |   |  |   |                                                |   |  |
| 4                                                                                                                                        |                                                                                                                                                                                                                                                                              |   |                                               |   |  |   |  |   |                                                     |   |  |                                                                                                                                                                                                                                                                              |   |                                                  |   |  |   |  |   |                                                  |   |  |                                                                                                                                                                                                                                                                            |   |                                                 |   |  |   |  |   |                                                 |   |  |                                                                                                                                                                                                                                                                                                  |   |                                                           |   |  |   |  |   |                                                             |   |  |                                                                                                                                                                                                                                                                       |   |                                             |   |  |   |  |   |                                                |   |  |
| 3                                                                                                                                        |                                                                                                                                                                                                                                                                              |   |                                               |   |  |   |  |   |                                                     |   |  |                                                                                                                                                                                                                                                                              |   |                                                  |   |  |   |  |   |                                                  |   |  |                                                                                                                                                                                                                                                                            |   |                                                 |   |  |   |  |   |                                                 |   |  |                                                                                                                                                                                                                                                                                                  |   |                                                           |   |  |   |  |   |                                                             |   |  |                                                                                                                                                                                                                                                                       |   |                                             |   |  |   |  |   |                                                |   |  |
| 2                                                                                                                                        | This ethical standard is very hard to understand                                                                                                                                                                                                                             |   |                                               |   |  |   |  |   |                                                     |   |  |                                                                                                                                                                                                                                                                              |   |                                                  |   |  |   |  |   |                                                  |   |  |                                                                                                                                                                                                                                                                            |   |                                                 |   |  |   |  |   |                                                 |   |  |                                                                                                                                                                                                                                                                                                  |   |                                                           |   |  |   |  |   |                                                             |   |  |                                                                                                                                                                                                                                                                       |   |                                             |   |  |   |  |   |                                                |   |  |
| 1                                                                                                                                        |                                                                                                                                                                                                                                                                              |   |                                               |   |  |   |  |   |                                                     |   |  |                                                                                                                                                                                                                                                                              |   |                                                  |   |  |   |  |   |                                                  |   |  |                                                                                                                                                                                                                                                                            |   |                                                 |   |  |   |  |   |                                                 |   |  |                                                                                                                                                                                                                                                                                                  |   |                                                           |   |  |   |  |   |                                                             |   |  |                                                                                                                                                                                                                                                                       |   |                                             |   |  |   |  |   |                                                |   |  |
| 5                                                                                                                                        | This ethical standard is very easy to implement                                                                                                                                                                                                                              |   |                                               |   |  |   |  |   |                                                     |   |  |                                                                                                                                                                                                                                                                              |   |                                                  |   |  |   |  |   |                                                  |   |  |                                                                                                                                                                                                                                                                            |   |                                                 |   |  |   |  |   |                                                 |   |  |                                                                                                                                                                                                                                                                                                  |   |                                                           |   |  |   |  |   |                                                             |   |  |                                                                                                                                                                                                                                                                       |   |                                             |   |  |   |  |   |                                                |   |  |
| 4                                                                                                                                        |                                                                                                                                                                                                                                                                              |   |                                               |   |  |   |  |   |                                                     |   |  |                                                                                                                                                                                                                                                                              |   |                                                  |   |  |   |  |   |                                                  |   |  |                                                                                                                                                                                                                                                                            |   |                                                 |   |  |   |  |   |                                                 |   |  |                                                                                                                                                                                                                                                                                                  |   |                                                           |   |  |   |  |   |                                                             |   |  |                                                                                                                                                                                                                                                                       |   |                                             |   |  |   |  |   |                                                |   |  |
| 3                                                                                                                                        |                                                                                                                                                                                                                                                                              |   |                                               |   |  |   |  |   |                                                     |   |  |                                                                                                                                                                                                                                                                              |   |                                                  |   |  |   |  |   |                                                  |   |  |                                                                                                                                                                                                                                                                            |   |                                                 |   |  |   |  |   |                                                 |   |  |                                                                                                                                                                                                                                                                                                  |   |                                                           |   |  |   |  |   |                                                             |   |  |                                                                                                                                                                                                                                                                       |   |                                             |   |  |   |  |   |                                                |   |  |
| 2                                                                                                                                        | This ethical standard is very hard to implement                                                                                                                                                                                                                              |   |                                               |   |  |   |  |   |                                                     |   |  |                                                                                                                                                                                                                                                                              |   |                                                  |   |  |   |  |   |                                                  |   |  |                                                                                                                                                                                                                                                                            |   |                                                 |   |  |   |  |   |                                                 |   |  |                                                                                                                                                                                                                                                                                                  |   |                                                           |   |  |   |  |   |                                                             |   |  |                                                                                                                                                                                                                                                                       |   |                                             |   |  |   |  |   |                                                |   |  |
| 1                                                                                                                                        |                                                                                                                                                                                                                                                                              |   |                                               |   |  |   |  |   |                                                     |   |  |                                                                                                                                                                                                                                                                              |   |                                                  |   |  |   |  |   |                                                  |   |  |                                                                                                                                                                                                                                                                            |   |                                                 |   |  |   |  |   |                                                 |   |  |                                                                                                                                                                                                                                                                                                  |   |                                                           |   |  |   |  |   |                                                             |   |  |                                                                                                                                                                                                                                                                       |   |                                             |   |  |   |  |   |                                                |   |  |
| 5                                                                                                                                        | This ethical standard greatly protects trial participants                                                                                                                                                                                                                    |   |                                               |   |  |   |  |   |                                                     |   |  |                                                                                                                                                                                                                                                                              |   |                                                  |   |  |   |  |   |                                                  |   |  |                                                                                                                                                                                                                                                                            |   |                                                 |   |  |   |  |   |                                                 |   |  |                                                                                                                                                                                                                                                                                                  |   |                                                           |   |  |   |  |   |                                                             |   |  |                                                                                                                                                                                                                                                                       |   |                                             |   |  |   |  |   |                                                |   |  |
| 4                                                                                                                                        |                                                                                                                                                                                                                                                                              |   |                                               |   |  |   |  |   |                                                     |   |  |                                                                                                                                                                                                                                                                              |   |                                                  |   |  |   |  |   |                                                  |   |  |                                                                                                                                                                                                                                                                            |   |                                                 |   |  |   |  |   |                                                 |   |  |                                                                                                                                                                                                                                                                                                  |   |                                                           |   |  |   |  |   |                                                             |   |  |                                                                                                                                                                                                                                                                       |   |                                             |   |  |   |  |   |                                                |   |  |
| 3                                                                                                                                        |                                                                                                                                                                                                                                                                              |   |                                               |   |  |   |  |   |                                                     |   |  |                                                                                                                                                                                                                                                                              |   |                                                  |   |  |   |  |   |                                                  |   |  |                                                                                                                                                                                                                                                                            |   |                                                 |   |  |   |  |   |                                                 |   |  |                                                                                                                                                                                                                                                                                                  |   |                                                           |   |  |   |  |   |                                                             |   |  |                                                                                                                                                                                                                                                                       |   |                                             |   |  |   |  |   |                                                |   |  |
| 2                                                                                                                                        | This ethical standard minimally protects trial participants                                                                                                                                                                                                                  |   |                                               |   |  |   |  |   |                                                     |   |  |                                                                                                                                                                                                                                                                              |   |                                                  |   |  |   |  |   |                                                  |   |  |                                                                                                                                                                                                                                                                            |   |                                                 |   |  |   |  |   |                                                 |   |  |                                                                                                                                                                                                                                                                                                  |   |                                                           |   |  |   |  |   |                                                             |   |  |                                                                                                                                                                                                                                                                       |   |                                             |   |  |   |  |   |                                                |   |  |
| 1                                                                                                                                        |                                                                                                                                                                                                                                                                              |   |                                               |   |  |   |  |   |                                                     |   |  |                                                                                                                                                                                                                                                                              |   |                                                  |   |  |   |  |   |                                                  |   |  |                                                                                                                                                                                                                                                                            |   |                                                 |   |  |   |  |   |                                                 |   |  |                                                                                                                                                                                                                                                                                                  |   |                                                           |   |  |   |  |   |                                                             |   |  |                                                                                                                                                                                                                                                                       |   |                                             |   |  |   |  |   |                                                |   |  |
| 5                                                                                                                                        | I strongly agree with this ethical standard                                                                                                                                                                                                                                  |   |                                               |   |  |   |  |   |                                                     |   |  |                                                                                                                                                                                                                                                                              |   |                                                  |   |  |   |  |   |                                                  |   |  |                                                                                                                                                                                                                                                                            |   |                                                 |   |  |   |  |   |                                                 |   |  |                                                                                                                                                                                                                                                                                                  |   |                                                           |   |  |   |  |   |                                                             |   |  |                                                                                                                                                                                                                                                                       |   |                                             |   |  |   |  |   |                                                |   |  |
| 4                                                                                                                                        |                                                                                                                                                                                                                                                                              |   |                                               |   |  |   |  |   |                                                     |   |  |                                                                                                                                                                                                                                                                              |   |                                                  |   |  |   |  |   |                                                  |   |  |                                                                                                                                                                                                                                                                            |   |                                                 |   |  |   |  |   |                                                 |   |  |                                                                                                                                                                                                                                                                                                  |   |                                                           |   |  |   |  |   |                                                             |   |  |                                                                                                                                                                                                                                                                       |   |                                             |   |  |   |  |   |                                                |   |  |
| 3                                                                                                                                        |                                                                                                                                                                                                                                                                              |   |                                               |   |  |   |  |   |                                                     |   |  |                                                                                                                                                                                                                                                                              |   |                                                  |   |  |   |  |   |                                                  |   |  |                                                                                                                                                                                                                                                                            |   |                                                 |   |  |   |  |   |                                                 |   |  |                                                                                                                                                                                                                                                                                                  |   |                                                           |   |  |   |  |   |                                                             |   |  |                                                                                                                                                                                                                                                                       |   |                                             |   |  |   |  |   |                                                |   |  |
| 2                                                                                                                                        | I strongly disagree with this ethical standard                                                                                                                                                                                                                               |   |                                               |   |  |   |  |   |                                                     |   |  |                                                                                                                                                                                                                                                                              |   |                                                  |   |  |   |  |   |                                                  |   |  |                                                                                                                                                                                                                                                                            |   |                                                 |   |  |   |  |   |                                                 |   |  |                                                                                                                                                                                                                                                                                                  |   |                                                           |   |  |   |  |   |                                                             |   |  |                                                                                                                                                                                                                                                                       |   |                                             |   |  |   |  |   |                                                |   |  |
| 1                                                                                                                                        |                                                                                                                                                                                                                                                                              |   |                                               |   |  |   |  |   |                                                     |   |  |                                                                                                                                                                                                                                                                              |   |                                                  |   |  |   |  |   |                                                  |   |  |                                                                                                                                                                                                                                                                            |   |                                                 |   |  |   |  |   |                                                 |   |  |                                                                                                                                                                                                                                                                                                  |   |                                                           |   |  |   |  |   |                                                             |   |  |                                                                                                                                                                                                                                                                       |   |                                             |   |  |   |  |   |                                                |   |  |
| 18. Trials should only take place in communities where participants will have ongoing access to psychosocial services and legal support. | <table border="1"> <tr><td>5</td><td>I am very familiar with this ethical standard</td></tr> <tr><td>4</td><td></td></tr> <tr><td>3</td><td></td></tr> <tr><td>2</td><td>I am not at all familiar with this ethical standard</td></tr> <tr><td>1</td><td></td></tr> </table> | 5 | I am very familiar with this ethical standard | 4 |  | 3 |  | 2 | I am not at all familiar with this ethical standard | 1 |  | <table border="1"> <tr><td>5</td><td>This ethical standard is very easy to understand</td></tr> <tr><td>4</td><td></td></tr> <tr><td>3</td><td></td></tr> <tr><td>2</td><td>This ethical standard is very hard to understand</td></tr> <tr><td>1</td><td></td></tr> </table> | 5 | This ethical standard is very easy to understand | 4 |  | 3 |  | 2 | This ethical standard is very hard to understand | 1 |  | <table border="1"> <tr><td>5</td><td>This ethical standard is very easy to implement</td></tr> <tr><td>4</td><td></td></tr> <tr><td>3</td><td></td></tr> <tr><td>2</td><td>This ethical standard is very hard to implement</td></tr> <tr><td>1</td><td></td></tr> </table> | 5 | This ethical standard is very easy to implement | 4 |  | 3 |  | 2 | This ethical standard is very hard to implement | 1 |  | <table border="1"> <tr><td>5</td><td>This ethical standard greatly protects trial participants</td></tr> <tr><td>4</td><td></td></tr> <tr><td>3</td><td></td></tr> <tr><td>2</td><td>This ethical standard minimally protects trial participants</td></tr> <tr><td>1</td><td></td></tr> </table> | 5 | This ethical standard greatly protects trial participants | 4 |  | 3 |  | 2 | This ethical standard minimally protects trial participants | 1 |  | <table border="1"> <tr><td>5</td><td>I strongly agree with this ethical standard</td></tr> <tr><td>4</td><td></td></tr> <tr><td>3</td><td></td></tr> <tr><td>2</td><td>I strongly disagree with this ethical standard</td></tr> <tr><td>1</td><td></td></tr> </table> | 5 | I strongly agree with this ethical standard | 4 |  | 3 |  | 2 | I strongly disagree with this ethical standard | 1 |  |
| 5                                                                                                                                        | I am very familiar with this ethical standard                                                                                                                                                                                                                                |   |                                               |   |  |   |  |   |                                                     |   |  |                                                                                                                                                                                                                                                                              |   |                                                  |   |  |   |  |   |                                                  |   |  |                                                                                                                                                                                                                                                                            |   |                                                 |   |  |   |  |   |                                                 |   |  |                                                                                                                                                                                                                                                                                                  |   |                                                           |   |  |   |  |   |                                                             |   |  |                                                                                                                                                                                                                                                                       |   |                                             |   |  |   |  |   |                                                |   |  |
| 4                                                                                                                                        |                                                                                                                                                                                                                                                                              |   |                                               |   |  |   |  |   |                                                     |   |  |                                                                                                                                                                                                                                                                              |   |                                                  |   |  |   |  |   |                                                  |   |  |                                                                                                                                                                                                                                                                            |   |                                                 |   |  |   |  |   |                                                 |   |  |                                                                                                                                                                                                                                                                                                  |   |                                                           |   |  |   |  |   |                                                             |   |  |                                                                                                                                                                                                                                                                       |   |                                             |   |  |   |  |   |                                                |   |  |
| 3                                                                                                                                        |                                                                                                                                                                                                                                                                              |   |                                               |   |  |   |  |   |                                                     |   |  |                                                                                                                                                                                                                                                                              |   |                                                  |   |  |   |  |   |                                                  |   |  |                                                                                                                                                                                                                                                                            |   |                                                 |   |  |   |  |   |                                                 |   |  |                                                                                                                                                                                                                                                                                                  |   |                                                           |   |  |   |  |   |                                                             |   |  |                                                                                                                                                                                                                                                                       |   |                                             |   |  |   |  |   |                                                |   |  |
| 2                                                                                                                                        | I am not at all familiar with this ethical standard                                                                                                                                                                                                                          |   |                                               |   |  |   |  |   |                                                     |   |  |                                                                                                                                                                                                                                                                              |   |                                                  |   |  |   |  |   |                                                  |   |  |                                                                                                                                                                                                                                                                            |   |                                                 |   |  |   |  |   |                                                 |   |  |                                                                                                                                                                                                                                                                                                  |   |                                                           |   |  |   |  |   |                                                             |   |  |                                                                                                                                                                                                                                                                       |   |                                             |   |  |   |  |   |                                                |   |  |
| 1                                                                                                                                        |                                                                                                                                                                                                                                                                              |   |                                               |   |  |   |  |   |                                                     |   |  |                                                                                                                                                                                                                                                                              |   |                                                  |   |  |   |  |   |                                                  |   |  |                                                                                                                                                                                                                                                                            |   |                                                 |   |  |   |  |   |                                                 |   |  |                                                                                                                                                                                                                                                                                                  |   |                                                           |   |  |   |  |   |                                                             |   |  |                                                                                                                                                                                                                                                                       |   |                                             |   |  |   |  |   |                                                |   |  |
| 5                                                                                                                                        | This ethical standard is very easy to understand                                                                                                                                                                                                                             |   |                                               |   |  |   |  |   |                                                     |   |  |                                                                                                                                                                                                                                                                              |   |                                                  |   |  |   |  |   |                                                  |   |  |                                                                                                                                                                                                                                                                            |   |                                                 |   |  |   |  |   |                                                 |   |  |                                                                                                                                                                                                                                                                                                  |   |                                                           |   |  |   |  |   |                                                             |   |  |                                                                                                                                                                                                                                                                       |   |                                             |   |  |   |  |   |                                                |   |  |
| 4                                                                                                                                        |                                                                                                                                                                                                                                                                              |   |                                               |   |  |   |  |   |                                                     |   |  |                                                                                                                                                                                                                                                                              |   |                                                  |   |  |   |  |   |                                                  |   |  |                                                                                                                                                                                                                                                                            |   |                                                 |   |  |   |  |   |                                                 |   |  |                                                                                                                                                                                                                                                                                                  |   |                                                           |   |  |   |  |   |                                                             |   |  |                                                                                                                                                                                                                                                                       |   |                                             |   |  |   |  |   |                                                |   |  |
| 3                                                                                                                                        |                                                                                                                                                                                                                                                                              |   |                                               |   |  |   |  |   |                                                     |   |  |                                                                                                                                                                                                                                                                              |   |                                                  |   |  |   |  |   |                                                  |   |  |                                                                                                                                                                                                                                                                            |   |                                                 |   |  |   |  |   |                                                 |   |  |                                                                                                                                                                                                                                                                                                  |   |                                                           |   |  |   |  |   |                                                             |   |  |                                                                                                                                                                                                                                                                       |   |                                             |   |  |   |  |   |                                                |   |  |
| 2                                                                                                                                        | This ethical standard is very hard to understand                                                                                                                                                                                                                             |   |                                               |   |  |   |  |   |                                                     |   |  |                                                                                                                                                                                                                                                                              |   |                                                  |   |  |   |  |   |                                                  |   |  |                                                                                                                                                                                                                                                                            |   |                                                 |   |  |   |  |   |                                                 |   |  |                                                                                                                                                                                                                                                                                                  |   |                                                           |   |  |   |  |   |                                                             |   |  |                                                                                                                                                                                                                                                                       |   |                                             |   |  |   |  |   |                                                |   |  |
| 1                                                                                                                                        |                                                                                                                                                                                                                                                                              |   |                                               |   |  |   |  |   |                                                     |   |  |                                                                                                                                                                                                                                                                              |   |                                                  |   |  |   |  |   |                                                  |   |  |                                                                                                                                                                                                                                                                            |   |                                                 |   |  |   |  |   |                                                 |   |  |                                                                                                                                                                                                                                                                                                  |   |                                                           |   |  |   |  |   |                                                             |   |  |                                                                                                                                                                                                                                                                       |   |                                             |   |  |   |  |   |                                                |   |  |
| 5                                                                                                                                        | This ethical standard is very easy to implement                                                                                                                                                                                                                              |   |                                               |   |  |   |  |   |                                                     |   |  |                                                                                                                                                                                                                                                                              |   |                                                  |   |  |   |  |   |                                                  |   |  |                                                                                                                                                                                                                                                                            |   |                                                 |   |  |   |  |   |                                                 |   |  |                                                                                                                                                                                                                                                                                                  |   |                                                           |   |  |   |  |   |                                                             |   |  |                                                                                                                                                                                                                                                                       |   |                                             |   |  |   |  |   |                                                |   |  |
| 4                                                                                                                                        |                                                                                                                                                                                                                                                                              |   |                                               |   |  |   |  |   |                                                     |   |  |                                                                                                                                                                                                                                                                              |   |                                                  |   |  |   |  |   |                                                  |   |  |                                                                                                                                                                                                                                                                            |   |                                                 |   |  |   |  |   |                                                 |   |  |                                                                                                                                                                                                                                                                                                  |   |                                                           |   |  |   |  |   |                                                             |   |  |                                                                                                                                                                                                                                                                       |   |                                             |   |  |   |  |   |                                                |   |  |
| 3                                                                                                                                        |                                                                                                                                                                                                                                                                              |   |                                               |   |  |   |  |   |                                                     |   |  |                                                                                                                                                                                                                                                                              |   |                                                  |   |  |   |  |   |                                                  |   |  |                                                                                                                                                                                                                                                                            |   |                                                 |   |  |   |  |   |                                                 |   |  |                                                                                                                                                                                                                                                                                                  |   |                                                           |   |  |   |  |   |                                                             |   |  |                                                                                                                                                                                                                                                                       |   |                                             |   |  |   |  |   |                                                |   |  |
| 2                                                                                                                                        | This ethical standard is very hard to implement                                                                                                                                                                                                                              |   |                                               |   |  |   |  |   |                                                     |   |  |                                                                                                                                                                                                                                                                              |   |                                                  |   |  |   |  |   |                                                  |   |  |                                                                                                                                                                                                                                                                            |   |                                                 |   |  |   |  |   |                                                 |   |  |                                                                                                                                                                                                                                                                                                  |   |                                                           |   |  |   |  |   |                                                             |   |  |                                                                                                                                                                                                                                                                       |   |                                             |   |  |   |  |   |                                                |   |  |
| 1                                                                                                                                        |                                                                                                                                                                                                                                                                              |   |                                               |   |  |   |  |   |                                                     |   |  |                                                                                                                                                                                                                                                                              |   |                                                  |   |  |   |  |   |                                                  |   |  |                                                                                                                                                                                                                                                                            |   |                                                 |   |  |   |  |   |                                                 |   |  |                                                                                                                                                                                                                                                                                                  |   |                                                           |   |  |   |  |   |                                                             |   |  |                                                                                                                                                                                                                                                                       |   |                                             |   |  |   |  |   |                                                |   |  |
| 5                                                                                                                                        | This ethical standard greatly protects trial participants                                                                                                                                                                                                                    |   |                                               |   |  |   |  |   |                                                     |   |  |                                                                                                                                                                                                                                                                              |   |                                                  |   |  |   |  |   |                                                  |   |  |                                                                                                                                                                                                                                                                            |   |                                                 |   |  |   |  |   |                                                 |   |  |                                                                                                                                                                                                                                                                                                  |   |                                                           |   |  |   |  |   |                                                             |   |  |                                                                                                                                                                                                                                                                       |   |                                             |   |  |   |  |   |                                                |   |  |
| 4                                                                                                                                        |                                                                                                                                                                                                                                                                              |   |                                               |   |  |   |  |   |                                                     |   |  |                                                                                                                                                                                                                                                                              |   |                                                  |   |  |   |  |   |                                                  |   |  |                                                                                                                                                                                                                                                                            |   |                                                 |   |  |   |  |   |                                                 |   |  |                                                                                                                                                                                                                                                                                                  |   |                                                           |   |  |   |  |   |                                                             |   |  |                                                                                                                                                                                                                                                                       |   |                                             |   |  |   |  |   |                                                |   |  |
| 3                                                                                                                                        |                                                                                                                                                                                                                                                                              |   |                                               |   |  |   |  |   |                                                     |   |  |                                                                                                                                                                                                                                                                              |   |                                                  |   |  |   |  |   |                                                  |   |  |                                                                                                                                                                                                                                                                            |   |                                                 |   |  |   |  |   |                                                 |   |  |                                                                                                                                                                                                                                                                                                  |   |                                                           |   |  |   |  |   |                                                             |   |  |                                                                                                                                                                                                                                                                       |   |                                             |   |  |   |  |   |                                                |   |  |
| 2                                                                                                                                        | This ethical standard minimally protects trial participants                                                                                                                                                                                                                  |   |                                               |   |  |   |  |   |                                                     |   |  |                                                                                                                                                                                                                                                                              |   |                                                  |   |  |   |  |   |                                                  |   |  |                                                                                                                                                                                                                                                                            |   |                                                 |   |  |   |  |   |                                                 |   |  |                                                                                                                                                                                                                                                                                                  |   |                                                           |   |  |   |  |   |                                                             |   |  |                                                                                                                                                                                                                                                                       |   |                                             |   |  |   |  |   |                                                |   |  |
| 1                                                                                                                                        |                                                                                                                                                                                                                                                                              |   |                                               |   |  |   |  |   |                                                     |   |  |                                                                                                                                                                                                                                                                              |   |                                                  |   |  |   |  |   |                                                  |   |  |                                                                                                                                                                                                                                                                            |   |                                                 |   |  |   |  |   |                                                 |   |  |                                                                                                                                                                                                                                                                                                  |   |                                                           |   |  |   |  |   |                                                             |   |  |                                                                                                                                                                                                                                                                       |   |                                             |   |  |   |  |   |                                                |   |  |
| 5                                                                                                                                        | I strongly agree with this ethical standard                                                                                                                                                                                                                                  |   |                                               |   |  |   |  |   |                                                     |   |  |                                                                                                                                                                                                                                                                              |   |                                                  |   |  |   |  |   |                                                  |   |  |                                                                                                                                                                                                                                                                            |   |                                                 |   |  |   |  |   |                                                 |   |  |                                                                                                                                                                                                                                                                                                  |   |                                                           |   |  |   |  |   |                                                             |   |  |                                                                                                                                                                                                                                                                       |   |                                             |   |  |   |  |   |                                                |   |  |
| 4                                                                                                                                        |                                                                                                                                                                                                                                                                              |   |                                               |   |  |   |  |   |                                                     |   |  |                                                                                                                                                                                                                                                                              |   |                                                  |   |  |   |  |   |                                                  |   |  |                                                                                                                                                                                                                                                                            |   |                                                 |   |  |   |  |   |                                                 |   |  |                                                                                                                                                                                                                                                                                                  |   |                                                           |   |  |   |  |   |                                                             |   |  |                                                                                                                                                                                                                                                                       |   |                                             |   |  |   |  |   |                                                |   |  |
| 3                                                                                                                                        |                                                                                                                                                                                                                                                                              |   |                                               |   |  |   |  |   |                                                     |   |  |                                                                                                                                                                                                                                                                              |   |                                                  |   |  |   |  |   |                                                  |   |  |                                                                                                                                                                                                                                                                            |   |                                                 |   |  |   |  |   |                                                 |   |  |                                                                                                                                                                                                                                                                                                  |   |                                                           |   |  |   |  |   |                                                             |   |  |                                                                                                                                                                                                                                                                       |   |                                             |   |  |   |  |   |                                                |   |  |
| 2                                                                                                                                        | I strongly disagree with this ethical standard                                                                                                                                                                                                                               |   |                                               |   |  |   |  |   |                                                     |   |  |                                                                                                                                                                                                                                                                              |   |                                                  |   |  |   |  |   |                                                  |   |  |                                                                                                                                                                                                                                                                            |   |                                                 |   |  |   |  |   |                                                 |   |  |                                                                                                                                                                                                                                                                                                  |   |                                                           |   |  |   |  |   |                                                             |   |  |                                                                                                                                                                                                                                                                       |   |                                             |   |  |   |  |   |                                                |   |  |
| 1                                                                                                                                        |                                                                                                                                                                                                                                                                              |   |                                               |   |  |   |  |   |                                                     |   |  |                                                                                                                                                                                                                                                                              |   |                                                  |   |  |   |  |   |                                                  |   |  |                                                                                                                                                                                                                                                                            |   |                                                 |   |  |   |  |   |                                                 |   |  |                                                                                                                                                                                                                                                                                                  |   |                                                           |   |  |   |  |   |                                                             |   |  |                                                                                                                                                                                                                                                                       |   |                                             |   |  |   |  |   |                                                |   |  |
| 19. Trials should help to develop HIV care services within the host country.                                                             | <table border="1"> <tr><td>5</td><td>I am very familiar with this ethical standard</td></tr> <tr><td>4</td><td></td></tr> <tr><td>3</td><td></td></tr> <tr><td>2</td><td>I am not at all familiar with this ethical standard</td></tr> <tr><td>1</td><td></td></tr> </table> | 5 | I am very familiar with this ethical standard | 4 |  | 3 |  | 2 | I am not at all familiar with this ethical standard | 1 |  | <table border="1"> <tr><td>5</td><td>This ethical standard is very easy to understand</td></tr> <tr><td>4</td><td></td></tr> <tr><td>3</td><td></td></tr> <tr><td>2</td><td>This ethical standard is very hard to understand</td></tr> <tr><td>1</td><td></td></tr> </table> | 5 | This ethical standard is very easy to understand | 4 |  | 3 |  | 2 | This ethical standard is very hard to understand | 1 |  | <table border="1"> <tr><td>5</td><td>This ethical standard is very easy to implement</td></tr> <tr><td>4</td><td></td></tr> <tr><td>3</td><td></td></tr> <tr><td>2</td><td>This ethical standard is very hard to implement</td></tr> <tr><td>1</td><td></td></tr> </table> | 5 | This ethical standard is very easy to implement | 4 |  | 3 |  | 2 | This ethical standard is very hard to implement | 1 |  | <table border="1"> <tr><td>5</td><td>This ethical standard greatly protects trial participants</td></tr> <tr><td>4</td><td></td></tr> <tr><td>3</td><td></td></tr> <tr><td>2</td><td>This ethical standard minimally protects trial participants</td></tr> <tr><td>1</td><td></td></tr> </table> | 5 | This ethical standard greatly protects trial participants | 4 |  | 3 |  | 2 | This ethical standard minimally protects trial participants | 1 |  | <table border="1"> <tr><td>5</td><td>I strongly agree with this ethical standard</td></tr> <tr><td>4</td><td></td></tr> <tr><td>3</td><td></td></tr> <tr><td>2</td><td>I strongly disagree with this ethical standard</td></tr> <tr><td>1</td><td></td></tr> </table> | 5 | I strongly agree with this ethical standard | 4 |  | 3 |  | 2 | I strongly disagree with this ethical standard | 1 |  |
| 5                                                                                                                                        | I am very familiar with this ethical standard                                                                                                                                                                                                                                |   |                                               |   |  |   |  |   |                                                     |   |  |                                                                                                                                                                                                                                                                              |   |                                                  |   |  |   |  |   |                                                  |   |  |                                                                                                                                                                                                                                                                            |   |                                                 |   |  |   |  |   |                                                 |   |  |                                                                                                                                                                                                                                                                                                  |   |                                                           |   |  |   |  |   |                                                             |   |  |                                                                                                                                                                                                                                                                       |   |                                             |   |  |   |  |   |                                                |   |  |
| 4                                                                                                                                        |                                                                                                                                                                                                                                                                              |   |                                               |   |  |   |  |   |                                                     |   |  |                                                                                                                                                                                                                                                                              |   |                                                  |   |  |   |  |   |                                                  |   |  |                                                                                                                                                                                                                                                                            |   |                                                 |   |  |   |  |   |                                                 |   |  |                                                                                                                                                                                                                                                                                                  |   |                                                           |   |  |   |  |   |                                                             |   |  |                                                                                                                                                                                                                                                                       |   |                                             |   |  |   |  |   |                                                |   |  |
| 3                                                                                                                                        |                                                                                                                                                                                                                                                                              |   |                                               |   |  |   |  |   |                                                     |   |  |                                                                                                                                                                                                                                                                              |   |                                                  |   |  |   |  |   |                                                  |   |  |                                                                                                                                                                                                                                                                            |   |                                                 |   |  |   |  |   |                                                 |   |  |                                                                                                                                                                                                                                                                                                  |   |                                                           |   |  |   |  |   |                                                             |   |  |                                                                                                                                                                                                                                                                       |   |                                             |   |  |   |  |   |                                                |   |  |
| 2                                                                                                                                        | I am not at all familiar with this ethical standard                                                                                                                                                                                                                          |   |                                               |   |  |   |  |   |                                                     |   |  |                                                                                                                                                                                                                                                                              |   |                                                  |   |  |   |  |   |                                                  |   |  |                                                                                                                                                                                                                                                                            |   |                                                 |   |  |   |  |   |                                                 |   |  |                                                                                                                                                                                                                                                                                                  |   |                                                           |   |  |   |  |   |                                                             |   |  |                                                                                                                                                                                                                                                                       |   |                                             |   |  |   |  |   |                                                |   |  |
| 1                                                                                                                                        |                                                                                                                                                                                                                                                                              |   |                                               |   |  |   |  |   |                                                     |   |  |                                                                                                                                                                                                                                                                              |   |                                                  |   |  |   |  |   |                                                  |   |  |                                                                                                                                                                                                                                                                            |   |                                                 |   |  |   |  |   |                                                 |   |  |                                                                                                                                                                                                                                                                                                  |   |                                                           |   |  |   |  |   |                                                             |   |  |                                                                                                                                                                                                                                                                       |   |                                             |   |  |   |  |   |                                                |   |  |
| 5                                                                                                                                        | This ethical standard is very easy to understand                                                                                                                                                                                                                             |   |                                               |   |  |   |  |   |                                                     |   |  |                                                                                                                                                                                                                                                                              |   |                                                  |   |  |   |  |   |                                                  |   |  |                                                                                                                                                                                                                                                                            |   |                                                 |   |  |   |  |   |                                                 |   |  |                                                                                                                                                                                                                                                                                                  |   |                                                           |   |  |   |  |   |                                                             |   |  |                                                                                                                                                                                                                                                                       |   |                                             |   |  |   |  |   |                                                |   |  |
| 4                                                                                                                                        |                                                                                                                                                                                                                                                                              |   |                                               |   |  |   |  |   |                                                     |   |  |                                                                                                                                                                                                                                                                              |   |                                                  |   |  |   |  |   |                                                  |   |  |                                                                                                                                                                                                                                                                            |   |                                                 |   |  |   |  |   |                                                 |   |  |                                                                                                                                                                                                                                                                                                  |   |                                                           |   |  |   |  |   |                                                             |   |  |                                                                                                                                                                                                                                                                       |   |                                             |   |  |   |  |   |                                                |   |  |
| 3                                                                                                                                        |                                                                                                                                                                                                                                                                              |   |                                               |   |  |   |  |   |                                                     |   |  |                                                                                                                                                                                                                                                                              |   |                                                  |   |  |   |  |   |                                                  |   |  |                                                                                                                                                                                                                                                                            |   |                                                 |   |  |   |  |   |                                                 |   |  |                                                                                                                                                                                                                                                                                                  |   |                                                           |   |  |   |  |   |                                                             |   |  |                                                                                                                                                                                                                                                                       |   |                                             |   |  |   |  |   |                                                |   |  |
| 2                                                                                                                                        | This ethical standard is very hard to understand                                                                                                                                                                                                                             |   |                                               |   |  |   |  |   |                                                     |   |  |                                                                                                                                                                                                                                                                              |   |                                                  |   |  |   |  |   |                                                  |   |  |                                                                                                                                                                                                                                                                            |   |                                                 |   |  |   |  |   |                                                 |   |  |                                                                                                                                                                                                                                                                                                  |   |                                                           |   |  |   |  |   |                                                             |   |  |                                                                                                                                                                                                                                                                       |   |                                             |   |  |   |  |   |                                                |   |  |
| 1                                                                                                                                        |                                                                                                                                                                                                                                                                              |   |                                               |   |  |   |  |   |                                                     |   |  |                                                                                                                                                                                                                                                                              |   |                                                  |   |  |   |  |   |                                                  |   |  |                                                                                                                                                                                                                                                                            |   |                                                 |   |  |   |  |   |                                                 |   |  |                                                                                                                                                                                                                                                                                                  |   |                                                           |   |  |   |  |   |                                                             |   |  |                                                                                                                                                                                                                                                                       |   |                                             |   |  |   |  |   |                                                |   |  |
| 5                                                                                                                                        | This ethical standard is very easy to implement                                                                                                                                                                                                                              |   |                                               |   |  |   |  |   |                                                     |   |  |                                                                                                                                                                                                                                                                              |   |                                                  |   |  |   |  |   |                                                  |   |  |                                                                                                                                                                                                                                                                            |   |                                                 |   |  |   |  |   |                                                 |   |  |                                                                                                                                                                                                                                                                                                  |   |                                                           |   |  |   |  |   |                                                             |   |  |                                                                                                                                                                                                                                                                       |   |                                             |   |  |   |  |   |                                                |   |  |
| 4                                                                                                                                        |                                                                                                                                                                                                                                                                              |   |                                               |   |  |   |  |   |                                                     |   |  |                                                                                                                                                                                                                                                                              |   |                                                  |   |  |   |  |   |                                                  |   |  |                                                                                                                                                                                                                                                                            |   |                                                 |   |  |   |  |   |                                                 |   |  |                                                                                                                                                                                                                                                                                                  |   |                                                           |   |  |   |  |   |                                                             |   |  |                                                                                                                                                                                                                                                                       |   |                                             |   |  |   |  |   |                                                |   |  |
| 3                                                                                                                                        |                                                                                                                                                                                                                                                                              |   |                                               |   |  |   |  |   |                                                     |   |  |                                                                                                                                                                                                                                                                              |   |                                                  |   |  |   |  |   |                                                  |   |  |                                                                                                                                                                                                                                                                            |   |                                                 |   |  |   |  |   |                                                 |   |  |                                                                                                                                                                                                                                                                                                  |   |                                                           |   |  |   |  |   |                                                             |   |  |                                                                                                                                                                                                                                                                       |   |                                             |   |  |   |  |   |                                                |   |  |
| 2                                                                                                                                        | This ethical standard is very hard to implement                                                                                                                                                                                                                              |   |                                               |   |  |   |  |   |                                                     |   |  |                                                                                                                                                                                                                                                                              |   |                                                  |   |  |   |  |   |                                                  |   |  |                                                                                                                                                                                                                                                                            |   |                                                 |   |  |   |  |   |                                                 |   |  |                                                                                                                                                                                                                                                                                                  |   |                                                           |   |  |   |  |   |                                                             |   |  |                                                                                                                                                                                                                                                                       |   |                                             |   |  |   |  |   |                                                |   |  |
| 1                                                                                                                                        |                                                                                                                                                                                                                                                                              |   |                                               |   |  |   |  |   |                                                     |   |  |                                                                                                                                                                                                                                                                              |   |                                                  |   |  |   |  |   |                                                  |   |  |                                                                                                                                                                                                                                                                            |   |                                                 |   |  |   |  |   |                                                 |   |  |                                                                                                                                                                                                                                                                                                  |   |                                                           |   |  |   |  |   |                                                             |   |  |                                                                                                                                                                                                                                                                       |   |                                             |   |  |   |  |   |                                                |   |  |
| 5                                                                                                                                        | This ethical standard greatly protects trial participants                                                                                                                                                                                                                    |   |                                               |   |  |   |  |   |                                                     |   |  |                                                                                                                                                                                                                                                                              |   |                                                  |   |  |   |  |   |                                                  |   |  |                                                                                                                                                                                                                                                                            |   |                                                 |   |  |   |  |   |                                                 |   |  |                                                                                                                                                                                                                                                                                                  |   |                                                           |   |  |   |  |   |                                                             |   |  |                                                                                                                                                                                                                                                                       |   |                                             |   |  |   |  |   |                                                |   |  |
| 4                                                                                                                                        |                                                                                                                                                                                                                                                                              |   |                                               |   |  |   |  |   |                                                     |   |  |                                                                                                                                                                                                                                                                              |   |                                                  |   |  |   |  |   |                                                  |   |  |                                                                                                                                                                                                                                                                            |   |                                                 |   |  |   |  |   |                                                 |   |  |                                                                                                                                                                                                                                                                                                  |   |                                                           |   |  |   |  |   |                                                             |   |  |                                                                                                                                                                                                                                                                       |   |                                             |   |  |   |  |   |                                                |   |  |
| 3                                                                                                                                        |                                                                                                                                                                                                                                                                              |   |                                               |   |  |   |  |   |                                                     |   |  |                                                                                                                                                                                                                                                                              |   |                                                  |   |  |   |  |   |                                                  |   |  |                                                                                                                                                                                                                                                                            |   |                                                 |   |  |   |  |   |                                                 |   |  |                                                                                                                                                                                                                                                                                                  |   |                                                           |   |  |   |  |   |                                                             |   |  |                                                                                                                                                                                                                                                                       |   |                                             |   |  |   |  |   |                                                |   |  |
| 2                                                                                                                                        | This ethical standard minimally protects trial participants                                                                                                                                                                                                                  |   |                                               |   |  |   |  |   |                                                     |   |  |                                                                                                                                                                                                                                                                              |   |                                                  |   |  |   |  |   |                                                  |   |  |                                                                                                                                                                                                                                                                            |   |                                                 |   |  |   |  |   |                                                 |   |  |                                                                                                                                                                                                                                                                                                  |   |                                                           |   |  |   |  |   |                                                             |   |  |                                                                                                                                                                                                                                                                       |   |                                             |   |  |   |  |   |                                                |   |  |
| 1                                                                                                                                        |                                                                                                                                                                                                                                                                              |   |                                               |   |  |   |  |   |                                                     |   |  |                                                                                                                                                                                                                                                                              |   |                                                  |   |  |   |  |   |                                                  |   |  |                                                                                                                                                                                                                                                                            |   |                                                 |   |  |   |  |   |                                                 |   |  |                                                                                                                                                                                                                                                                                                  |   |                                                           |   |  |   |  |   |                                                             |   |  |                                                                                                                                                                                                                                                                       |   |                                             |   |  |   |  |   |                                                |   |  |
| 5                                                                                                                                        | I strongly agree with this ethical standard                                                                                                                                                                                                                                  |   |                                               |   |  |   |  |   |                                                     |   |  |                                                                                                                                                                                                                                                                              |   |                                                  |   |  |   |  |   |                                                  |   |  |                                                                                                                                                                                                                                                                            |   |                                                 |   |  |   |  |   |                                                 |   |  |                                                                                                                                                                                                                                                                                                  |   |                                                           |   |  |   |  |   |                                                             |   |  |                                                                                                                                                                                                                                                                       |   |                                             |   |  |   |  |   |                                                |   |  |
| 4                                                                                                                                        |                                                                                                                                                                                                                                                                              |   |                                               |   |  |   |  |   |                                                     |   |  |                                                                                                                                                                                                                                                                              |   |                                                  |   |  |   |  |   |                                                  |   |  |                                                                                                                                                                                                                                                                            |   |                                                 |   |  |   |  |   |                                                 |   |  |                                                                                                                                                                                                                                                                                                  |   |                                                           |   |  |   |  |   |                                                             |   |  |                                                                                                                                                                                                                                                                       |   |                                             |   |  |   |  |   |                                                |   |  |
| 3                                                                                                                                        |                                                                                                                                                                                                                                                                              |   |                                               |   |  |   |  |   |                                                     |   |  |                                                                                                                                                                                                                                                                              |   |                                                  |   |  |   |  |   |                                                  |   |  |                                                                                                                                                                                                                                                                            |   |                                                 |   |  |   |  |   |                                                 |   |  |                                                                                                                                                                                                                                                                                                  |   |                                                           |   |  |   |  |   |                                                             |   |  |                                                                                                                                                                                                                                                                       |   |                                             |   |  |   |  |   |                                                |   |  |
| 2                                                                                                                                        | I strongly disagree with this ethical standard                                                                                                                                                                                                                               |   |                                               |   |  |   |  |   |                                                     |   |  |                                                                                                                                                                                                                                                                              |   |                                                  |   |  |   |  |   |                                                  |   |  |                                                                                                                                                                                                                                                                            |   |                                                 |   |  |   |  |   |                                                 |   |  |                                                                                                                                                                                                                                                                                                  |   |                                                           |   |  |   |  |   |                                                             |   |  |                                                                                                                                                                                                                                                                       |   |                                             |   |  |   |  |   |                                                |   |  |
| 1                                                                                                                                        |                                                                                                                                                                                                                                                                              |   |                                               |   |  |   |  |   |                                                     |   |  |                                                                                                                                                                                                                                                                              |   |                                                  |   |  |   |  |   |                                                  |   |  |                                                                                                                                                                                                                                                                            |   |                                                 |   |  |   |  |   |                                                 |   |  |                                                                                                                                                                                                                                                                                                  |   |                                                           |   |  |   |  |   |                                                             |   |  |                                                                                                                                                                                                                                                                       |   |                                             |   |  |   |  |   |                                                |   |  |
| 20. Care approaches, and their successes and failures, should be carefully documented.                                                   | <table border="1"> <tr><td>5</td><td>I am very familiar with this ethical standard</td></tr> <tr><td>4</td><td></td></tr> <tr><td>3</td><td></td></tr> <tr><td>2</td><td>I am not at all familiar with this ethical standard</td></tr> <tr><td>1</td><td></td></tr> </table> | 5 | I am very familiar with this ethical standard | 4 |  | 3 |  | 2 | I am not at all familiar with this ethical standard | 1 |  | <table border="1"> <tr><td>5</td><td>This ethical standard is very easy to understand</td></tr> <tr><td>4</td><td></td></tr> <tr><td>3</td><td></td></tr> <tr><td>2</td><td>This ethical standard is very hard to understand</td></tr> <tr><td>1</td><td></td></tr> </table> | 5 | This ethical standard is very easy to understand | 4 |  | 3 |  | 2 | This ethical standard is very hard to understand | 1 |  | <table border="1"> <tr><td>5</td><td>This ethical standard is very easy to implement</td></tr> <tr><td>4</td><td></td></tr> <tr><td>3</td><td></td></tr> <tr><td>2</td><td>This ethical standard is very hard to implement</td></tr> <tr><td>1</td><td></td></tr> </table> | 5 | This ethical standard is very easy to implement | 4 |  | 3 |  | 2 | This ethical standard is very hard to implement | 1 |  | <table border="1"> <tr><td>5</td><td>This ethical standard greatly protects trial participants</td></tr> <tr><td>4</td><td></td></tr> <tr><td>3</td><td></td></tr> <tr><td>2</td><td>This ethical standard minimally protects trial participants</td></tr> <tr><td>1</td><td></td></tr> </table> | 5 | This ethical standard greatly protects trial participants | 4 |  | 3 |  | 2 | This ethical standard minimally protects trial participants | 1 |  | <table border="1"> <tr><td>5</td><td>I strongly agree with this ethical standard</td></tr> <tr><td>4</td><td></td></tr> <tr><td>3</td><td></td></tr> <tr><td>2</td><td>I strongly disagree with this ethical standard</td></tr> <tr><td>1</td><td></td></tr> </table> | 5 | I strongly agree with this ethical standard | 4 |  | 3 |  | 2 | I strongly disagree with this ethical standard | 1 |  |
| 5                                                                                                                                        | I am very familiar with this ethical standard                                                                                                                                                                                                                                |   |                                               |   |  |   |  |   |                                                     |   |  |                                                                                                                                                                                                                                                                              |   |                                                  |   |  |   |  |   |                                                  |   |  |                                                                                                                                                                                                                                                                            |   |                                                 |   |  |   |  |   |                                                 |   |  |                                                                                                                                                                                                                                                                                                  |   |                                                           |   |  |   |  |   |                                                             |   |  |                                                                                                                                                                                                                                                                       |   |                                             |   |  |   |  |   |                                                |   |  |
| 4                                                                                                                                        |                                                                                                                                                                                                                                                                              |   |                                               |   |  |   |  |   |                                                     |   |  |                                                                                                                                                                                                                                                                              |   |                                                  |   |  |   |  |   |                                                  |   |  |                                                                                                                                                                                                                                                                            |   |                                                 |   |  |   |  |   |                                                 |   |  |                                                                                                                                                                                                                                                                                                  |   |                                                           |   |  |   |  |   |                                                             |   |  |                                                                                                                                                                                                                                                                       |   |                                             |   |  |   |  |   |                                                |   |  |
| 3                                                                                                                                        |                                                                                                                                                                                                                                                                              |   |                                               |   |  |   |  |   |                                                     |   |  |                                                                                                                                                                                                                                                                              |   |                                                  |   |  |   |  |   |                                                  |   |  |                                                                                                                                                                                                                                                                            |   |                                                 |   |  |   |  |   |                                                 |   |  |                                                                                                                                                                                                                                                                                                  |   |                                                           |   |  |   |  |   |                                                             |   |  |                                                                                                                                                                                                                                                                       |   |                                             |   |  |   |  |   |                                                |   |  |
| 2                                                                                                                                        | I am not at all familiar with this ethical standard                                                                                                                                                                                                                          |   |                                               |   |  |   |  |   |                                                     |   |  |                                                                                                                                                                                                                                                                              |   |                                                  |   |  |   |  |   |                                                  |   |  |                                                                                                                                                                                                                                                                            |   |                                                 |   |  |   |  |   |                                                 |   |  |                                                                                                                                                                                                                                                                                                  |   |                                                           |   |  |   |  |   |                                                             |   |  |                                                                                                                                                                                                                                                                       |   |                                             |   |  |   |  |   |                                                |   |  |
| 1                                                                                                                                        |                                                                                                                                                                                                                                                                              |   |                                               |   |  |   |  |   |                                                     |   |  |                                                                                                                                                                                                                                                                              |   |                                                  |   |  |   |  |   |                                                  |   |  |                                                                                                                                                                                                                                                                            |   |                                                 |   |  |   |  |   |                                                 |   |  |                                                                                                                                                                                                                                                                                                  |   |                                                           |   |  |   |  |   |                                                             |   |  |                                                                                                                                                                                                                                                                       |   |                                             |   |  |   |  |   |                                                |   |  |
| 5                                                                                                                                        | This ethical standard is very easy to understand                                                                                                                                                                                                                             |   |                                               |   |  |   |  |   |                                                     |   |  |                                                                                                                                                                                                                                                                              |   |                                                  |   |  |   |  |   |                                                  |   |  |                                                                                                                                                                                                                                                                            |   |                                                 |   |  |   |  |   |                                                 |   |  |                                                                                                                                                                                                                                                                                                  |   |                                                           |   |  |   |  |   |                                                             |   |  |                                                                                                                                                                                                                                                                       |   |                                             |   |  |   |  |   |                                                |   |  |
| 4                                                                                                                                        |                                                                                                                                                                                                                                                                              |   |                                               |   |  |   |  |   |                                                     |   |  |                                                                                                                                                                                                                                                                              |   |                                                  |   |  |   |  |   |                                                  |   |  |                                                                                                                                                                                                                                                                            |   |                                                 |   |  |   |  |   |                                                 |   |  |                                                                                                                                                                                                                                                                                                  |   |                                                           |   |  |   |  |   |                                                             |   |  |                                                                                                                                                                                                                                                                       |   |                                             |   |  |   |  |   |                                                |   |  |
| 3                                                                                                                                        |                                                                                                                                                                                                                                                                              |   |                                               |   |  |   |  |   |                                                     |   |  |                                                                                                                                                                                                                                                                              |   |                                                  |   |  |   |  |   |                                                  |   |  |                                                                                                                                                                                                                                                                            |   |                                                 |   |  |   |  |   |                                                 |   |  |                                                                                                                                                                                                                                                                                                  |   |                                                           |   |  |   |  |   |                                                             |   |  |                                                                                                                                                                                                                                                                       |   |                                             |   |  |   |  |   |                                                |   |  |
| 2                                                                                                                                        | This ethical standard is very hard to understand                                                                                                                                                                                                                             |   |                                               |   |  |   |  |   |                                                     |   |  |                                                                                                                                                                                                                                                                              |   |                                                  |   |  |   |  |   |                                                  |   |  |                                                                                                                                                                                                                                                                            |   |                                                 |   |  |   |  |   |                                                 |   |  |                                                                                                                                                                                                                                                                                                  |   |                                                           |   |  |   |  |   |                                                             |   |  |                                                                                                                                                                                                                                                                       |   |                                             |   |  |   |  |   |                                                |   |  |
| 1                                                                                                                                        |                                                                                                                                                                                                                                                                              |   |                                               |   |  |   |  |   |                                                     |   |  |                                                                                                                                                                                                                                                                              |   |                                                  |   |  |   |  |   |                                                  |   |  |                                                                                                                                                                                                                                                                            |   |                                                 |   |  |   |  |   |                                                 |   |  |                                                                                                                                                                                                                                                                                                  |   |                                                           |   |  |   |  |   |                                                             |   |  |                                                                                                                                                                                                                                                                       |   |                                             |   |  |   |  |   |                                                |   |  |
| 5                                                                                                                                        | This ethical standard is very easy to implement                                                                                                                                                                                                                              |   |                                               |   |  |   |  |   |                                                     |   |  |                                                                                                                                                                                                                                                                              |   |                                                  |   |  |   |  |   |                                                  |   |  |                                                                                                                                                                                                                                                                            |   |                                                 |   |  |   |  |   |                                                 |   |  |                                                                                                                                                                                                                                                                                                  |   |                                                           |   |  |   |  |   |                                                             |   |  |                                                                                                                                                                                                                                                                       |   |                                             |   |  |   |  |   |                                                |   |  |
| 4                                                                                                                                        |                                                                                                                                                                                                                                                                              |   |                                               |   |  |   |  |   |                                                     |   |  |                                                                                                                                                                                                                                                                              |   |                                                  |   |  |   |  |   |                                                  |   |  |                                                                                                                                                                                                                                                                            |   |                                                 |   |  |   |  |   |                                                 |   |  |                                                                                                                                                                                                                                                                                                  |   |                                                           |   |  |   |  |   |                                                             |   |  |                                                                                                                                                                                                                                                                       |   |                                             |   |  |   |  |   |                                                |   |  |
| 3                                                                                                                                        |                                                                                                                                                                                                                                                                              |   |                                               |   |  |   |  |   |                                                     |   |  |                                                                                                                                                                                                                                                                              |   |                                                  |   |  |   |  |   |                                                  |   |  |                                                                                                                                                                                                                                                                            |   |                                                 |   |  |   |  |   |                                                 |   |  |                                                                                                                                                                                                                                                                                                  |   |                                                           |   |  |   |  |   |                                                             |   |  |                                                                                                                                                                                                                                                                       |   |                                             |   |  |   |  |   |                                                |   |  |
| 2                                                                                                                                        | This ethical standard is very hard to implement                                                                                                                                                                                                                              |   |                                               |   |  |   |  |   |                                                     |   |  |                                                                                                                                                                                                                                                                              |   |                                                  |   |  |   |  |   |                                                  |   |  |                                                                                                                                                                                                                                                                            |   |                                                 |   |  |   |  |   |                                                 |   |  |                                                                                                                                                                                                                                                                                                  |   |                                                           |   |  |   |  |   |                                                             |   |  |                                                                                                                                                                                                                                                                       |   |                                             |   |  |   |  |   |                                                |   |  |
| 1                                                                                                                                        |                                                                                                                                                                                                                                                                              |   |                                               |   |  |   |  |   |                                                     |   |  |                                                                                                                                                                                                                                                                              |   |                                                  |   |  |   |  |   |                                                  |   |  |                                                                                                                                                                                                                                                                            |   |                                                 |   |  |   |  |   |                                                 |   |  |                                                                                                                                                                                                                                                                                                  |   |                                                           |   |  |   |  |   |                                                             |   |  |                                                                                                                                                                                                                                                                       |   |                                             |   |  |   |  |   |                                                |   |  |
| 5                                                                                                                                        | This ethical standard greatly protects trial participants                                                                                                                                                                                                                    |   |                                               |   |  |   |  |   |                                                     |   |  |                                                                                                                                                                                                                                                                              |   |                                                  |   |  |   |  |   |                                                  |   |  |                                                                                                                                                                                                                                                                            |   |                                                 |   |  |   |  |   |                                                 |   |  |                                                                                                                                                                                                                                                                                                  |   |                                                           |   |  |   |  |   |                                                             |   |  |                                                                                                                                                                                                                                                                       |   |                                             |   |  |   |  |   |                                                |   |  |
| 4                                                                                                                                        |                                                                                                                                                                                                                                                                              |   |                                               |   |  |   |  |   |                                                     |   |  |                                                                                                                                                                                                                                                                              |   |                                                  |   |  |   |  |   |                                                  |   |  |                                                                                                                                                                                                                                                                            |   |                                                 |   |  |   |  |   |                                                 |   |  |                                                                                                                                                                                                                                                                                                  |   |                                                           |   |  |   |  |   |                                                             |   |  |                                                                                                                                                                                                                                                                       |   |                                             |   |  |   |  |   |                                                |   |  |
| 3                                                                                                                                        |                                                                                                                                                                                                                                                                              |   |                                               |   |  |   |  |   |                                                     |   |  |                                                                                                                                                                                                                                                                              |   |                                                  |   |  |   |  |   |                                                  |   |  |                                                                                                                                                                                                                                                                            |   |                                                 |   |  |   |  |   |                                                 |   |  |                                                                                                                                                                                                                                                                                                  |   |                                                           |   |  |   |  |   |                                                             |   |  |                                                                                                                                                                                                                                                                       |   |                                             |   |  |   |  |   |                                                |   |  |
| 2                                                                                                                                        | This ethical standard minimally protects trial participants                                                                                                                                                                                                                  |   |                                               |   |  |   |  |   |                                                     |   |  |                                                                                                                                                                                                                                                                              |   |                                                  |   |  |   |  |   |                                                  |   |  |                                                                                                                                                                                                                                                                            |   |                                                 |   |  |   |  |   |                                                 |   |  |                                                                                                                                                                                                                                                                                                  |   |                                                           |   |  |   |  |   |                                                             |   |  |                                                                                                                                                                                                                                                                       |   |                                             |   |  |   |  |   |                                                |   |  |
| 1                                                                                                                                        |                                                                                                                                                                                                                                                                              |   |                                               |   |  |   |  |   |                                                     |   |  |                                                                                                                                                                                                                                                                              |   |                                                  |   |  |   |  |   |                                                  |   |  |                                                                                                                                                                                                                                                                            |   |                                                 |   |  |   |  |   |                                                 |   |  |                                                                                                                                                                                                                                                                                                  |   |                                                           |   |  |   |  |   |                                                             |   |  |                                                                                                                                                                                                                                                                       |   |                                             |   |  |   |  |   |                                                |   |  |
| 5                                                                                                                                        | I strongly agree with this ethical standard                                                                                                                                                                                                                                  |   |                                               |   |  |   |  |   |                                                     |   |  |                                                                                                                                                                                                                                                                              |   |                                                  |   |  |   |  |   |                                                  |   |  |                                                                                                                                                                                                                                                                            |   |                                                 |   |  |   |  |   |                                                 |   |  |                                                                                                                                                                                                                                                                                                  |   |                                                           |   |  |   |  |   |                                                             |   |  |                                                                                                                                                                                                                                                                       |   |                                             |   |  |   |  |   |                                                |   |  |
| 4                                                                                                                                        |                                                                                                                                                                                                                                                                              |   |                                               |   |  |   |  |   |                                                     |   |  |                                                                                                                                                                                                                                                                              |   |                                                  |   |  |   |  |   |                                                  |   |  |                                                                                                                                                                                                                                                                            |   |                                                 |   |  |   |  |   |                                                 |   |  |                                                                                                                                                                                                                                                                                                  |   |                                                           |   |  |   |  |   |                                                             |   |  |                                                                                                                                                                                                                                                                       |   |                                             |   |  |   |  |   |                                                |   |  |
| 3                                                                                                                                        |                                                                                                                                                                                                                                                                              |   |                                               |   |  |   |  |   |                                                     |   |  |                                                                                                                                                                                                                                                                              |   |                                                  |   |  |   |  |   |                                                  |   |  |                                                                                                                                                                                                                                                                            |   |                                                 |   |  |   |  |   |                                                 |   |  |                                                                                                                                                                                                                                                                                                  |   |                                                           |   |  |   |  |   |                                                             |   |  |                                                                                                                                                                                                                                                                       |   |                                             |   |  |   |  |   |                                                |   |  |
| 2                                                                                                                                        | I strongly disagree with this ethical standard                                                                                                                                                                                                                               |   |                                               |   |  |   |  |   |                                                     |   |  |                                                                                                                                                                                                                                                                              |   |                                                  |   |  |   |  |   |                                                  |   |  |                                                                                                                                                                                                                                                                            |   |                                                 |   |  |   |  |   |                                                 |   |  |                                                                                                                                                                                                                                                                                                  |   |                                                           |   |  |   |  |   |                                                             |   |  |                                                                                                                                                                                                                                                                       |   |                                             |   |  |   |  |   |                                                |   |  |
| 1                                                                                                                                        |                                                                                                                                                                                                                                                                              |   |                                               |   |  |   |  |   |                                                     |   |  |                                                                                                                                                                                                                                                                              |   |                                                  |   |  |   |  |   |                                                  |   |  |                                                                                                                                                                                                                                                                            |   |                                                 |   |  |   |  |   |                                                 |   |  |                                                                                                                                                                                                                                                                                                  |   |                                                           |   |  |   |  |   |                                                             |   |  |                                                                                                                                                                                                                                                                       |   |                                             |   |  |   |  |   |                                                |   |  |

21. Do you have any comments or thoughts about the ethical standards listed in this questionnaire?

"  
"  
"  
"  
"  
"  
"  
"

22. To what extent do you think that HIV vaccine trial sites in South Africa are able to meet these standards?

.  
.  
.

23. Please indicate whether you think it is essential or not that South African HIV vaccine trial participants get access to the following preventative measures:

|                                    |                                               |                                                         |
|------------------------------------|-----------------------------------------------|---------------------------------------------------------|
| A. Male condoms                    | <input checked="" type="checkbox"/> Essential | <input type="checkbox"/> Nice-to-have but not essential |
| B. Female condoms                  | <input checked="" type="checkbox"/> Essential | <input type="checkbox"/> Nice-to-have but not essential |
| C. Risk reduction counselling      | <input checked="" type="checkbox"/> Essential | <input type="checkbox"/> Nice-to-have but not essential |
| D. Sterile injecting equipment     | <input checked="" type="checkbox"/> Essential | <input type="checkbox"/> Nice-to-have but not essential |
| E. Treatment of STIs               | <input checked="" type="checkbox"/> Essential | <input type="checkbox"/> Nice-to-have but not essential |
| F. Post-exposure prophylaxis (PEP) | <input checked="" type="checkbox"/> Essential | <input type="checkbox"/> Nice-to-have but not essential |
| G. Male circumcision               | <input checked="" type="checkbox"/> Essential | <input type="checkbox"/> Nice-to-have but not essential |

If funds were limited, which THREE of the above prevention services would you prioritize (A, B, C, D, etc.)?

|  |  |  |
|--|--|--|
|  |  |  |
|--|--|--|

Other preventative measures that you consider ESSENTIAL to provide to participants

---

Other preventative measures that you consider NICE-TO-HAVE BUT NOT ESSENTIAL

---

Preventative measures (including those listed above) that you think should NOT be provided

---

24. Please indicate whether you think it is essential or not that South African HIV vaccine trial participants get access to the following care services:

|                                                          |                                    |                                                         |
|----------------------------------------------------------|------------------------------------|---------------------------------------------------------|
| A. Positive prevention counselling                       | <input type="checkbox"/> Essential | <input type="checkbox"/> Nice-to-have but not essential |
| B. Social support                                        | <input type="checkbox"/> Essential | <input type="checkbox"/> Nice-to-have but not essential |
| C. TB prevention and treatment                           | <input type="checkbox"/> Essential | <input type="checkbox"/> Nice-to-have but not essential |
| D. Opportunistic infection prevention and treatment      | <input type="checkbox"/> Essential | <input type="checkbox"/> Nice-to-have but not essential |
| E. STI treatment                                         | <input type="checkbox"/> Essential | <input type="checkbox"/> Nice-to-have but not essential |
| F. Nutrition                                             | <input type="checkbox"/> Essential | <input type="checkbox"/> Nice-to-have but not essential |
| G. Testing of CD4 counts/ viral loads                    | <input type="checkbox"/> Essential | <input type="checkbox"/> Nice-to-have but not essential |
| H. Antiretroviral therapy (ART)                          | <input type="checkbox"/> Essential | <input type="checkbox"/> Nice-to-have but not essential |
| I. Palliative care                                       | <input type="checkbox"/> Essential | <input type="checkbox"/> Nice-to-have but not essential |
| J. Home-based care                                       | <input type="checkbox"/> Essential | <input type="checkbox"/> Nice-to-have but not essential |
| K. Reproductive health care for pregnancy and childbirth | <input type="checkbox"/> Essential | <input type="checkbox"/> Nice-to-have but not essential |
| L. Prevention of mother to child transmission (pMTCT)    | <input type="checkbox"/> Essential | <input type="checkbox"/> Nice-to-have but not essential |

If funds were limited, which FIVE of the above care services would you prioritize (A, B, C, D, etc.)?

|                          |                          |                          |                          |                          |
|--------------------------|--------------------------|--------------------------|--------------------------|--------------------------|
| <input type="checkbox"/> | <input type="checkbox"/> | <input type="checkbox"/> | <input type="checkbox"/> | <input type="checkbox"/> |
|--------------------------|--------------------------|--------------------------|--------------------------|--------------------------|

Other care measures that you consider  
ESSENTIAL to provide to participants \_\_\_\_\_

Other care measures that you consider  
NICE-TO-HAVE BUT NOT ESSENTIAL \_\_\_\_\_

Care measures (including those listed  
above) that you think  
should NOT be provided \_\_\_\_\_

Thank you for your participation!
